# Supplementary material for: Illustrating papyrus in Ancient Egypt
Source: Springer Nature journal article supplement (doi:10.1038/s41598-023-27761-7), 2023-01-10

## **Supplementary information**

### **Illustrating papyrus in Ancient Egypt**

Pierre-Olivier Autran<sup>1,2</sup>, Catherine Dejoie<sup>1,\*</sup>, Caroline Dugand<sup>3</sup>, Maeva Gervason<sup>3</sup>, Pierre Bordet<sup>2</sup>, Jean-Louis Hodeau<sup>2</sup>, Michel Anne<sup>2</sup>, Pauline Martinetto<sup>2,\*</sup>

<sup>1</sup>European Synchrotron Radiation Facility, 71 avenue des Martyrs, 38000 Grenoble, France

<sup>2</sup>Univ. Grenoble Alpes, CNRS, Institut Néel, 38000 Grenoble, France

<sup>3</sup>Musée Champollion, 45 rue Champollion, 38450 Vif, France

\*Corresponding authors: [catherine.dejoie@esrf.fr](mailto:catherine.dejoie@esrf.fr); [pauline.martinetto@neel.cnrs.fr](mailto:pauline.martinetto@neel.cnrs.fr)

**Table S1.** Quantitative analysis obtained after refinement against the diffraction data collected in the red solar disk region of PAP-6 (see Fig. S7). The total weight percent in cellulose (Sum Cellu.) and in calcium oxalate (Sum WW) were obtained after summing the contributions of the two cellulose phases (P1 and P2) and of weddellite (Wedd) and whewellite (Whe), respectively. The value obtained for gypsum, if present, was added to the syngenite (Syn) one. Cin: cinnabar; Ratio W/W: ratio weddellite/whewellite; Ratio H/S: ratio hematite/syngenite; St. dev.: standard deviation.

| Pattern no. | P1      | P2      | Wedd    | Whe     | Hem     | Syn     | Cin      | Sum Cellu. | Sum WW | Ratio W/W | Ratio H/S |
|-------------|---------|---------|---------|---------|---------|---------|----------|------------|--------|-----------|-----------|
| G-6785      | 87.9(1) | 3.42(6) | 4.06(5) | 2.01(4) | 0.63(1) | 1.93(6) | 0.068(4) | 91.3       | 6.08   | 2.02      | 0.33      |
| G-7285      | 89.9(2) | 3.50(9) | 3.24(7) | 1.70(5) | 0.37(1) | 1.20(8) | 0.059(5) | 93.4       | 4.94   | 1.90      | 0.31      |
| G-7535      | 90.8(1) | 2.40(5) | 2.91(4) | 1.55(5) | 0.44(1) | 1.79(4) | 0.070(2) | 93.2       | 4.46   | 1.88      | 0.25      |
| G-7785      | 88.8(2) | 3.63(9) | 3.63(6) | 1.53(5) | 0.47(1) | 1.76(7) | 0.142(5) | 92.5       | 5.16   | 2.37      | 0.27      |
| G-8035      | 87.4(2) | 4.9(1)  | 2.87(7) | 1.65(5) | 0.24(1) | 2.96(8) | 0.012(5) | 92.3       | 4.53   | 1.74      | 0.08      |
| G-8285      | 90.3(1) | 4.39(9) | 3.00(5) | 1.20(4) | 0.21(1) | 0.91(6) | 0.024(3) | 94.7       | 4.20   | 2.49      | 0.23      |
| G-8535      | 85.7(2) | 4.82(9) | 3.47(6) | 2.59(5) | 0.92(2) | 2.43(5) | 0.069(5) | 90.5       | 6.07   | 1.34      | 0.38      |
| G-8785      | 86.5(1) | 4.17(9) | 2.65(5) | 2.33(5) | 1.44(2) | 2.83(6) | 0.058(4) | 90.7       | 4.98   | 1.14      | 0.51      |
| Average     | 88.4    | 3.90    | 3.23    | 1.82    | 0.59    | 1.98    | 0.06     | 92.3       | 5.05   | 1.86      | 0.29      |
| St. dev.    | 1.9     | 0.83    | 0.47    | 0.46    | 0.41    | 0.73    | 0.04     | 1.4        | 0.70   | 0.46      | 0.12      |

**Table S2.** Quantitative analysis obtained after refinement against the diffraction data collected in the red region of the column decoration of PAP-12 (see Fig. S7). The total weight percent in cellulose (Sum Cellu.) and in calcium oxalate (Sum WW) were obtained after summing the contributions of the two cellulose phases (P1 and P2) and of weddellite (Wedd) and whewellite (Whe), respectively. The value obtained for gypsum, if present, was added to the syngenite (Syn) one. Cin: cinnabar; Ratio W/W: ratio weddellite/whewellite; Ratio H/S: ratio hematite/syngenite; St. dev.: standard deviation.

| Pattern no. | P1      | P2      | Wedd    | Whe     | Hem     | Syn     | Cin      | Sum Cellu. | Sum WW | Ratio W/W | Ratio H/S |
|-------------|---------|---------|---------|---------|---------|---------|----------|------------|--------|-----------|-----------|
| C-22750     | 90.8(1) | 6.63(8) | 0.87(2) | 0.72(4) | 0.67(1) | 0.30(2) | 0.052(4) | 97.4       | 1.59   | 1.22      | 2.22      |
| C-20250     | 84.6(3) | 7.1(2)  | 1.58(6) | 2.75(8) | 2.66(5) | 1.06(3) | 0.238(9) | 91.7       | 4.33   | 0.57      | 2.52      |
| C-20000     | 83.2(3) | 7.1(1)  | 2.26(6) | 2.50(7) | 2.39(4) | 2.39(8) | 0.174(7) | 90.3       | 4.76   | 0.90      | 1.00      |
| C-19750     | 83.9(4) | 6.7(2)  | 2.3(1)  | 2.1(1)  | 2.42(5) | 2.42(8) | 0.092(8) | 90.6       | 4.46   | 1.08      | 1.00      |
| C-19500     | 85.2(2) | 6.9(1)  | 2.30(8) | 1.67(7) | 2.06(3) | 1.72(6) | 0.095(5) | 92.1       | 3.98   | 1.38      | 1.20      |
| C-19250     | 83.8(3) | 8.2(2)  | 2.19(6) | 1.91(7) | 1.91(4) | 1.90(6) | 0.105(5) | 92.0       | 4.10   | 1.15      | 1.01      |
| C-19000     | 82.4(3) | 8.8(2)  | 2.53(6) | 2.20(7) | 1.90(3) | 2.11(5) | 0.047(4) | 91.2       | 4.72   | 1.15      | 0.90      |
| C-18750     | 87.4(2) | 7.3(1)  | 1.47(7) | 1.57(8) | 0.95(2) | 1.23(5) | 0.037(3) | 94.7       | 3.04   | 0.94      | 0.77      |
| Average     | 85.2    | 7.4     | 1.94    | 1.93    | 1.87    | 1.64    | 0.11     | 92.5       | 3.87   | 1.05      | 1.33      |
| St. dev.    | 2.7     | 0.8     | 0.57    | 0.63    | 0.71    | 0.73    | 0.07     | 2.4        | 1.07   | 0.24      | 0.66      |

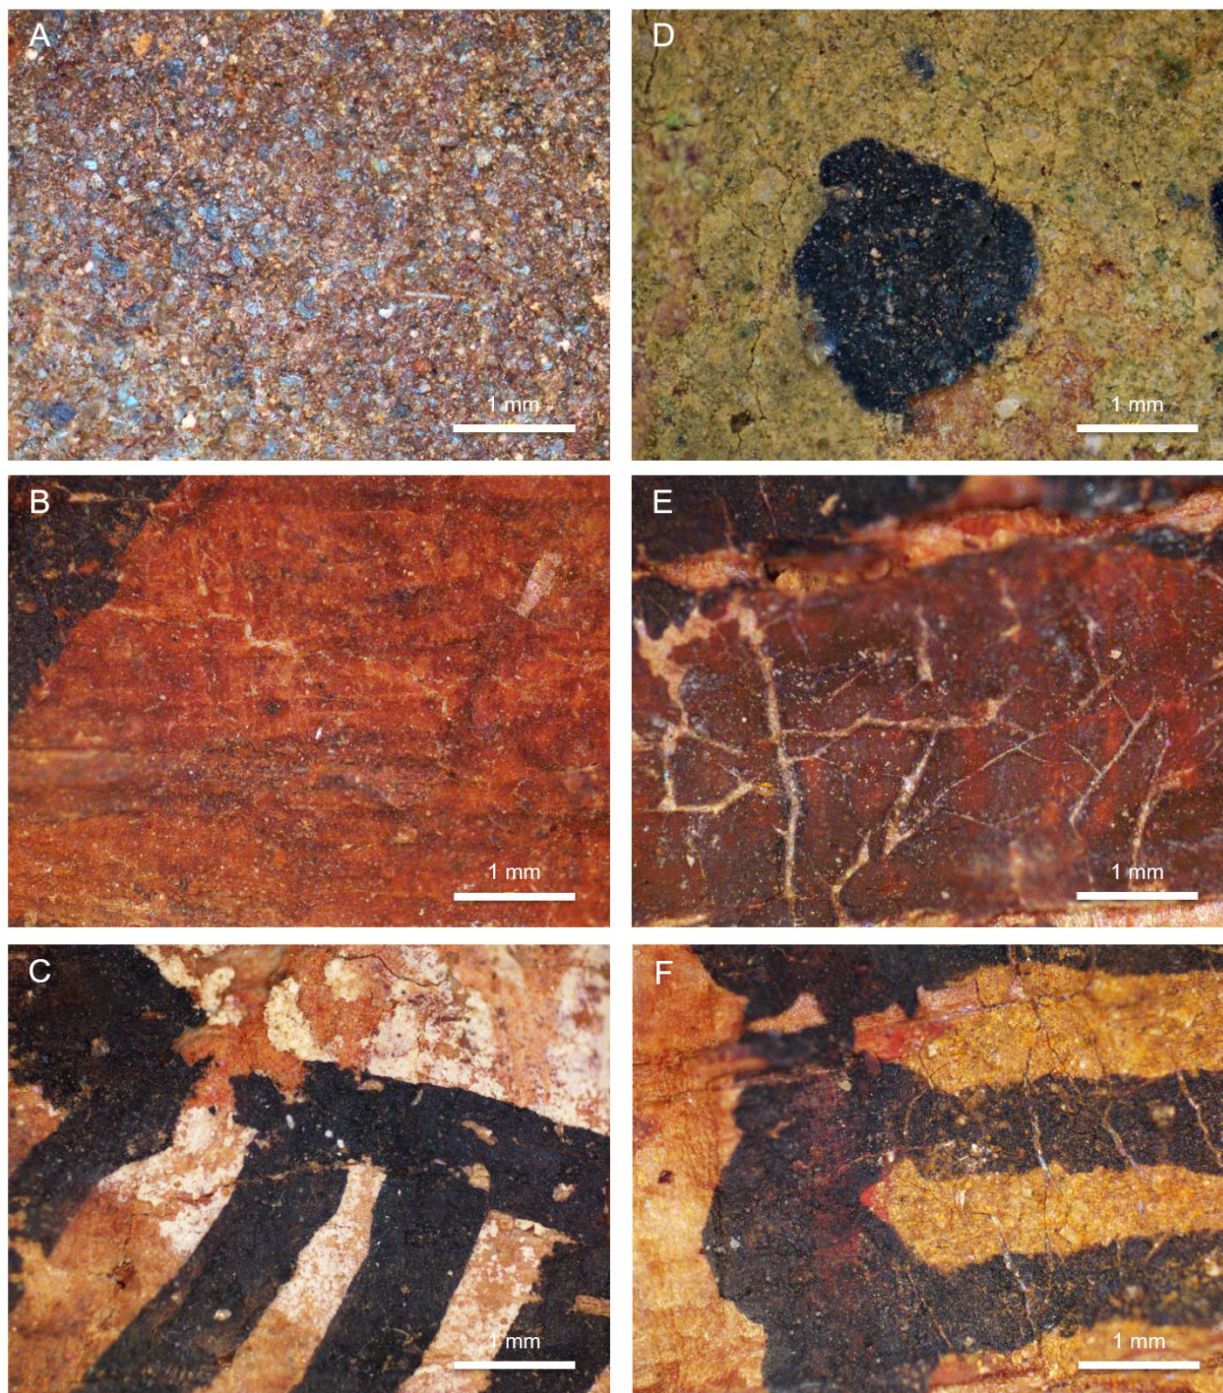

**Figure S1.** Optical microscopy images recorded on PAP-6 (A, B, C) and PAP-12 (D, E, F). A. Detail of the blue cap of the God, with large blue crystals. B. Detail of the red arm of the God. C. Detail of the white cloth of the deceased, and of the decorating black stripes. D. Detail of one of the black dots decorating the column, with a few blue crystals dispersed over it. E. Detail of the red solar disk of the cobra, showing some cracks. F. Detail of the column, where the red layer corresponding to the preparatory drawing can be seen under the black contour line.

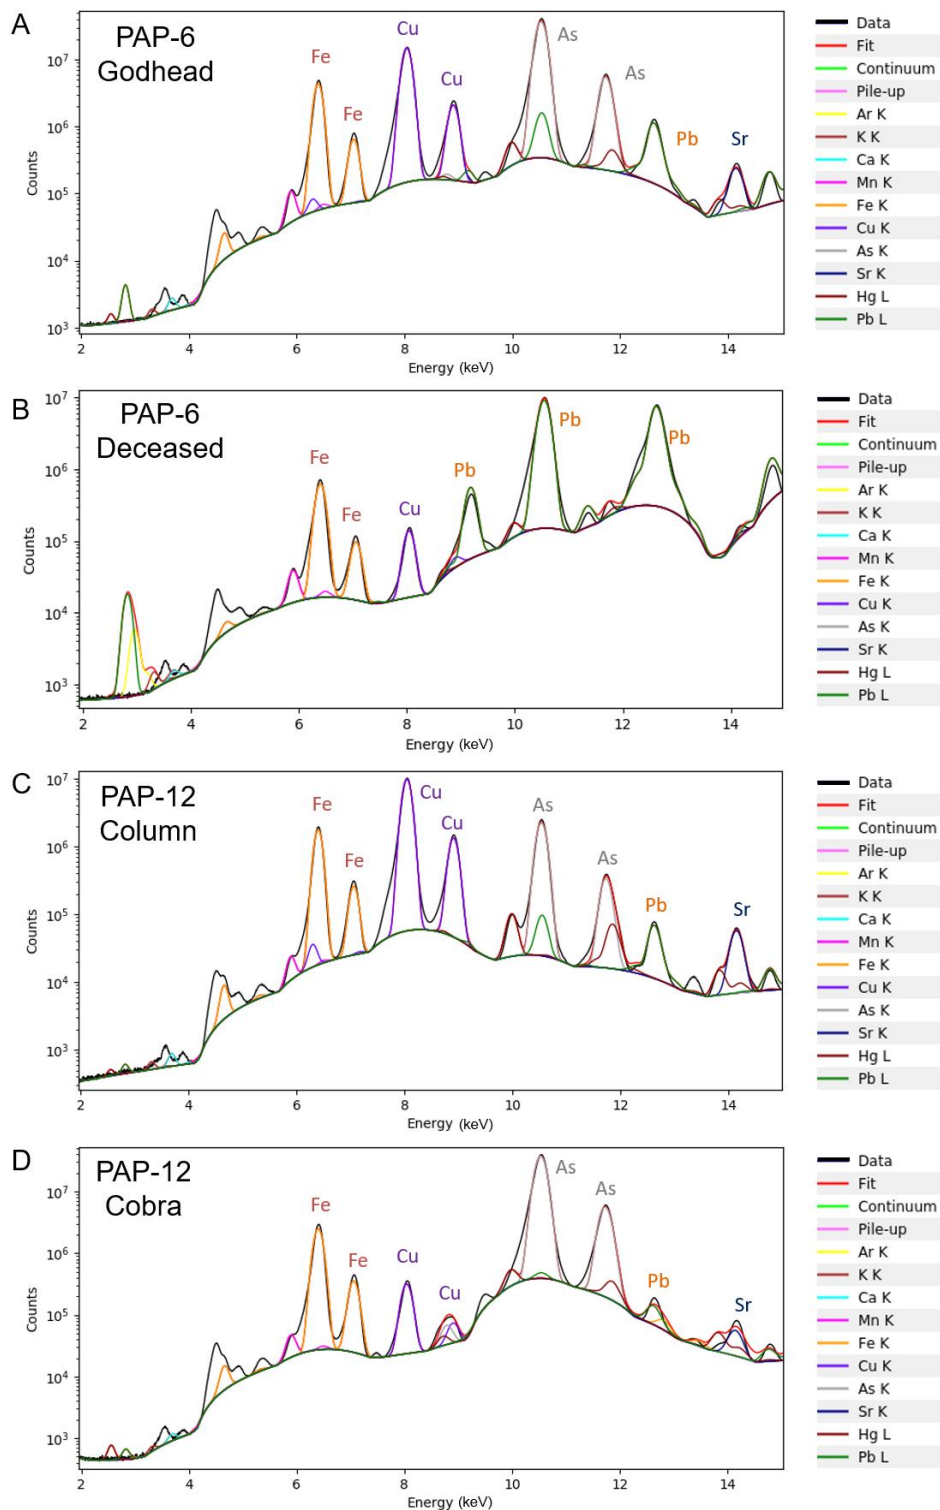

**Figure S2.** Sum spectra obtained from the X-ray fluorescence maps. A, Godhead (PAP-6); B, arm of the deceased (PAP-6); C, column (PAP-12); D, cobra head (PAP-12).

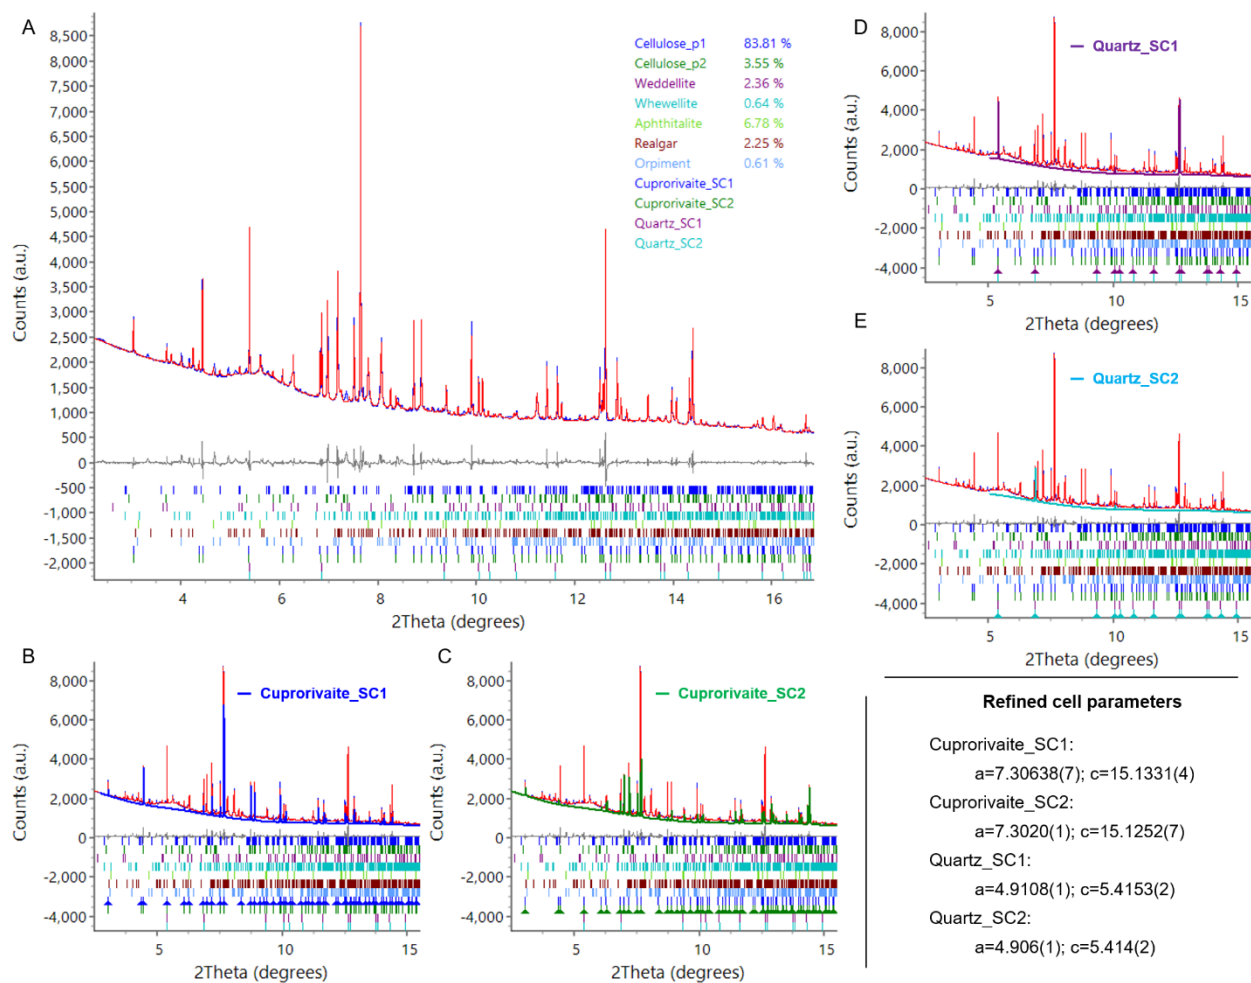

**Figure S3.** A. Combined Rietveld and Pawley refinements carried out against a diffraction pattern recorded on PAP-6 (X-10285, see Fig. S7) on the blue cap of the God ( $R_{wp}$ : 2.82%,  $R_{exp}$ : 0.86%, thin blue line: measured data, red line: calculated pattern, grey line: difference). Cellulose\_p1 and Cellulose\_p2 correspond to two different phases of cellulose. Cuprorivaite and quartz, present as large crystals, were modelled through Pawley fitting. When a large crystal is in the diffracting volume, single-crystal (SC) diffraction spots are recorded on 2D diffraction images, resulting in really sharp peaks after integration. A few large crystals will result in additional sharp peaks slightly shifted from each other for the same reflection. In the present case, this effect was taken into account by introducing two different phases of cuprorivaite (B and C, Cuprorivaite\_SC1 and Cuprorivaite\_SC2) and of quartz (D and E, Quartz\_SC1 and Quartz\_SC2), with slightly different refined values of their respective cell parameters, allowing quite different reflection intensities to be fitted.

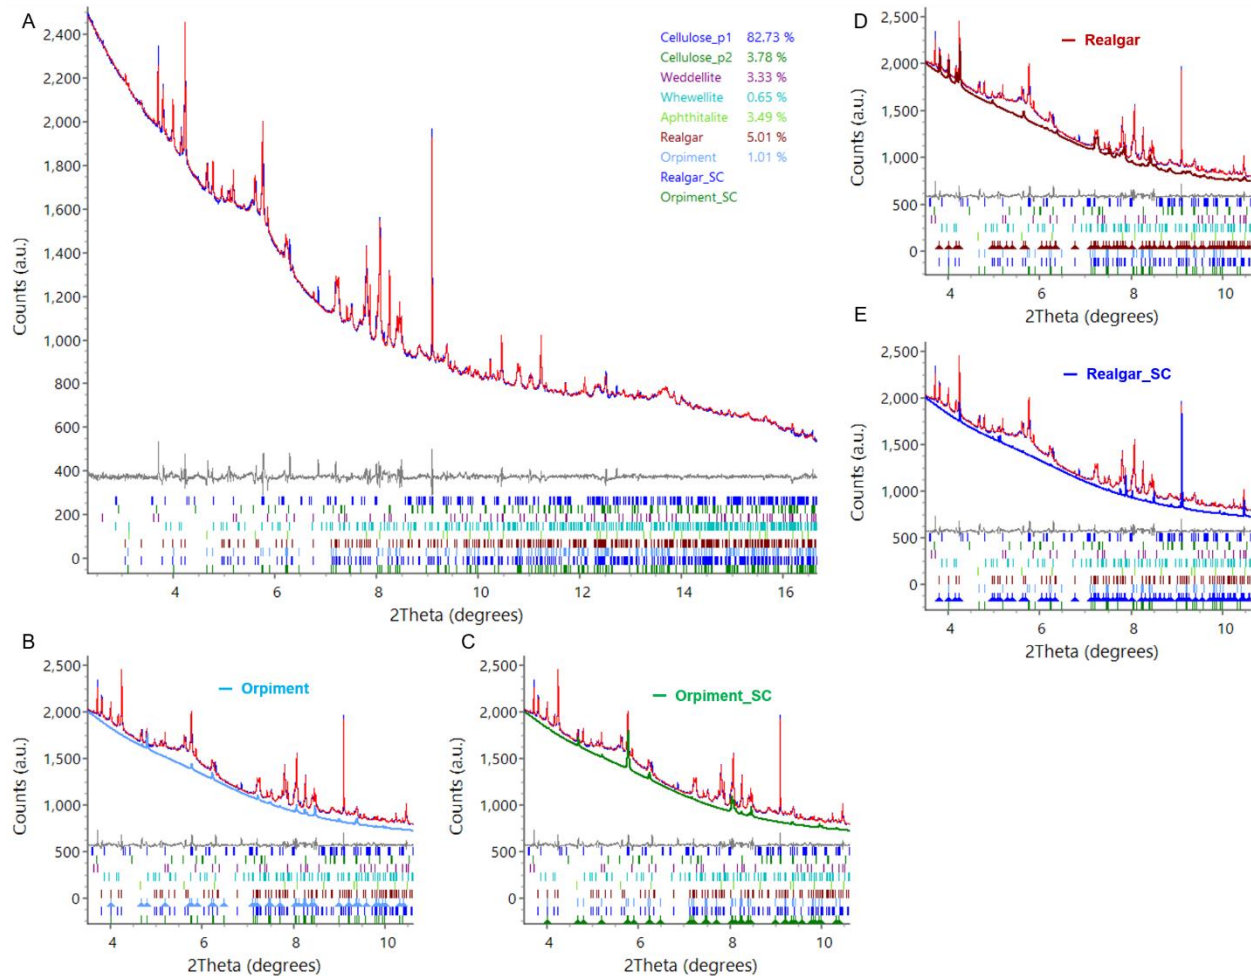

**Figure S4.** A. Combined Rietveld and Pawley refinements carried out against a diffraction pattern recorded on PAP-6 (X-11535, see Fig. S7) in the yellow region of the God face ( $R_{wp}$ : 1.05%,  $R_{exp}$ : 0.89%, thin blue line: measured data, red line: calculated pattern, grey line: difference). The orpiment and realgar phases found in the yellow regions are present as both large and smaller-size crystals. In the current example, for each of the orpiment and realgar phases, two phases were introduced, the first ones entering into the Rietveld refinement (Orpiment and Realgar in B and D, respectively), and the second ones modelled through Pawley fitting (Orpiment\_SC and Realgar\_SC in C and E, respectively, SC indicating a single-crystal contribution). The refinement was done in two steps. In the first step, scale factors of all the phases part of the Rietveld refinement were refined. Then, the scale factors of the orpiment and of the realgar phases were fixed, and the second phases modelled through Pawley fitting were introduced.

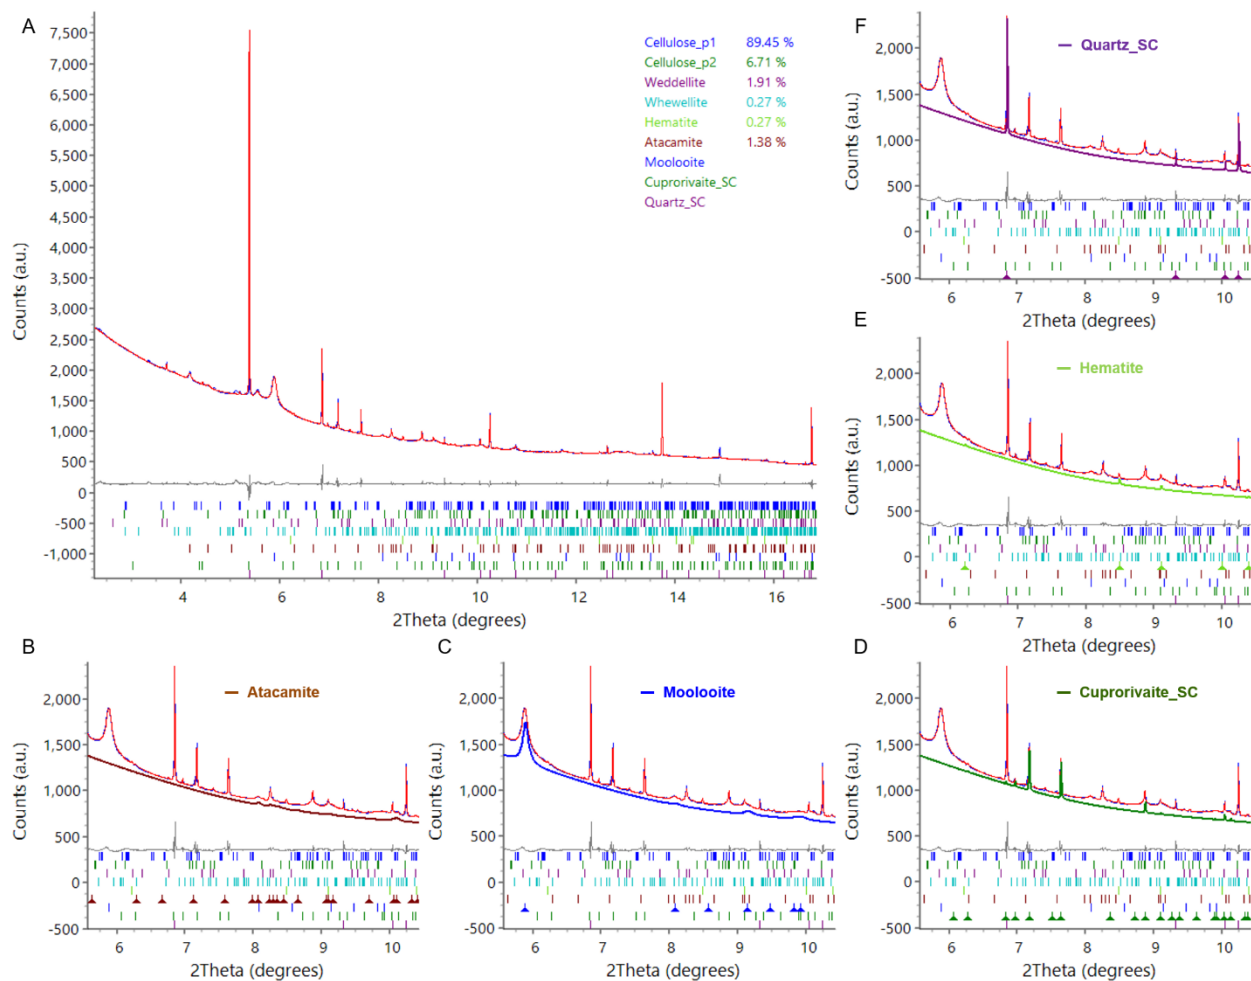

**Figure S5.** Combined Rietveld and Pawley refinements carried out against a diffraction pattern recorded on PAP-12 (X-17500, see Fig. S7) on one of the dark dots decorating the column ( $R_{wp}$ : 1.30%,  $R_{exp}$ : 0.55%, thin blue line: measured data, red line: calculated pattern, grey line: difference). In addition to the two phases of cellulose (p1 and p2), weddellite and whewellite, the phases of atacamite (B), moolooite (C), cuprorivaite (D), hematite (E), and quartz (F) are also present.

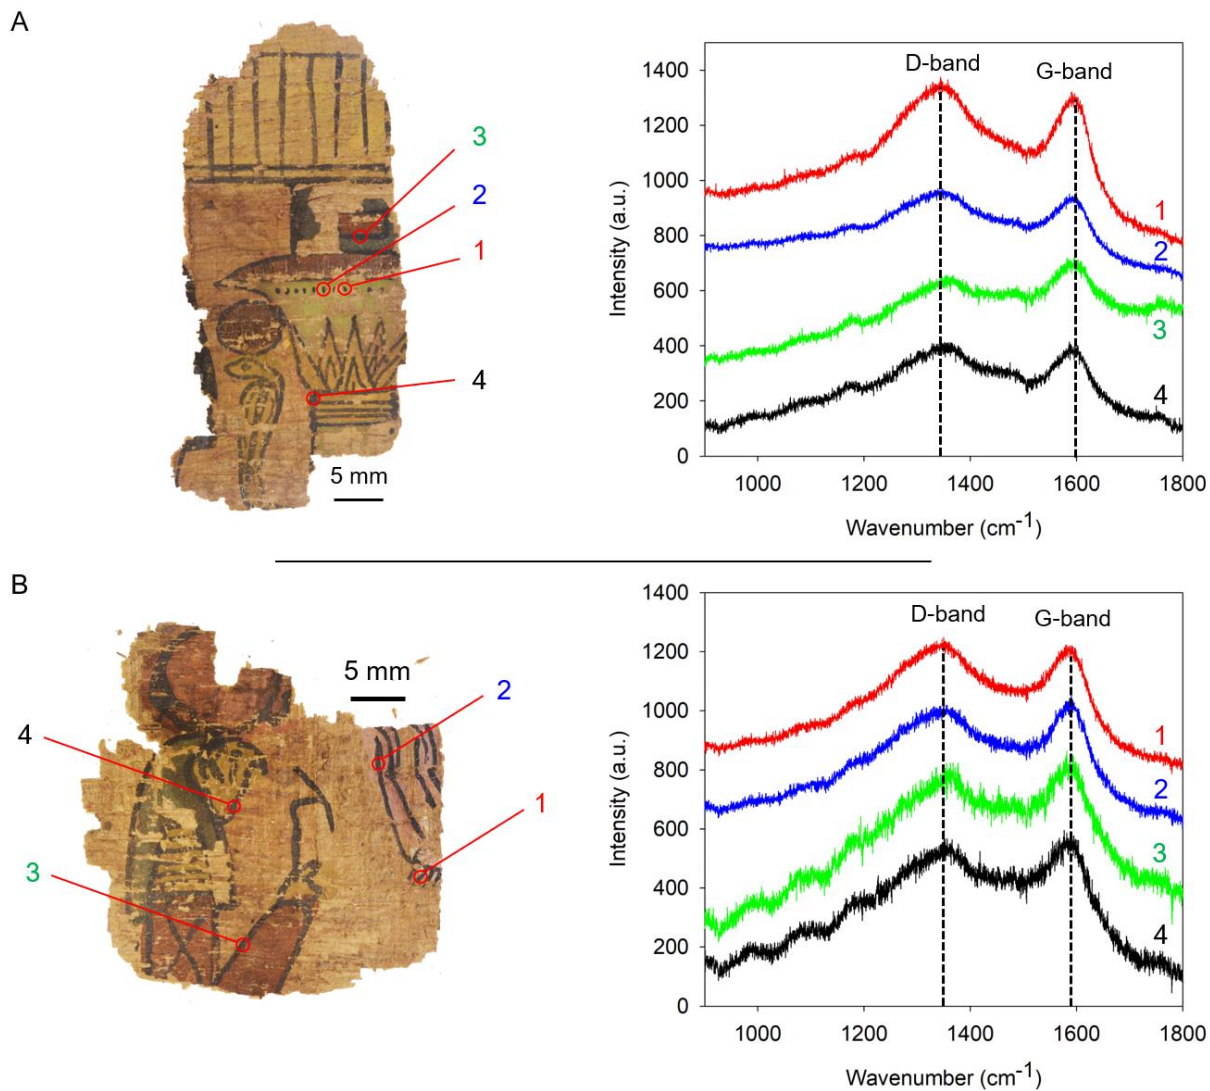



## Refinement results - Introduction

The diffraction patterns collected over PAP-6 and PAP-12 were processed through combined Rietveld and Pawley refinements. The number of patterns refined and their positions on the four papyrus fragments are given in Fig. S7. Phases modelled through Pawley refinements are indicated with “\_SC” in their name. Moolooite, for which we did not find information about the structural model, was also included through Pawley fitting. The two phases of cellulose are indicated as “Cellulose\_p1” and “Cellulose\_p2”. A semi-amorphous phase, noted “UP” for “Unidentified Phase” and approximated to  $K_2CO_3$  for the time being, was included in the refinements against the patterns collected on the arm of the deceased. Peak profiles of the different phases were modelled with a pseudo-Voigt function. Cell parameters, peak profile parameters, scale factors (in the case of Rietveld) or reflection intensities (in the case of Pawley) were allowed to vary. All the refinements are shown in the next pages (blue: measured data, red: calculated pattern, grey: difference).

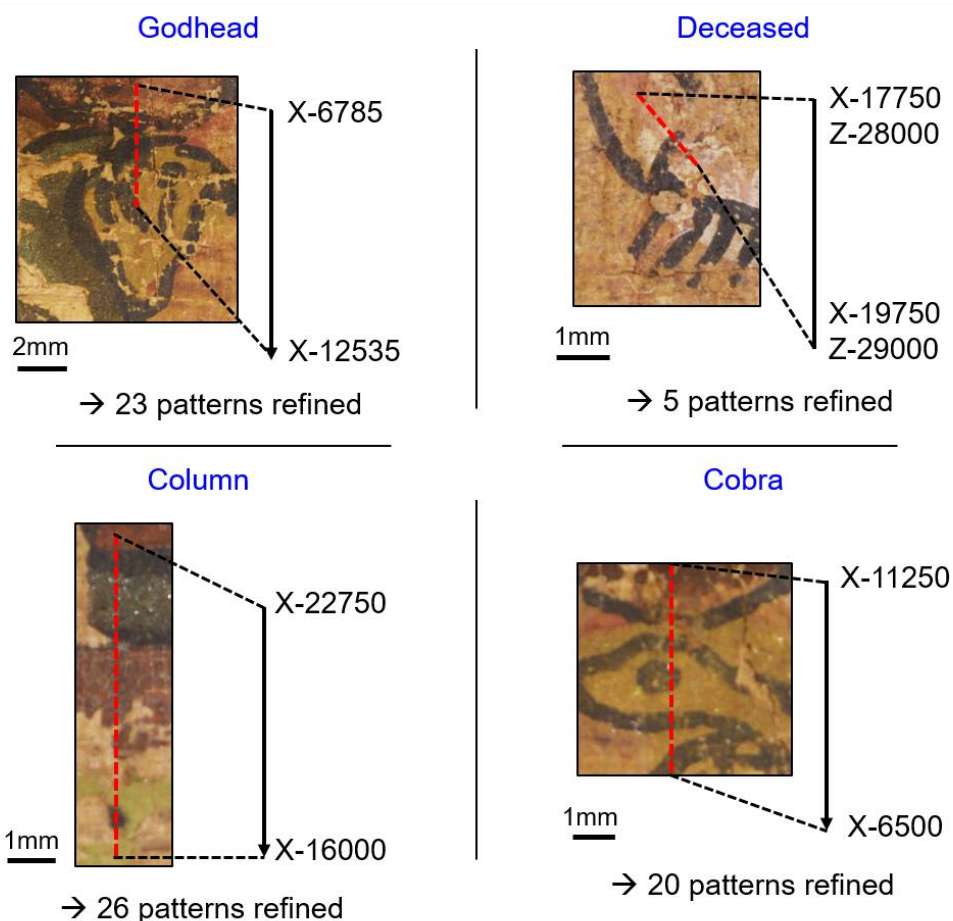

**Figure S7.** Powder diffraction patterns were collected along the four red lines over four different parts of PAP-6 (Godhead and arm of the deceased) and PAP-12 (column and cobra head). The labeled positions (in microns) as well as the number of patterns refined are indicated.

## Refinement results – Godhead

PAP-6 Godhead X-6785 ( $R_{wp}$  0.97%,  $R_{exp}$  0.93%)

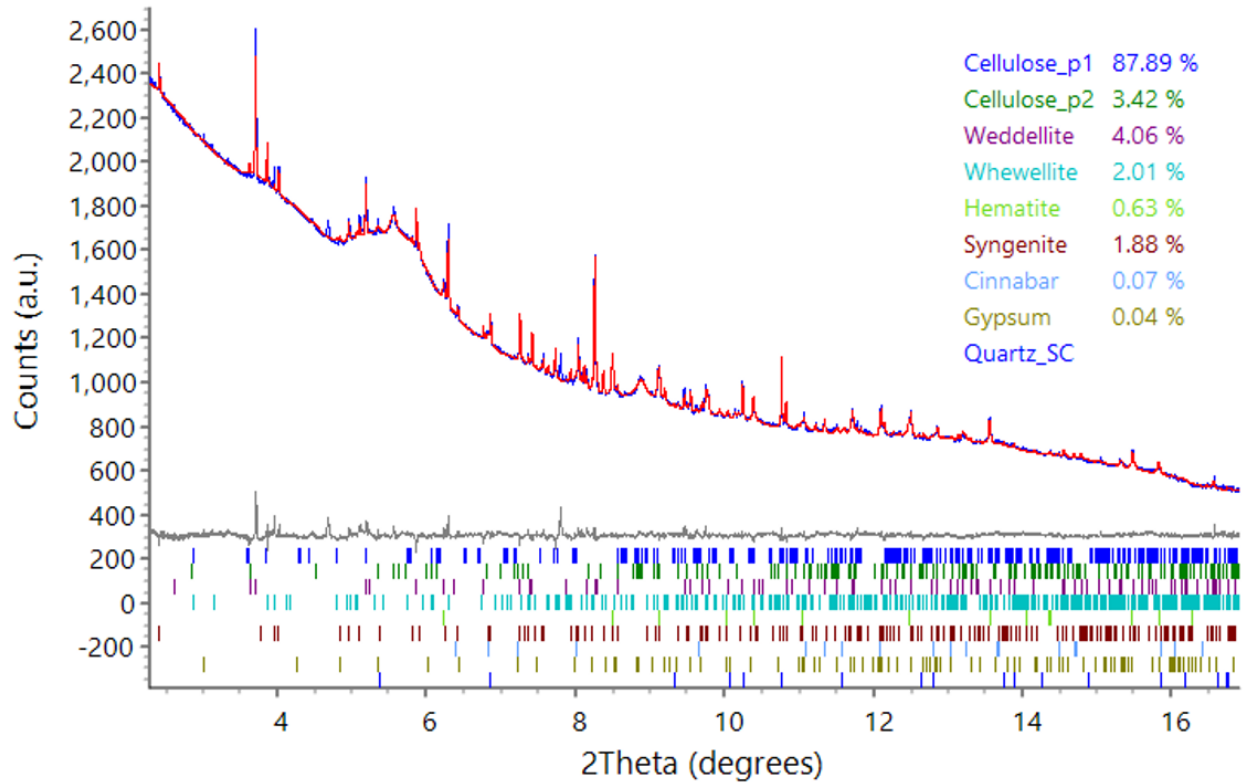

PAP-6 Godhead X-7035 ( $R_{wp}$  0.97%,  $R_{exp}$  0.85%)

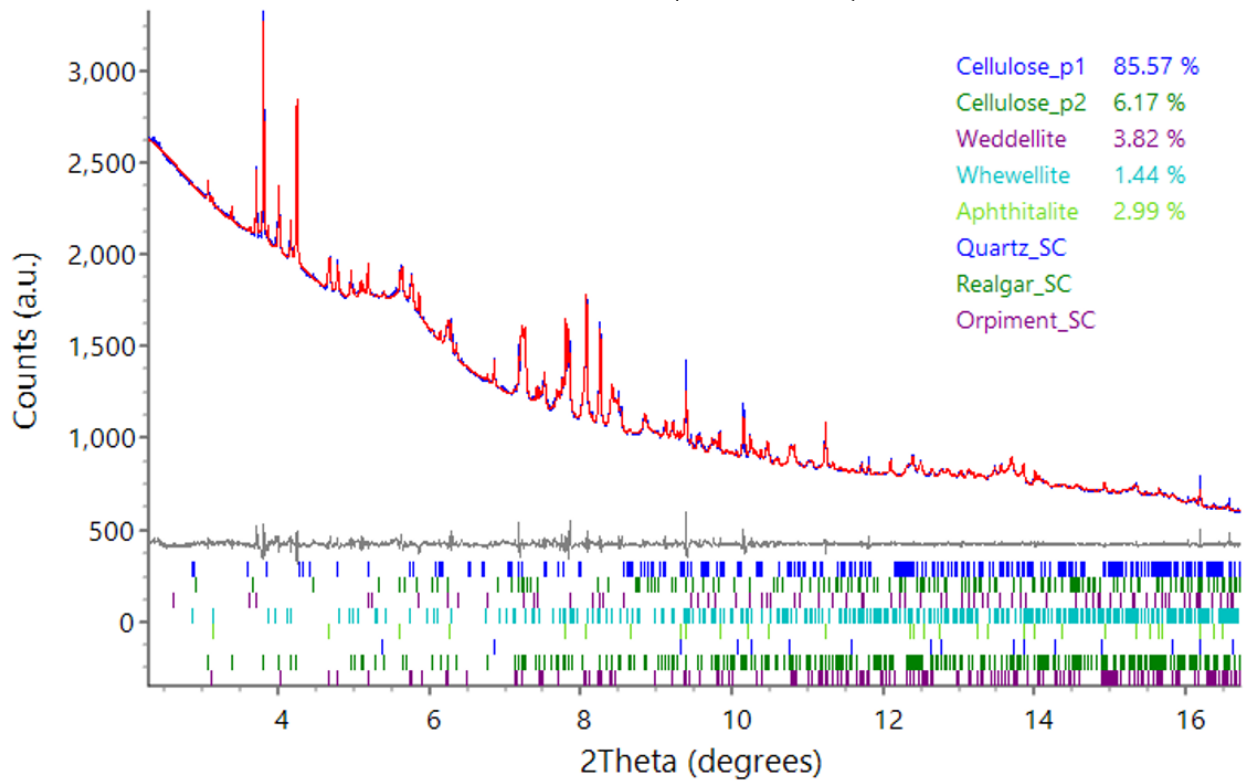

PAP-6 Godhead X-7285 ( $R_{wp}$  1.07%,  $R_{exp}$  0.99%)

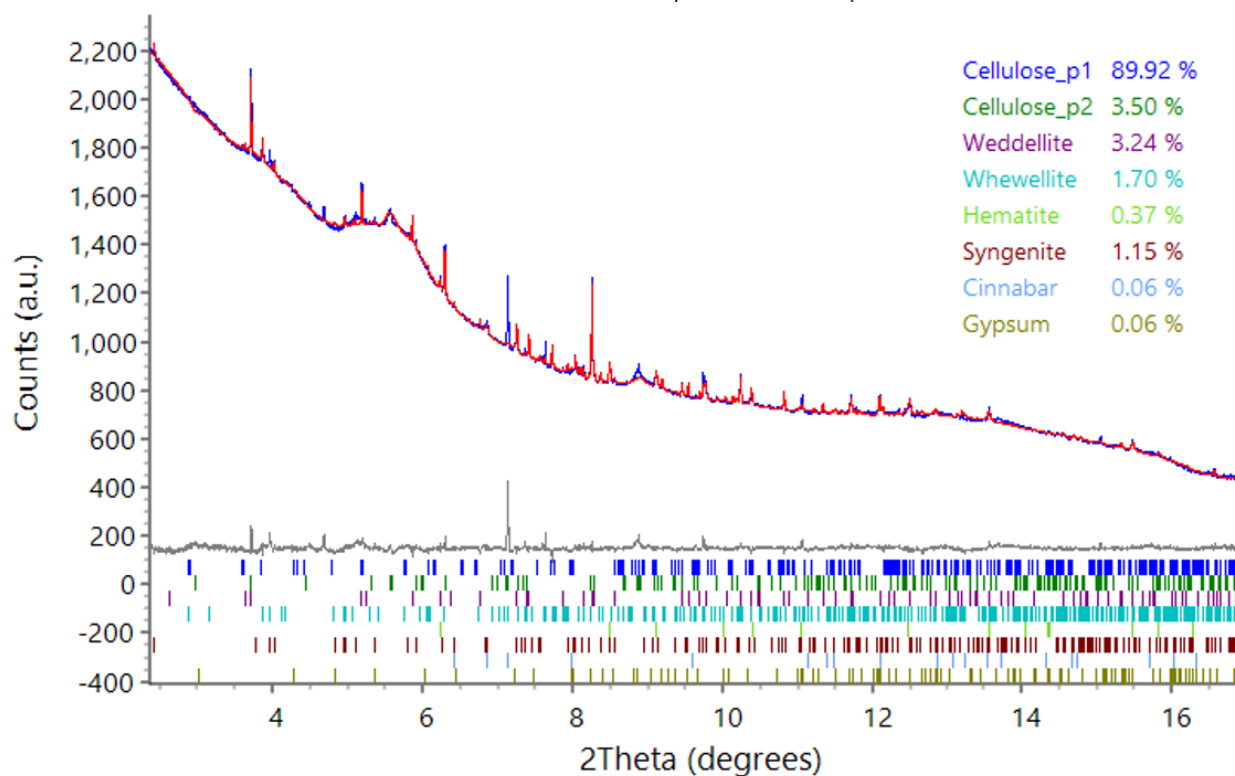

PAP-6 Godhead X-7535 ( $R_{wp}$  0.96%,  $R_{exp}$  0.93%)

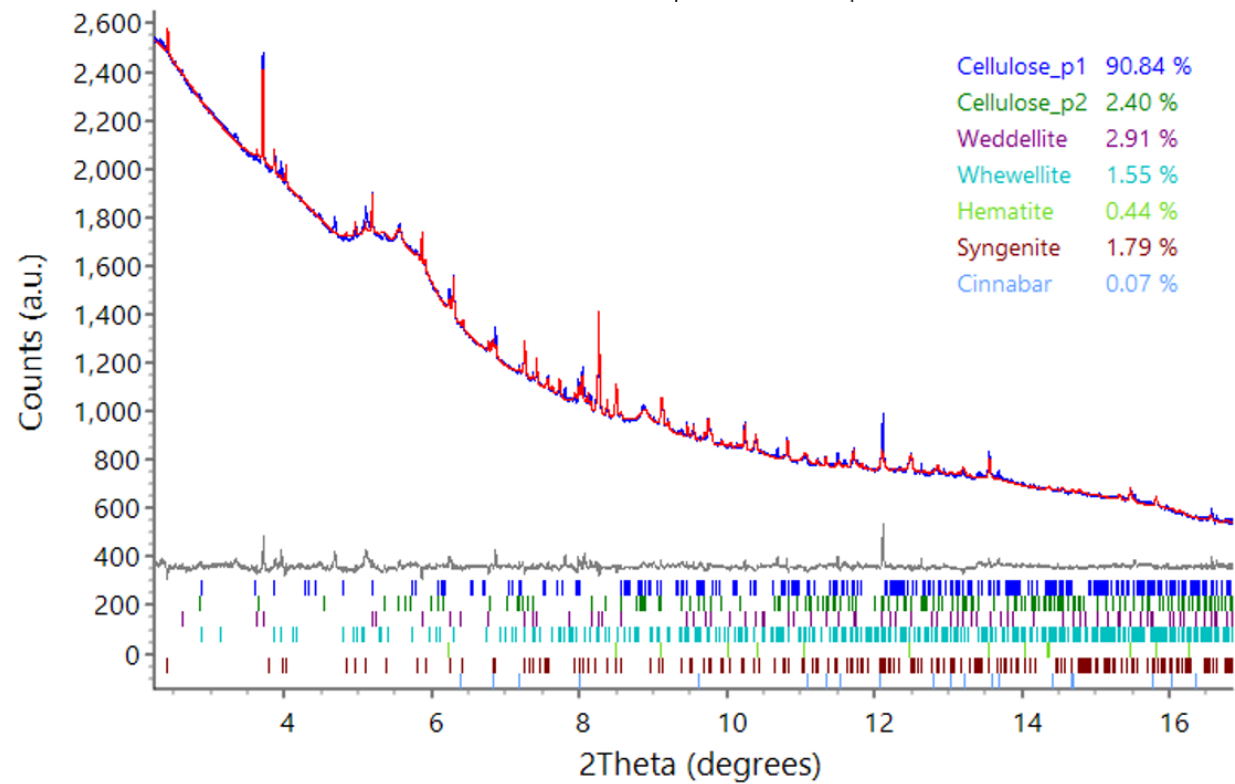

PAP-6 Godhead X-7785 ( $R_{wp}$  1.05%,  $R_{exp}$  0.99%)

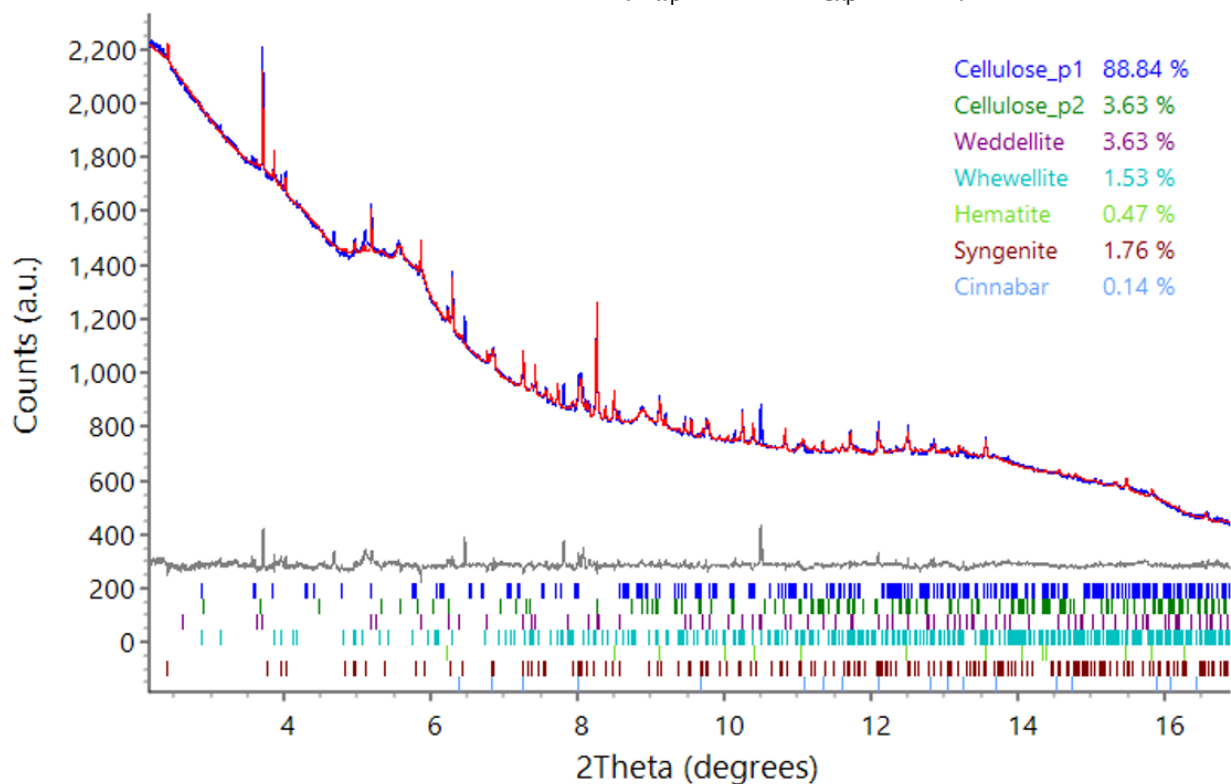

PAP-6 Godhead X-8035 ( $R_{wp}$  1.21%,  $R_{exp}$  0.93%)

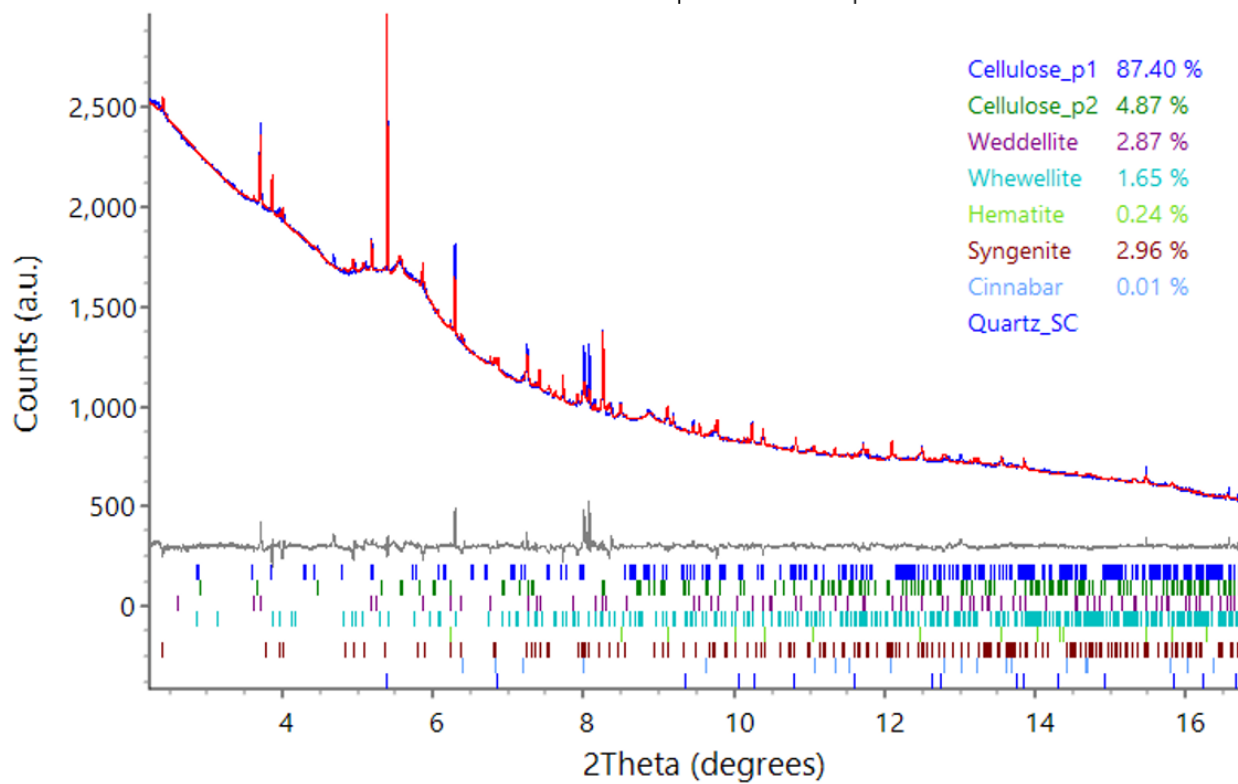

PAP-6 Godhead X-8285 ( $R_{wp}$  0.90%,  $R_{exp}$  0.78%)

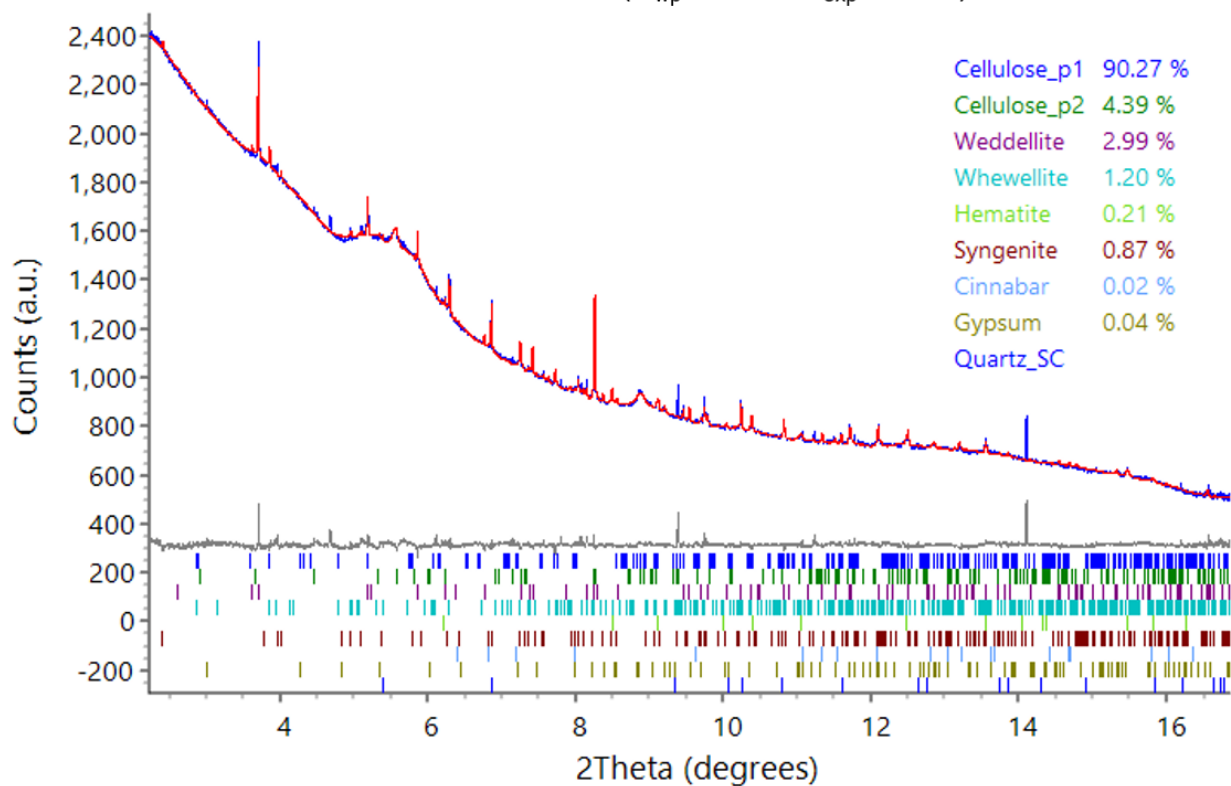

PAP-6 Godhead X-8535 ( $R_{wp}$  0.90%,  $R_{exp}$  0.75%)

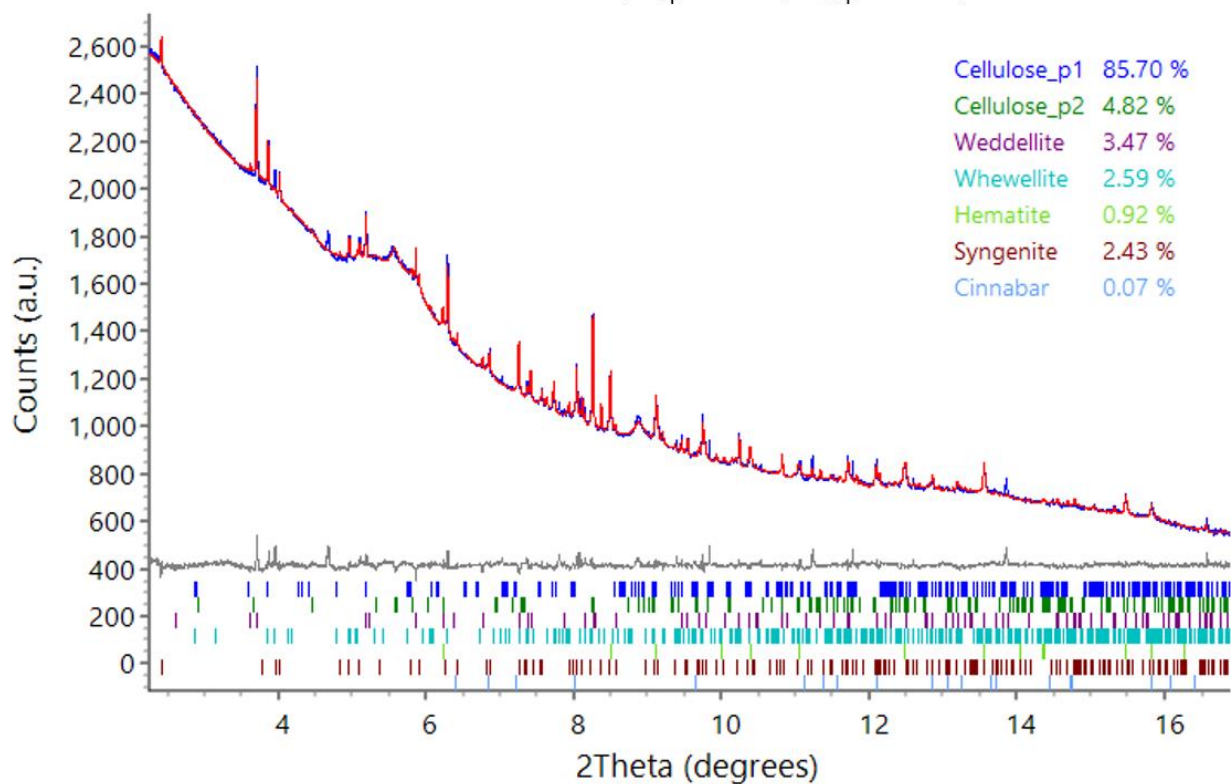

PAP-6 Godhead X-8785 ( $R_{wp}$  1.00%,  $R_{exp}$  0.90%)

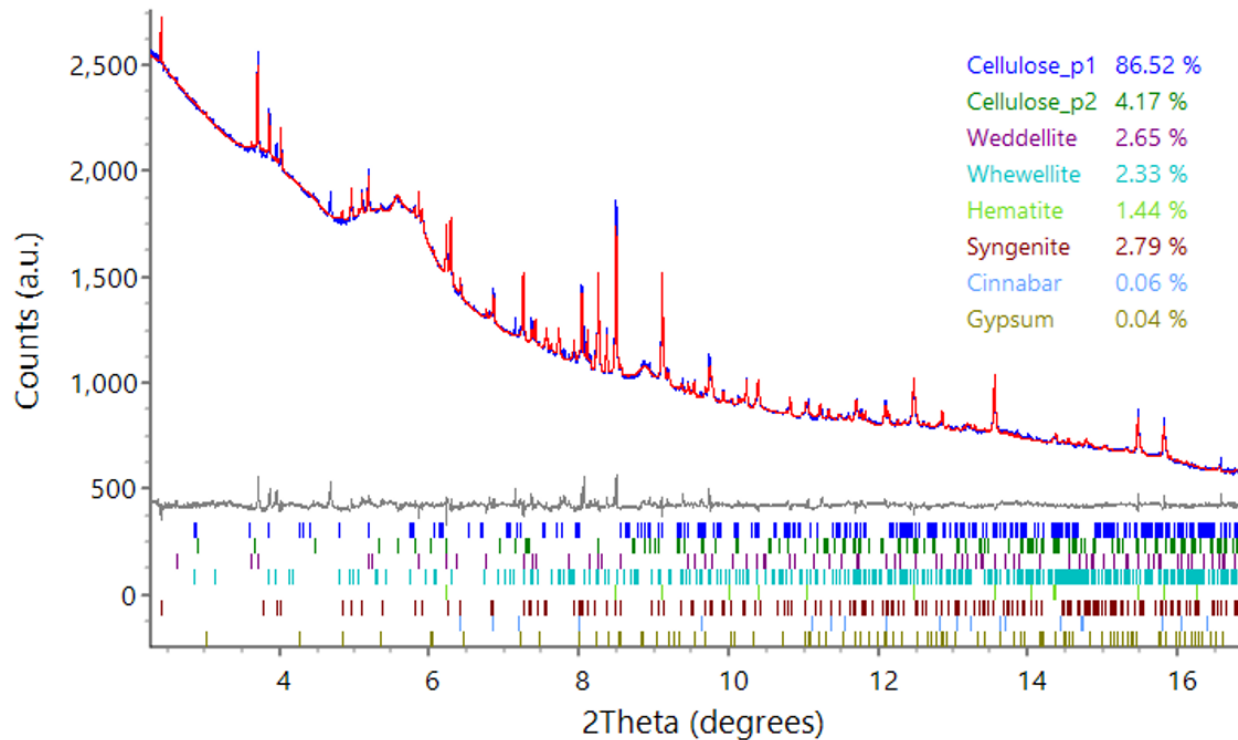

PAP-6 Godhead X-9035 ( $R_{wp}$  1.23%,  $R_{exp}$  0.89%)

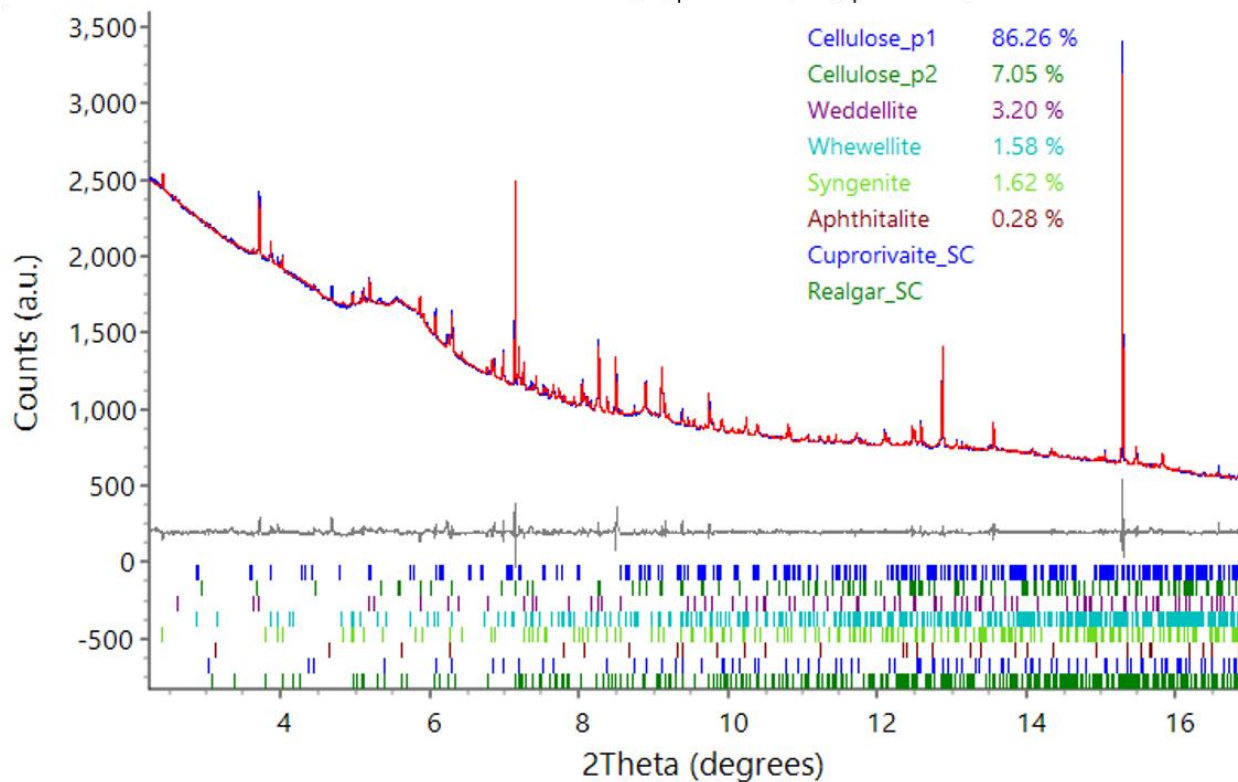

PAP-6 Godhead X-9285 ( $R_{wp}$  3.29%,  $R_{exp}$  0.85%)

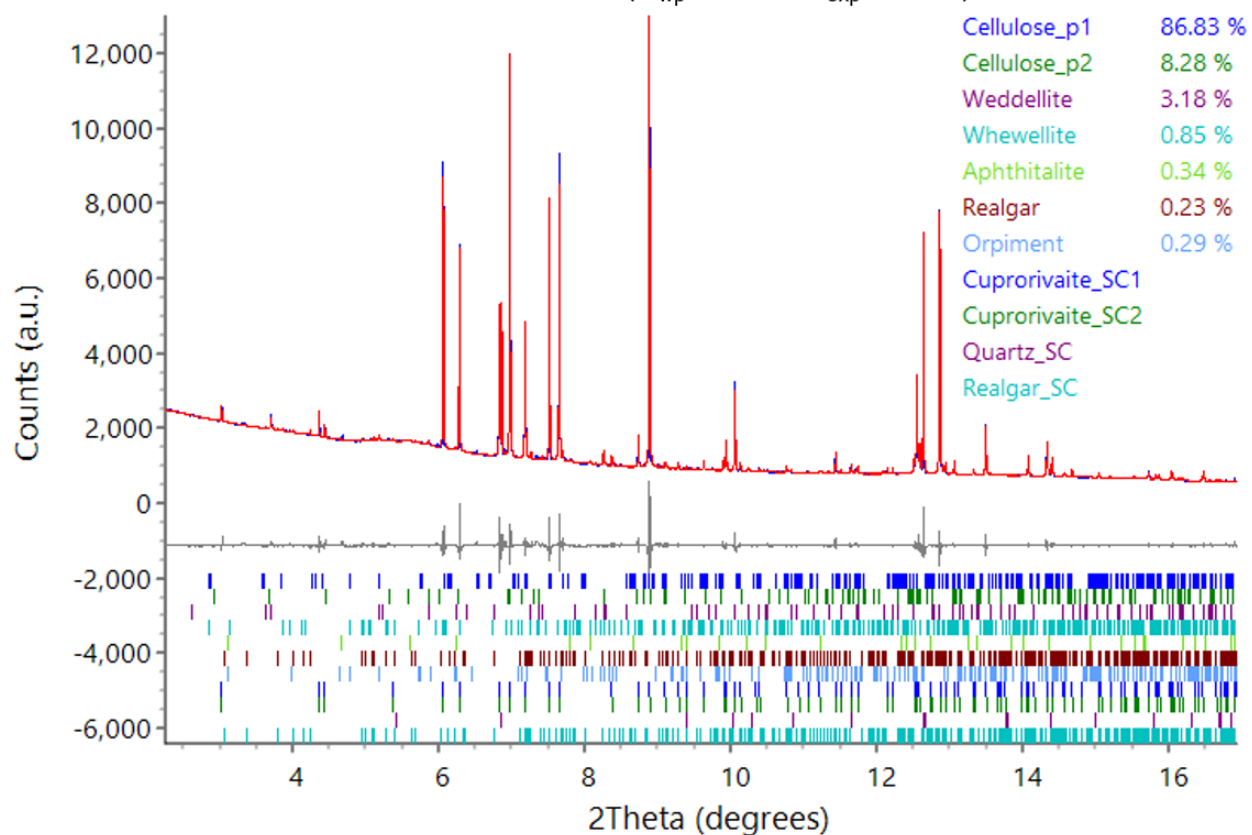

PAP-6 Godhead X-9535 ( $R_{wp}$  4.60%,  $R_{exp}$  0.82%)

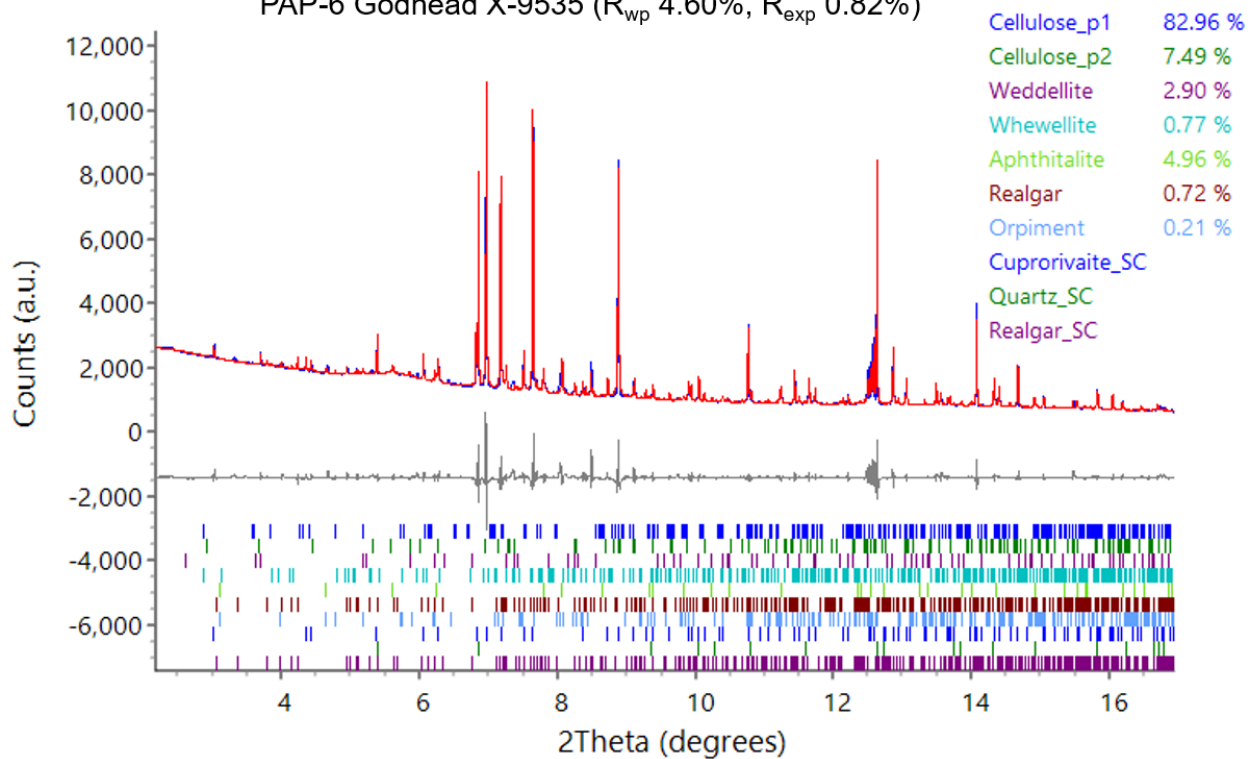

PAP-6 Godhead X-9785 ( $R_{wp}$  4.50%,  $R_{exp}$  0.82%)

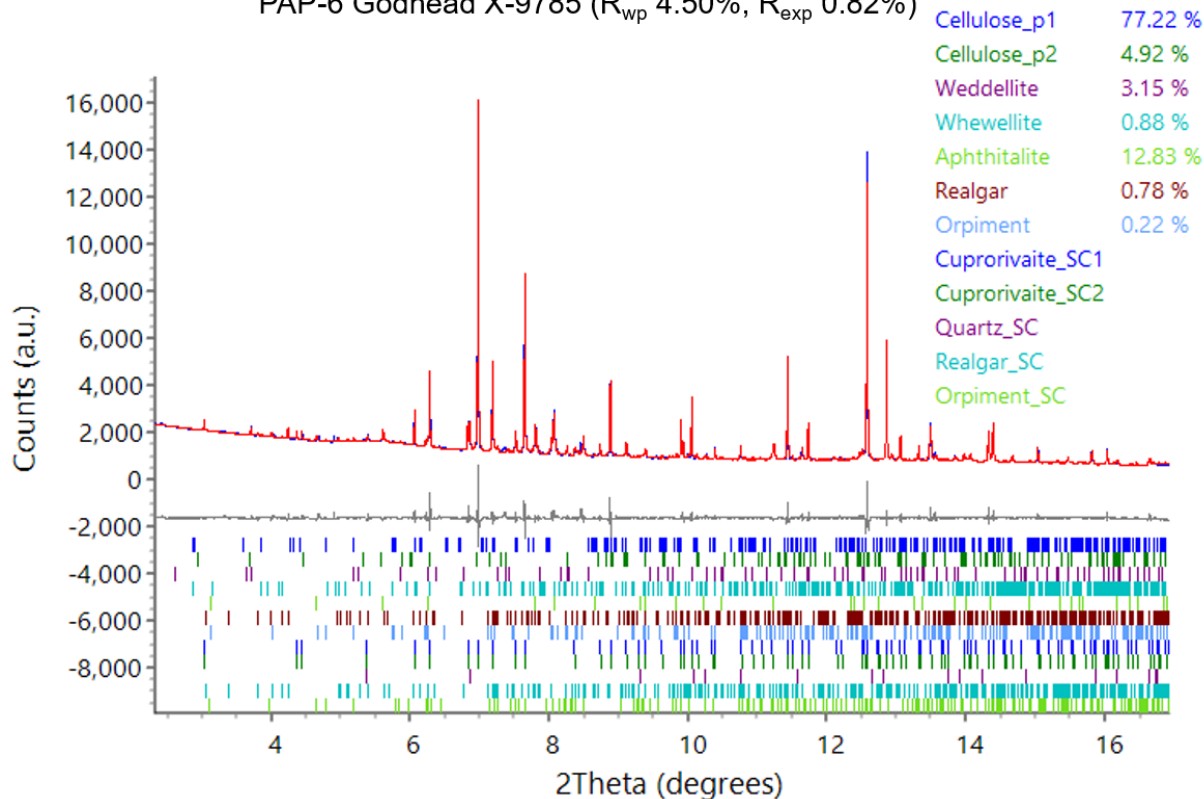

PAP-6 Godhead X-10035 ( $R_{wp}$  4.08%,  $R_{exp}$  0.81%)

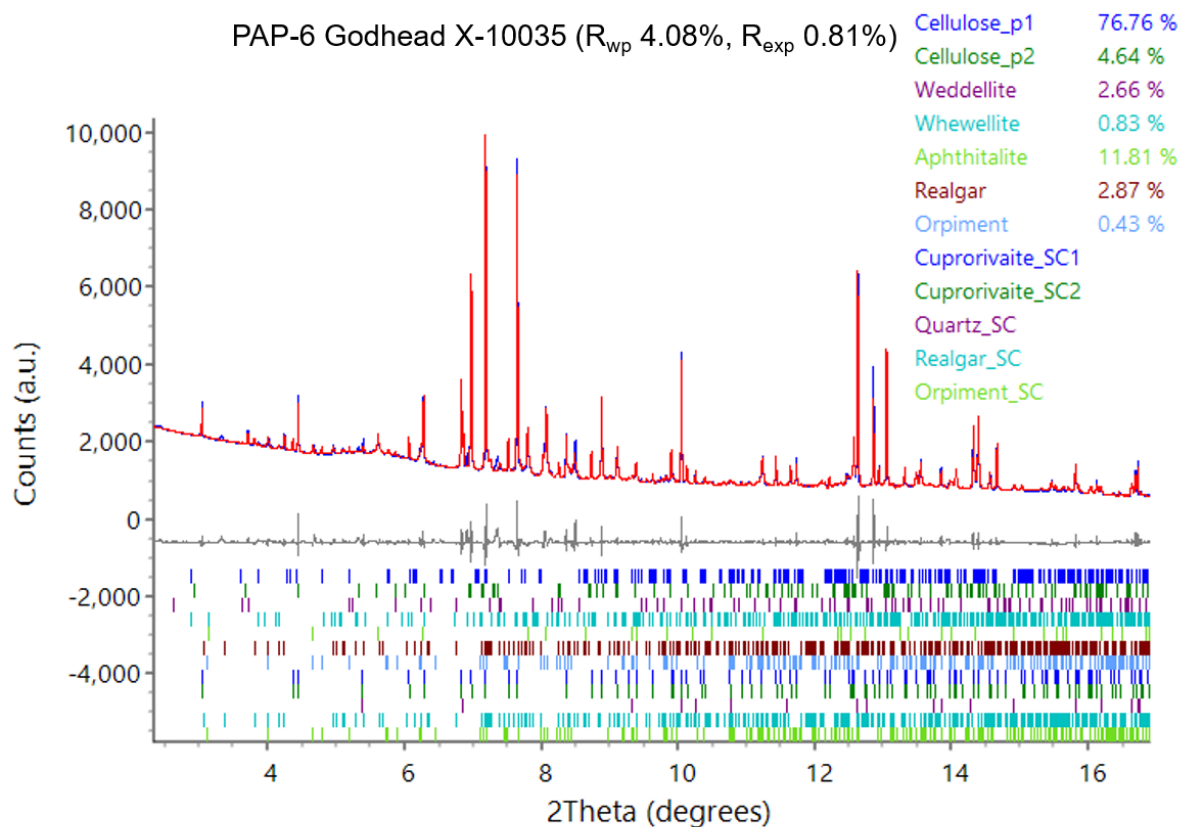



PAP-6 Godhead X-10285 ( $R_{wp}$  2.82%,  $R_{exp}$  0.86%)

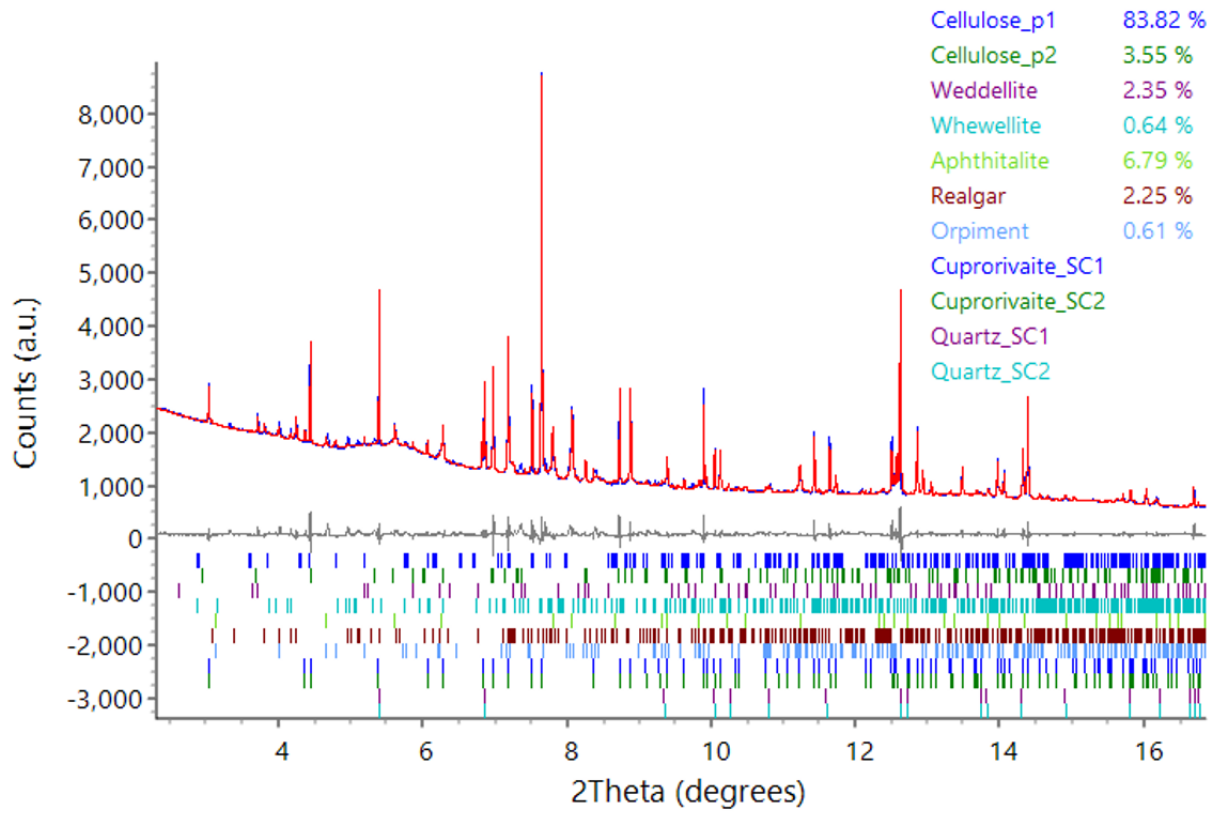

PAP-6 Godhead X-10535 ( $R_{wp}$  1.20%,  $R_{exp}$  0.86%)

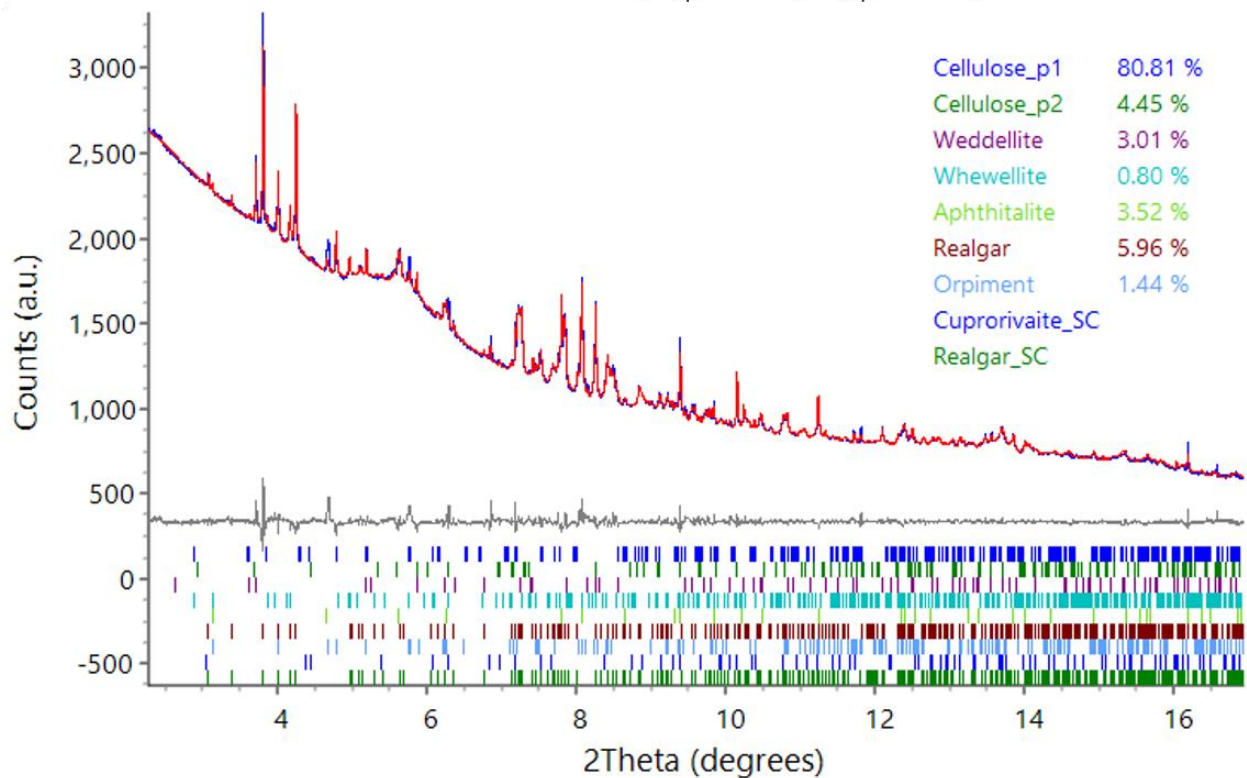

PAP-6 Godhead X-10785 ( $R_{wp}$  0.81%,  $R_{exp}$  0.75%)

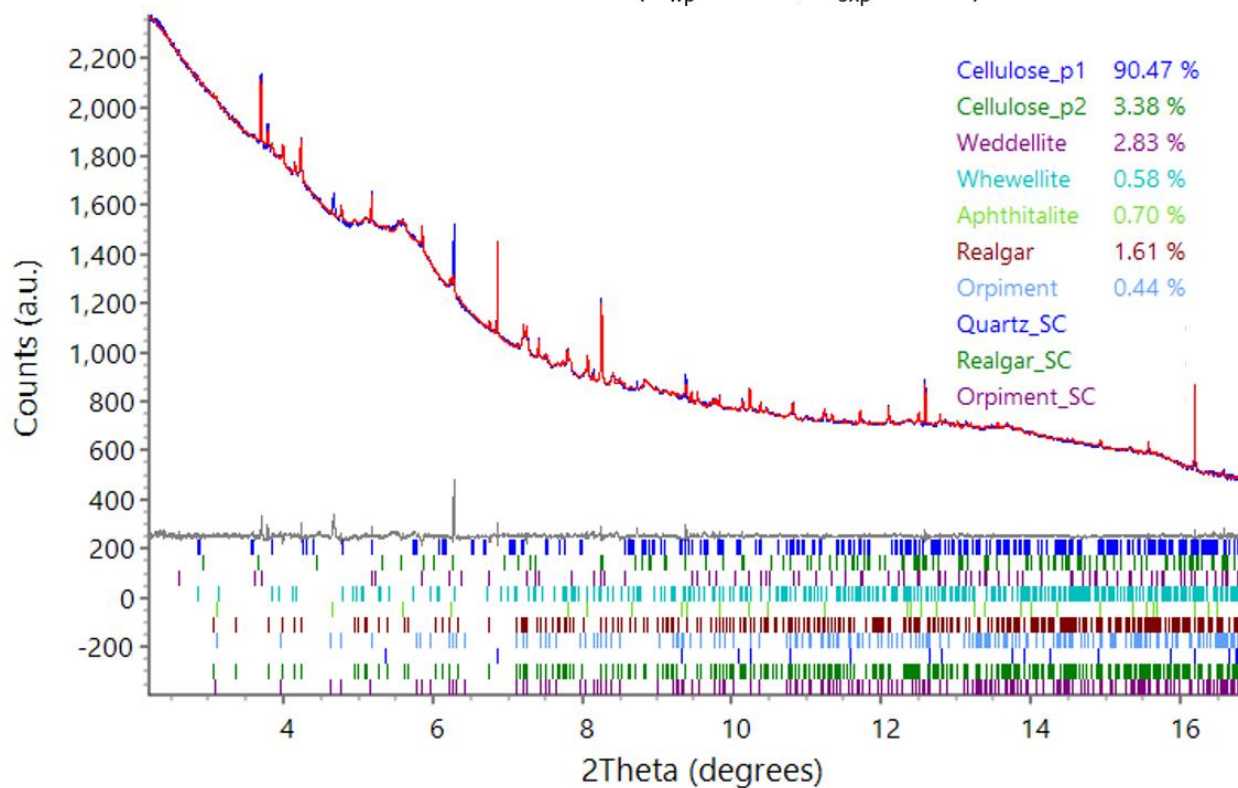

PAP-6 Godhead X-11285 ( $R_{wp}$  1.08%,  $R_{exp}$  0.90%)

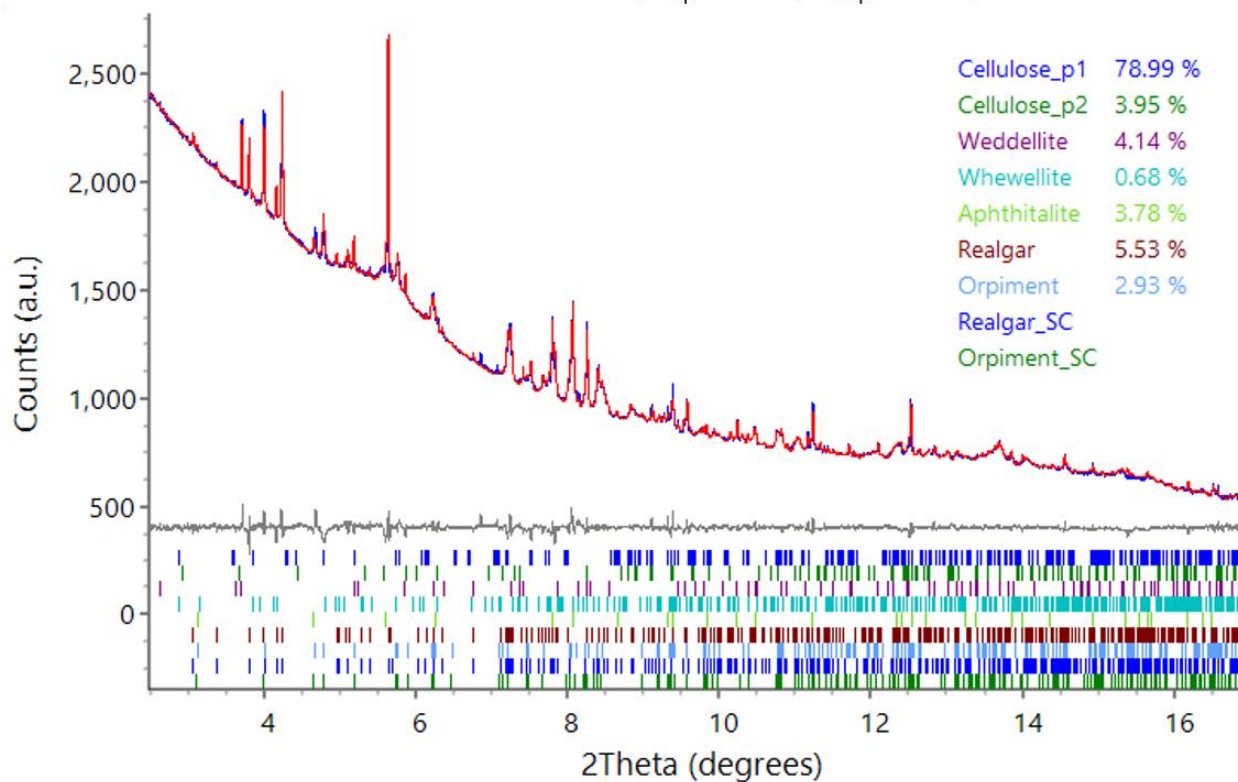

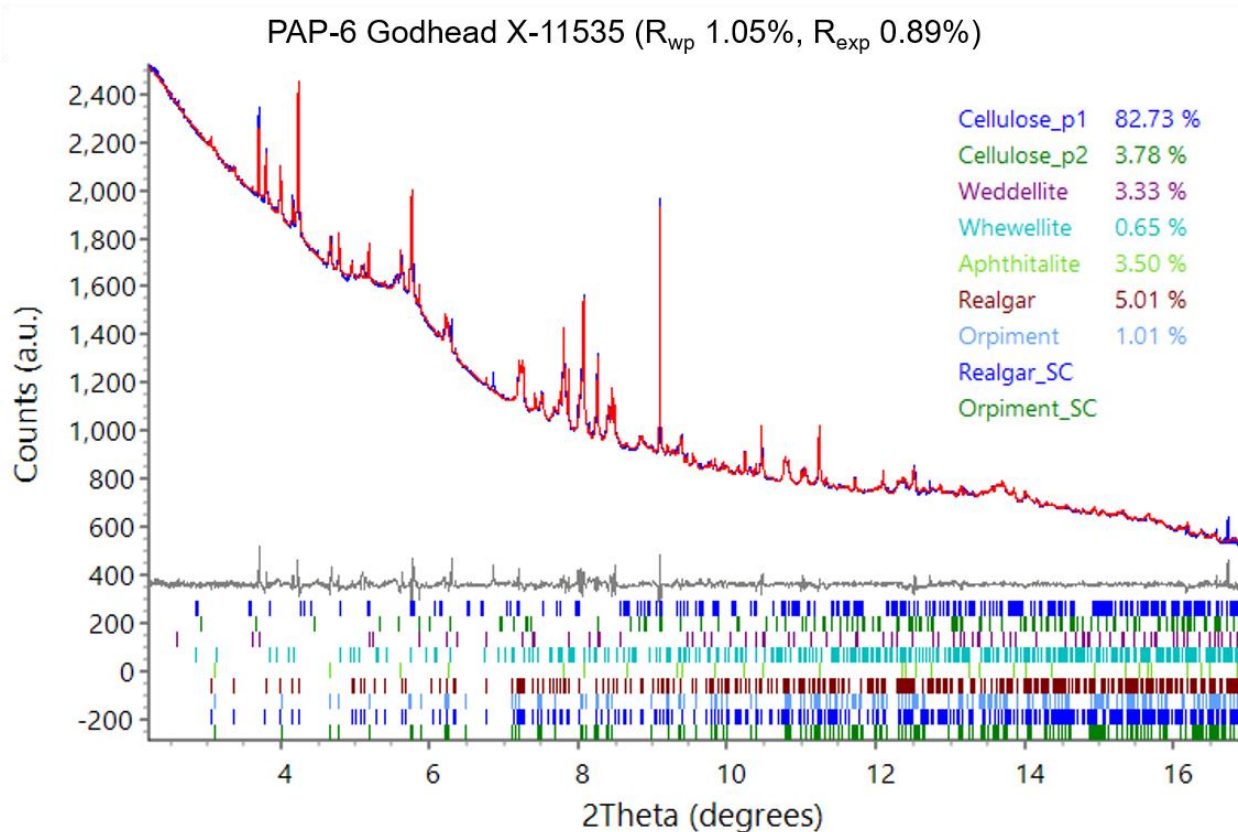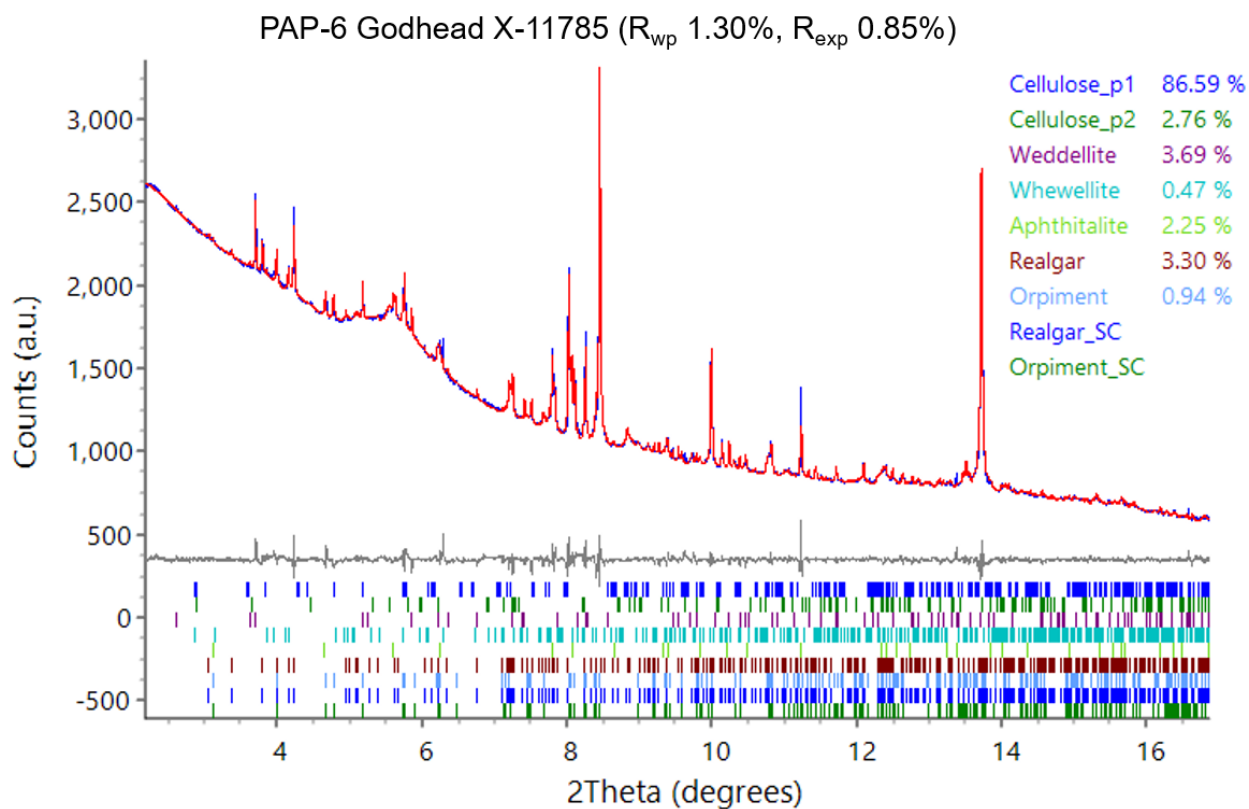

PAP-6 Godhead X-12035 ( $R_{wp}$  0.84%,  $R_{exp}$  0.79%)

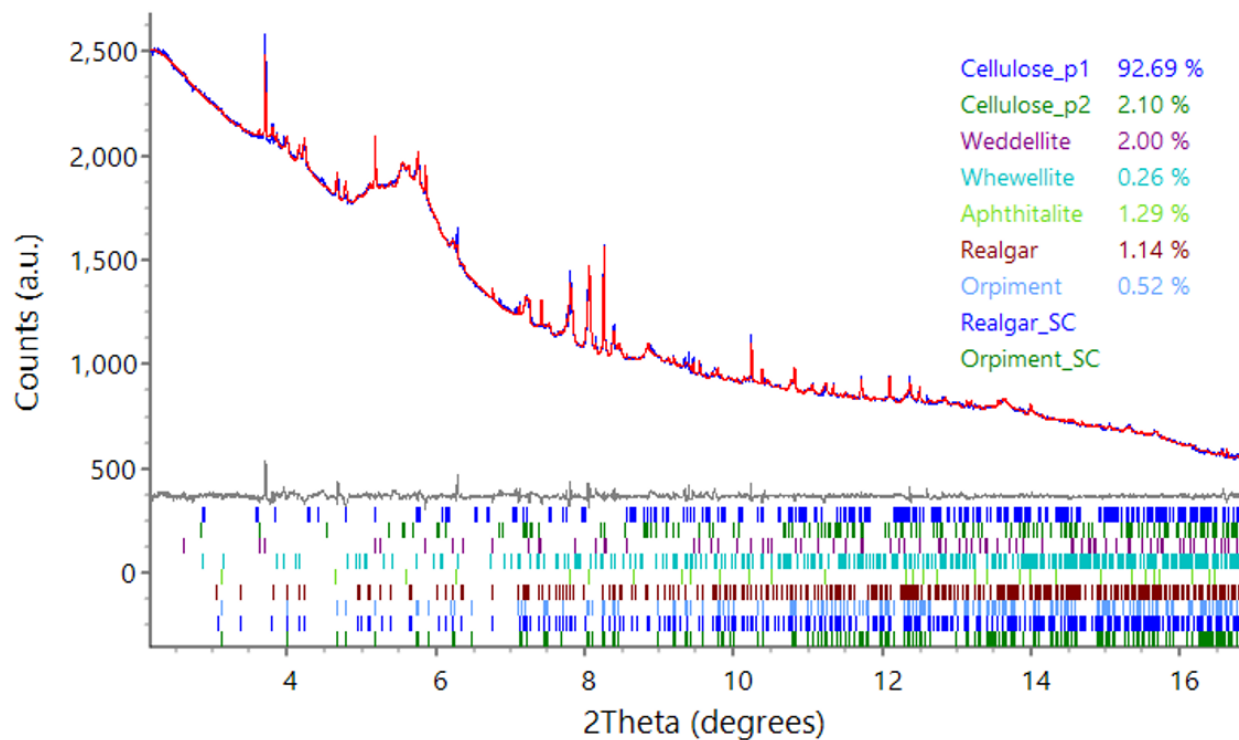

PAP-6 Godhead X-12285 ( $R_{wp}$  0.84%,  $R_{exp}$  0.82%)

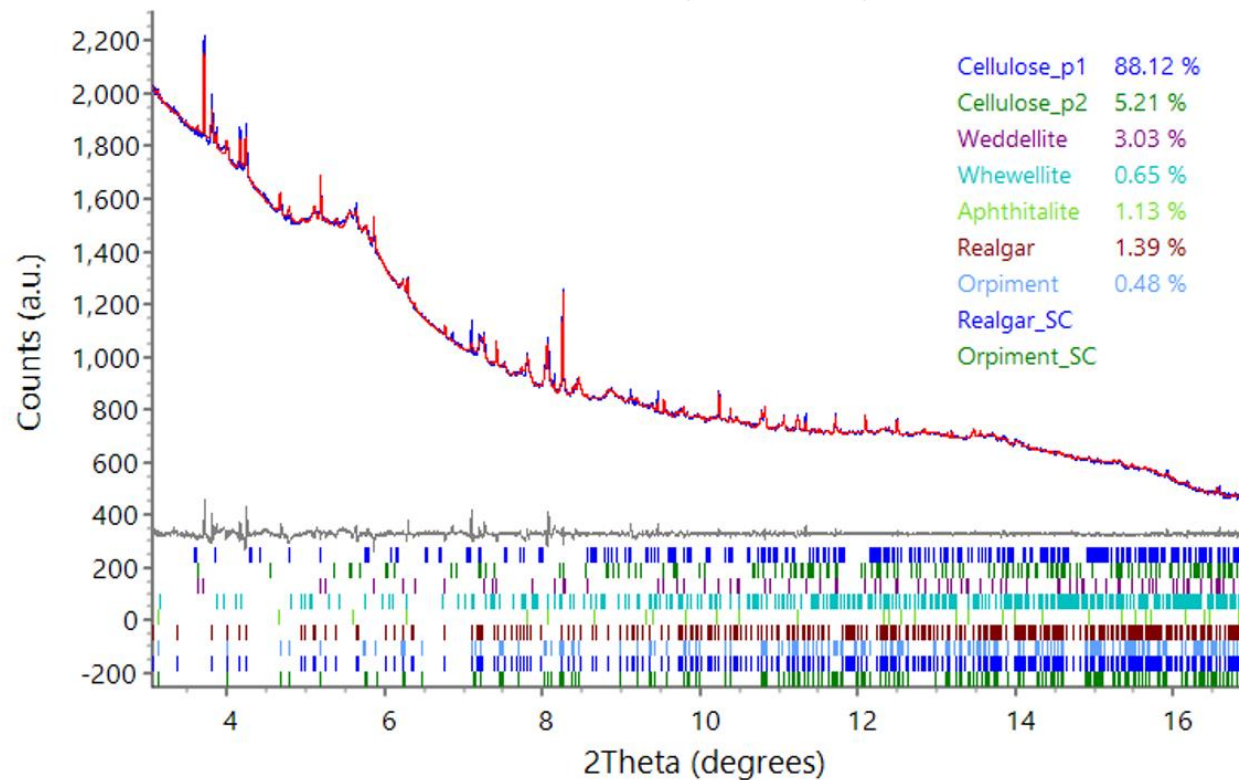

PAP-6 Godhead X-12535 ( $R_{wp}$  0.80%,  $R_{exp}$  0.74%)

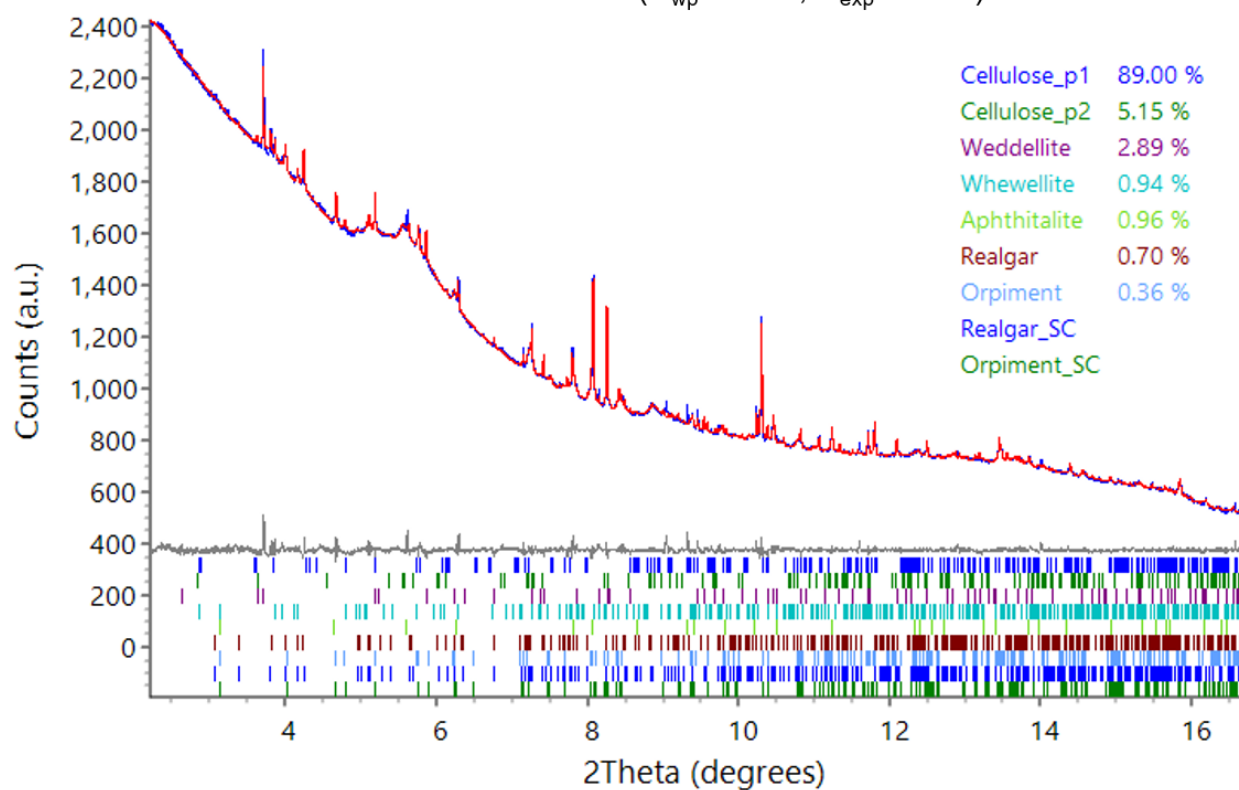

### Refinement results – Deceased arm

PAP-6 Deceased X-17750 Z-28000 ( $R_{wp}$  3.34%,  $R_{exp}$  2.61%)

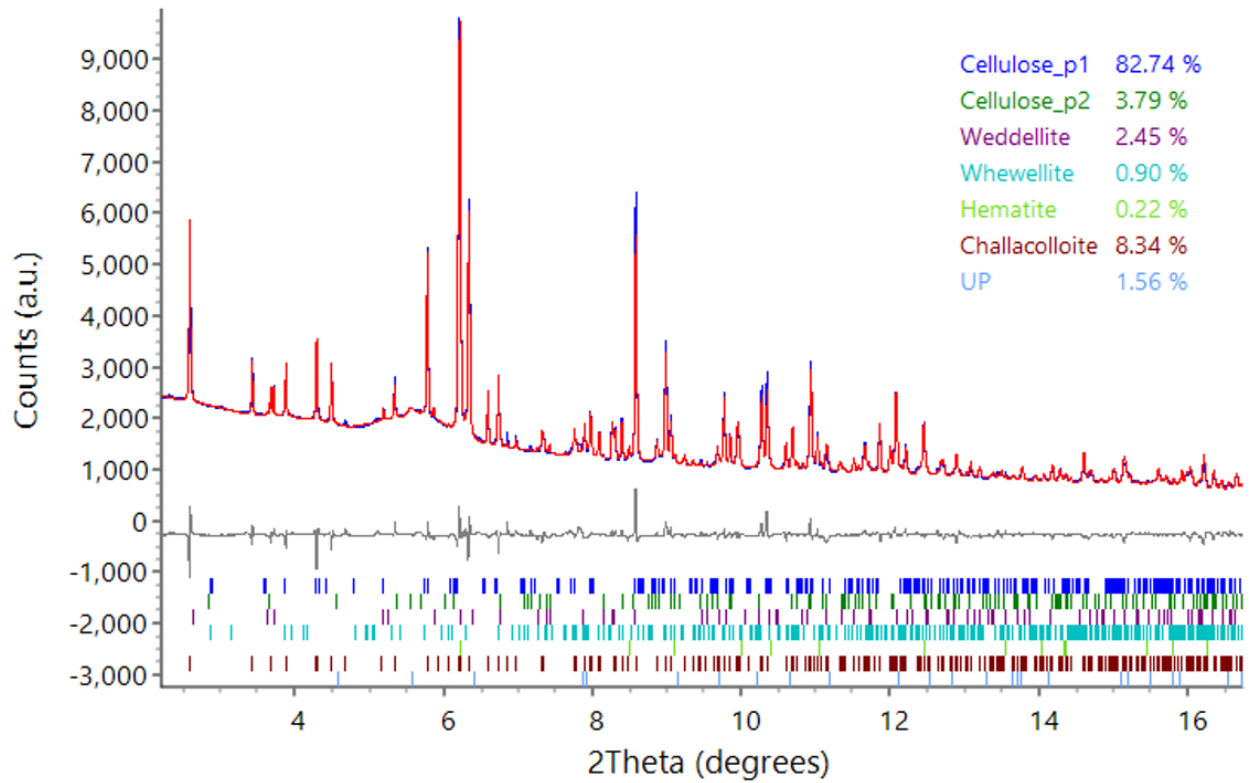

PAP-6 Deceased X-18250 Z-28250 ( $R_{wp}$  4.66%,  $R_{exp}$  2.52%)

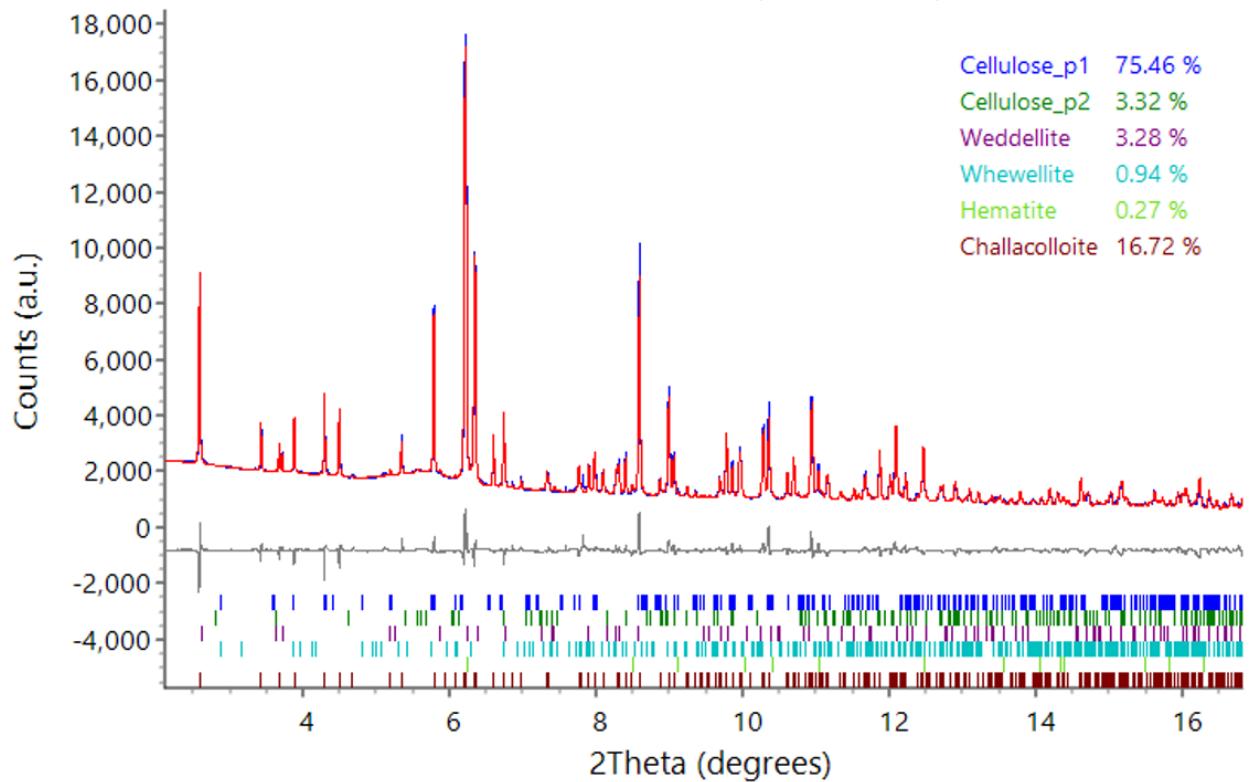

PAP-6 Deceased X-18750 Z-28500 ( $R_{wp}$  2.91%,  $R_{exp}$  2.60%)

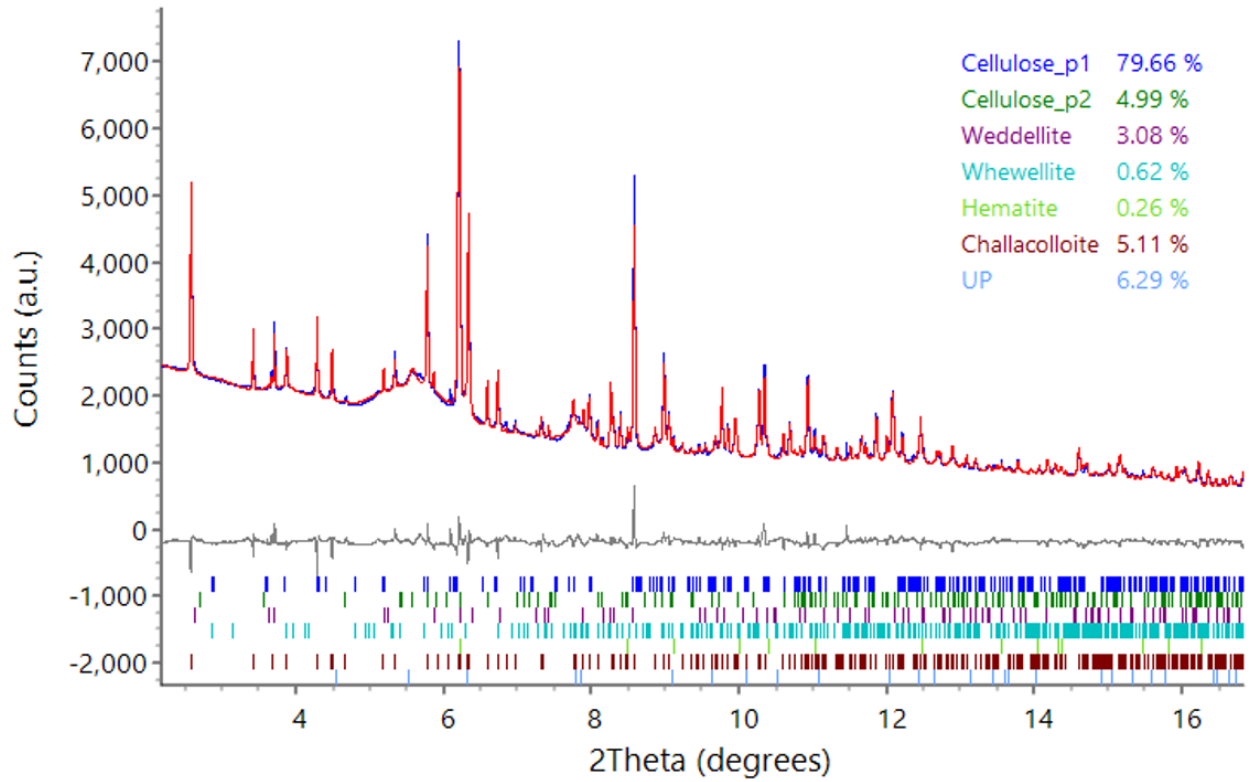

PAP-6 Deceased X-19250 Z-28750 ( $R_{wp}$  1.91%,  $R_{exp}$  1.85%)

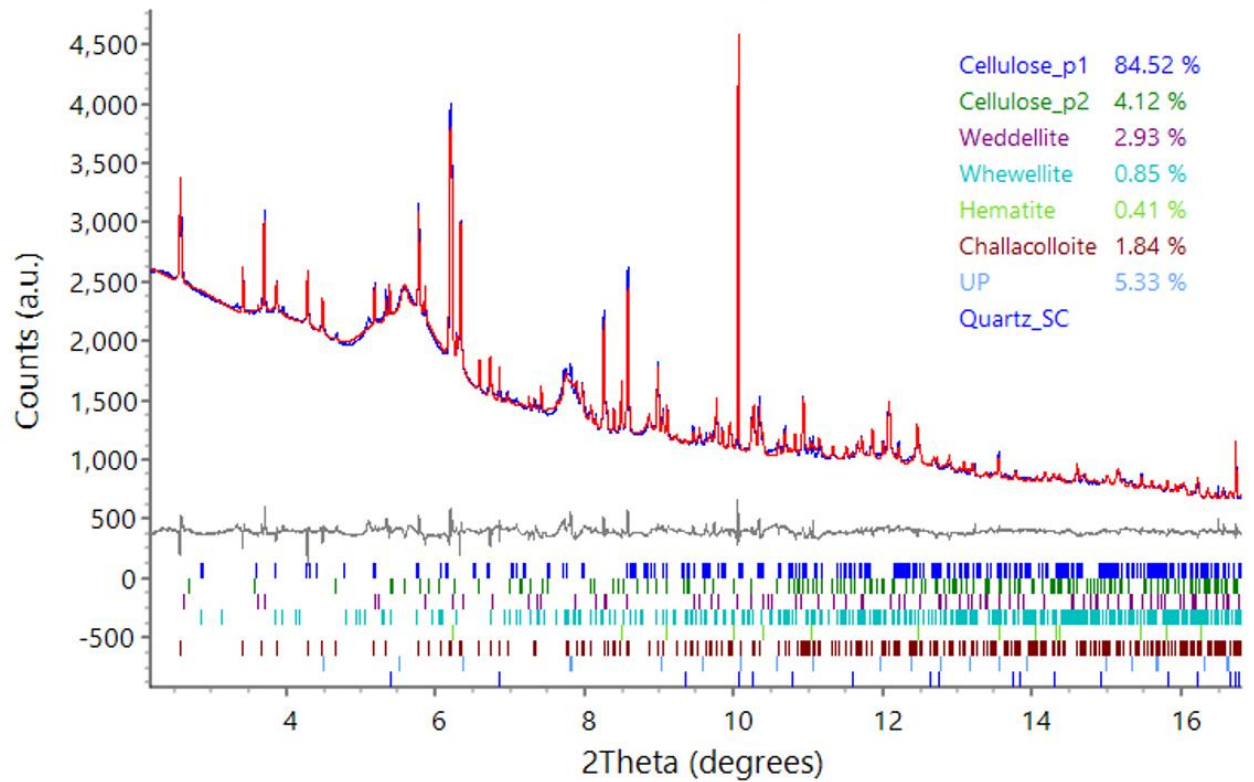

PAP-6 Deceased X-19750 Z-29000 ( $R_{wp}$  3.49%,  $R_{exp}$  2.61%)

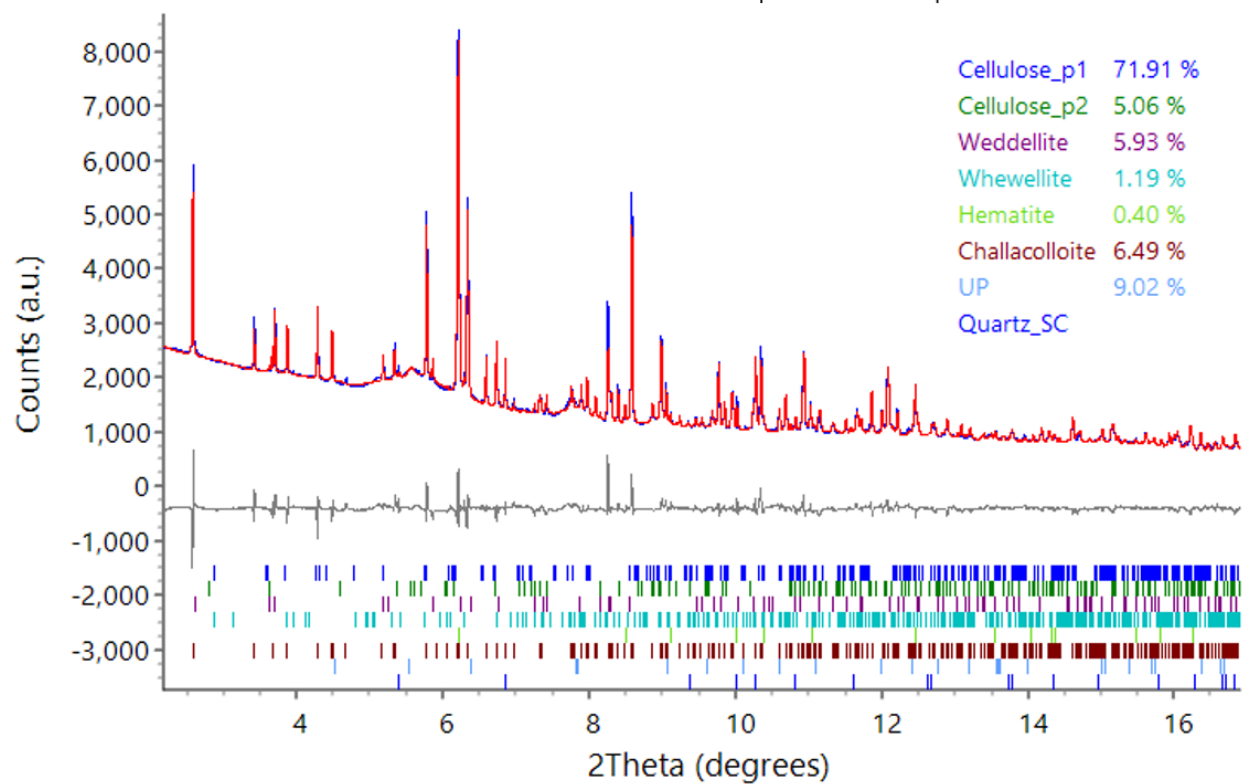



### Refinement results – Column

PAP-12 Column X-22750 ( $R_{wp}$  0.56%,  $R_{exp}$  0.52%)

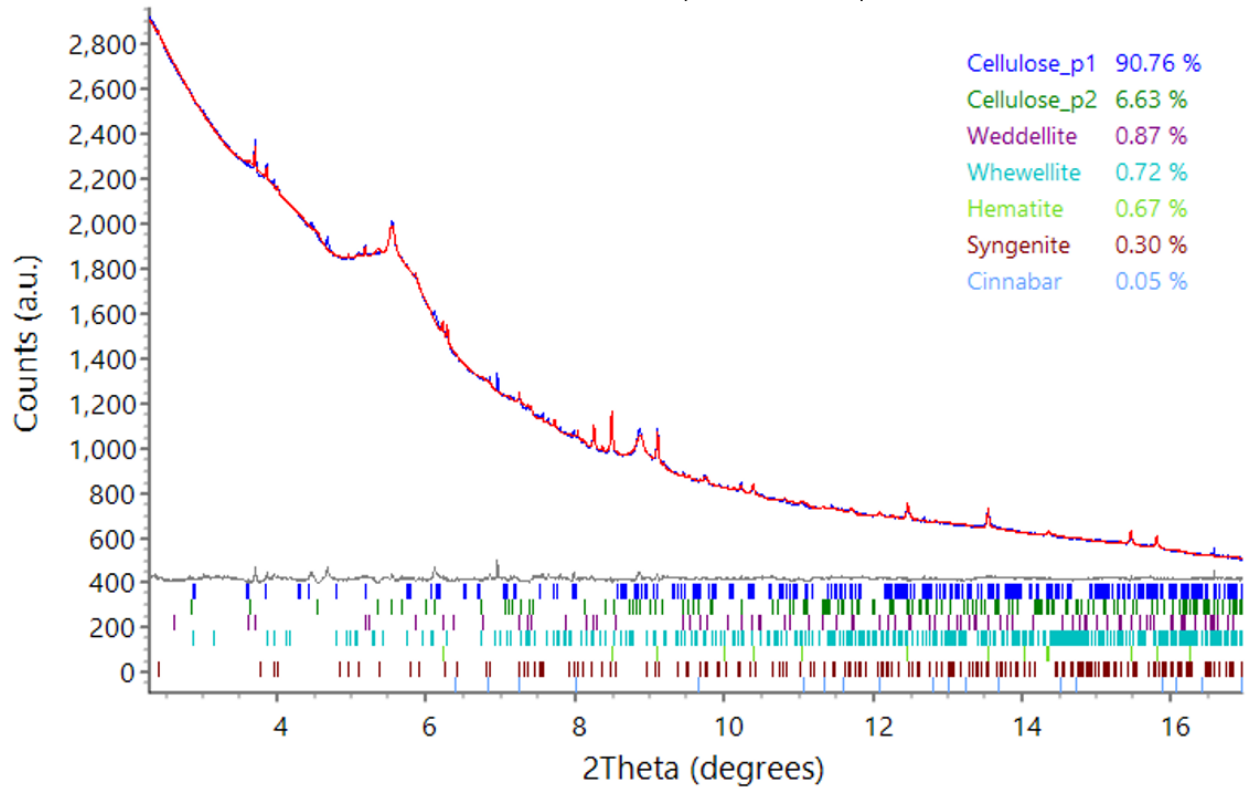

PAP-12 Column X-22500 ( $R_{wp}$  0.55%,  $R_{exp}$  0.53%)

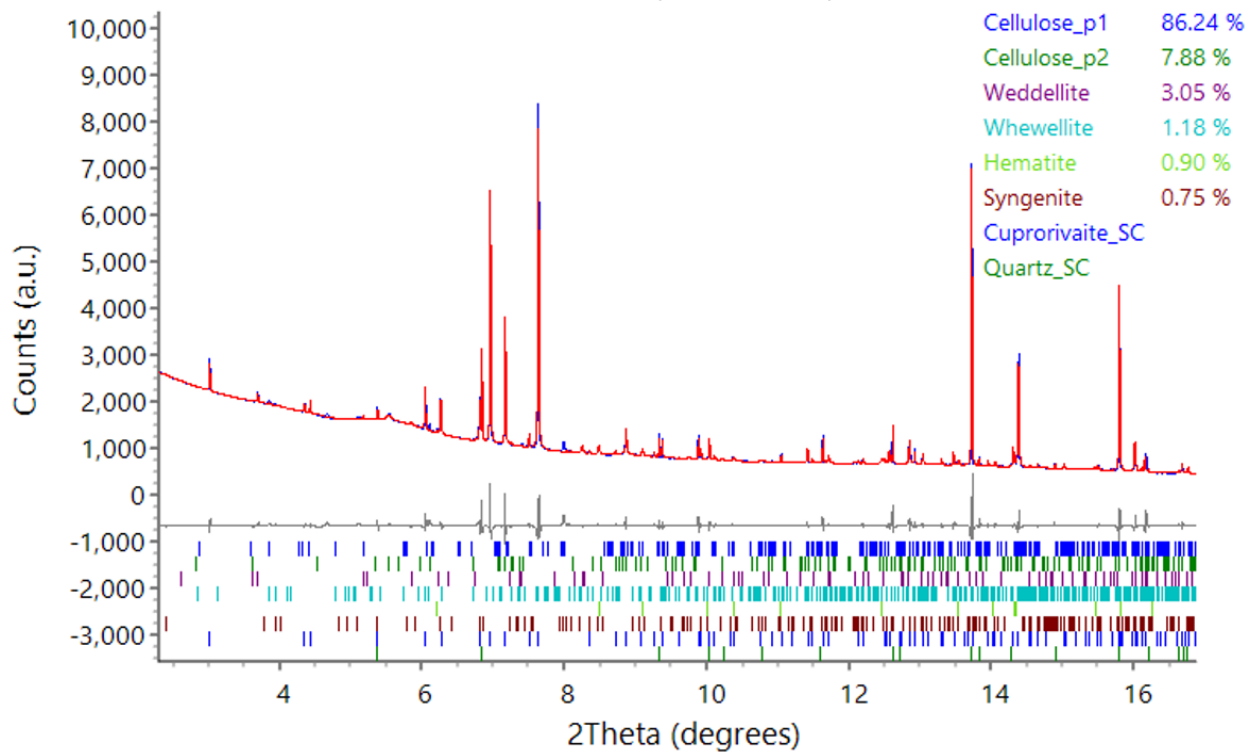

PAP-12 Column X-22250 ( $R_{wp}$  4.36%,  $R_{exp}$  0.49%)

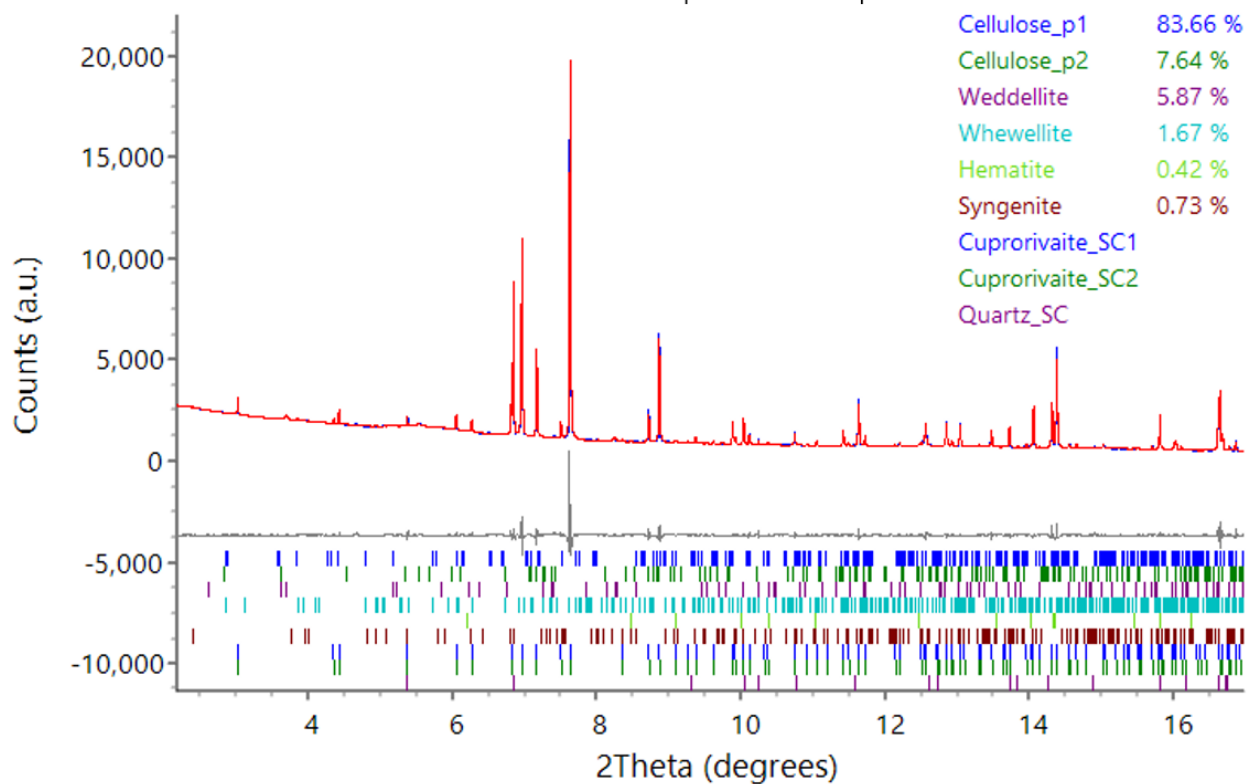

PAP-12 Column X-22000 ( $R_{wp}$  3.34%,  $R_{exp}$  0.47%)

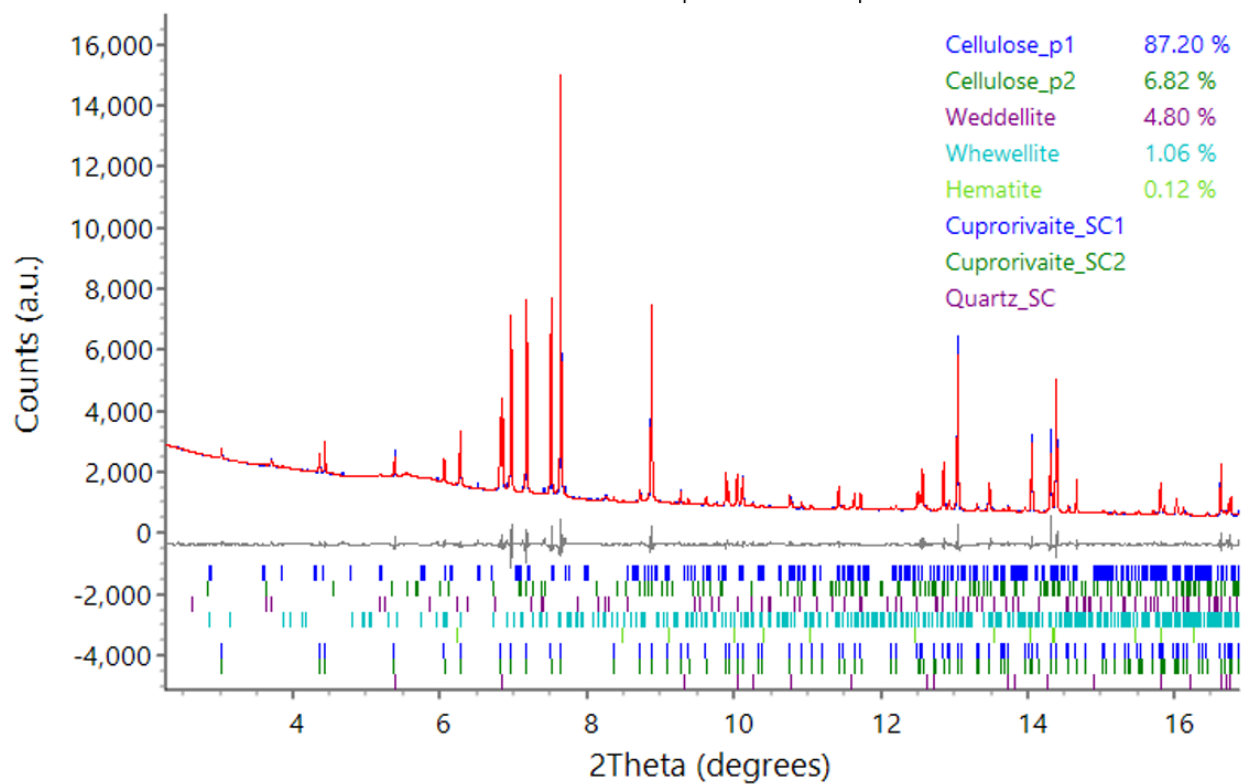

PAP-12 Column X-21750 ( $R_{wp}$  3.66%,  $R_{exp}$  0.49%)

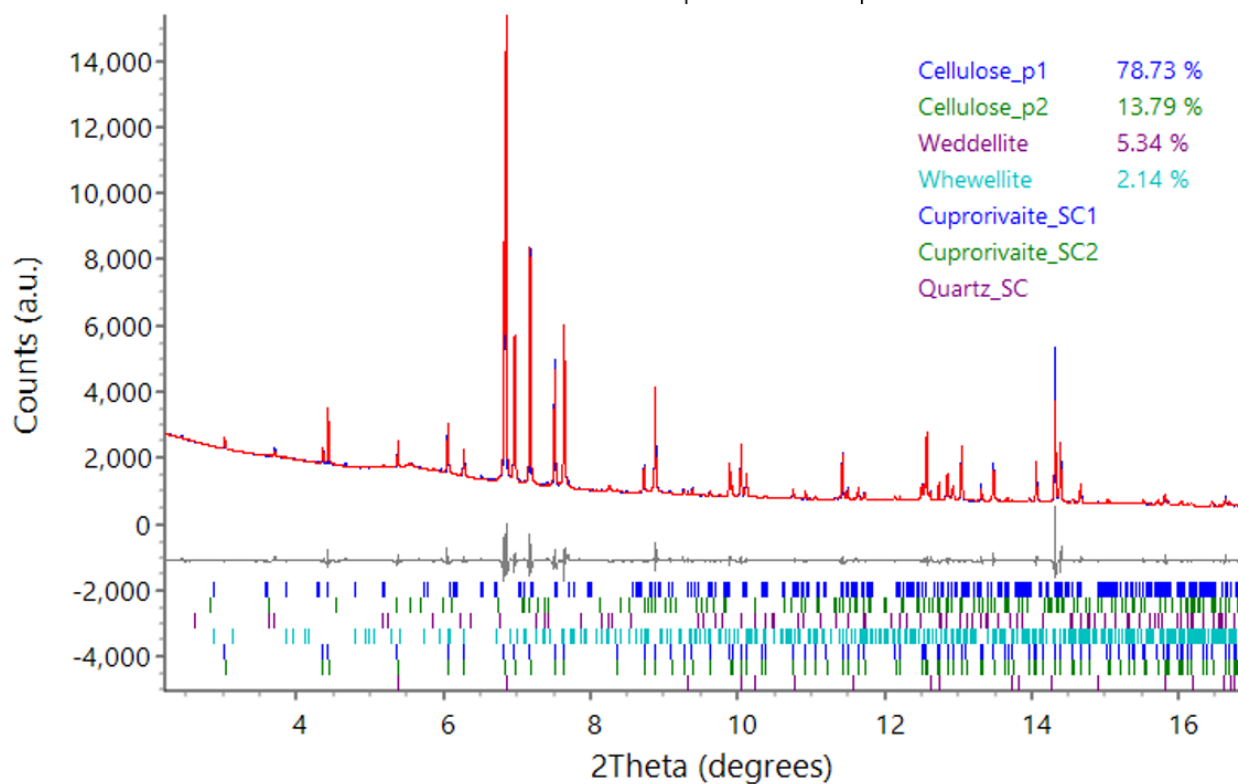

PAP-12 Column X-21500 ( $R_{wp}$  4.53%,  $R_{exp}$  0.43%)

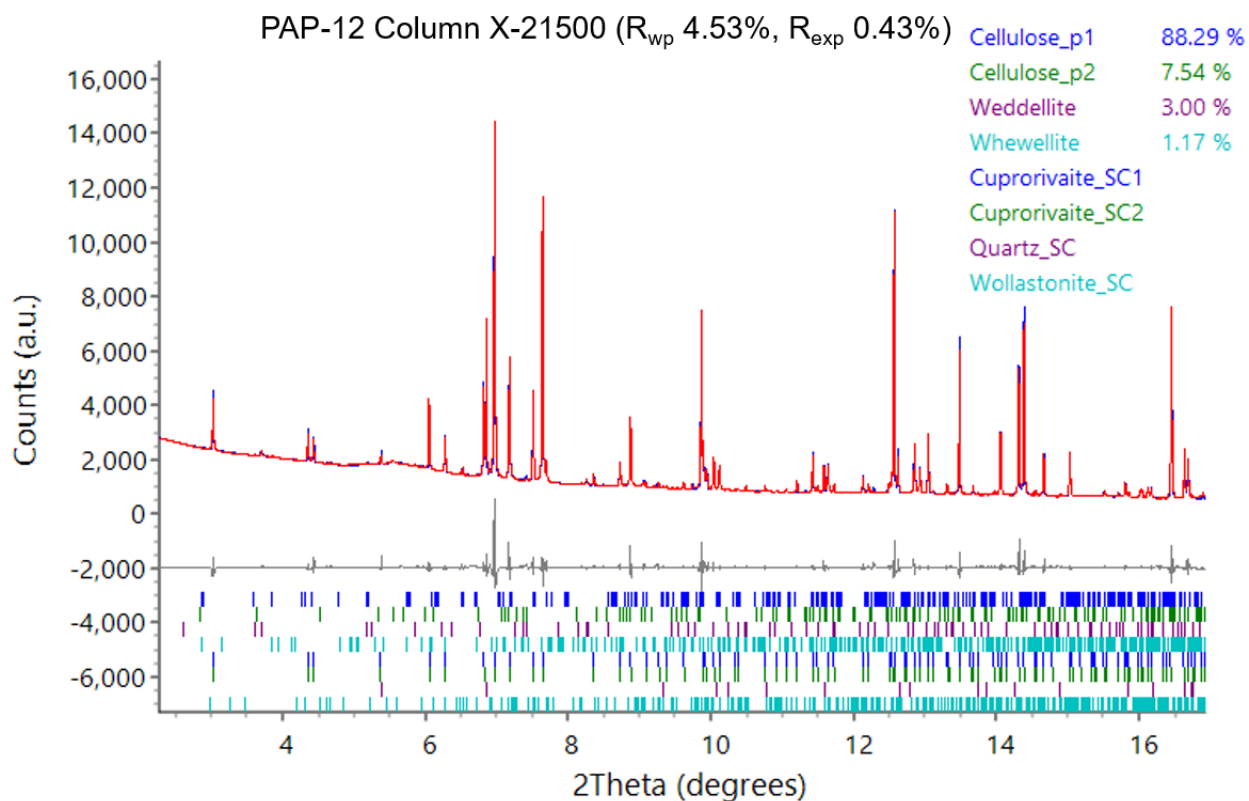

PAP-12 Column X-21250 ( $R_{wp}$  3.83%,  $R_{exp}$  0.47%)

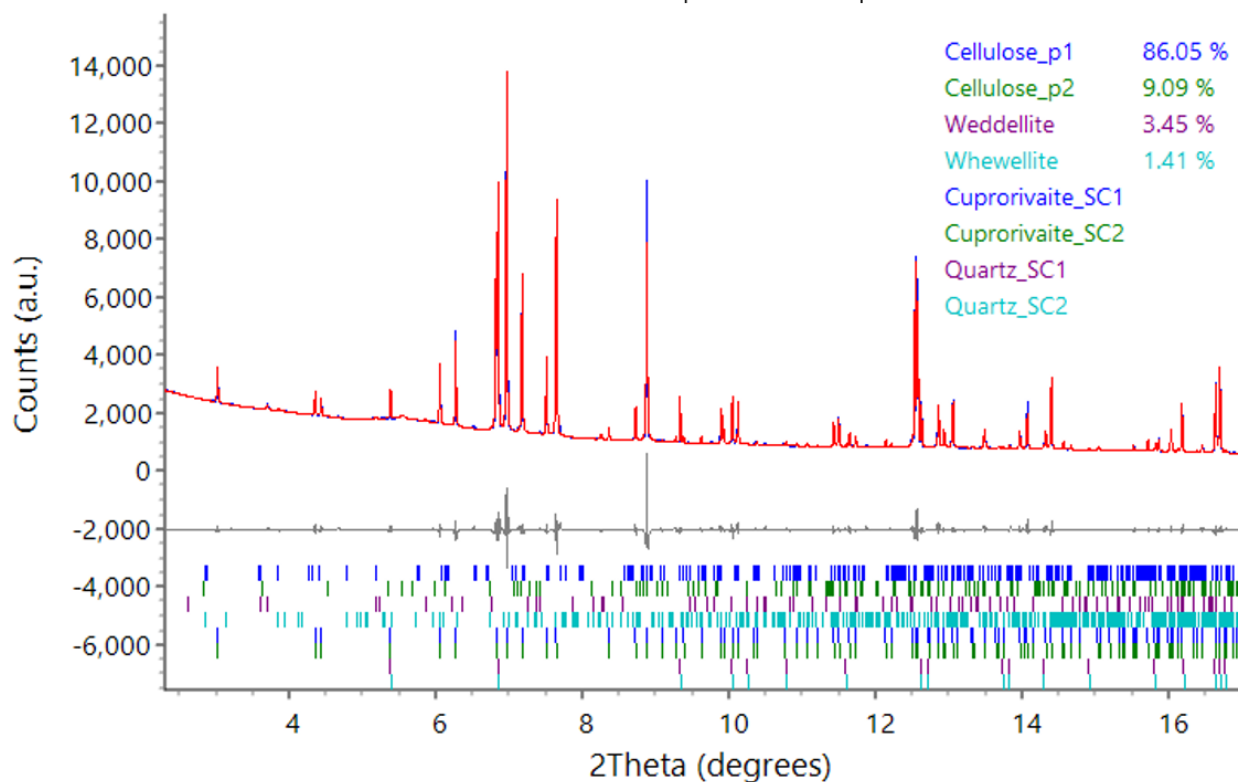

PAP-12 Column X-21000 ( $R_{wp}$  3.17%,  $R_{exp}$  0.50%)

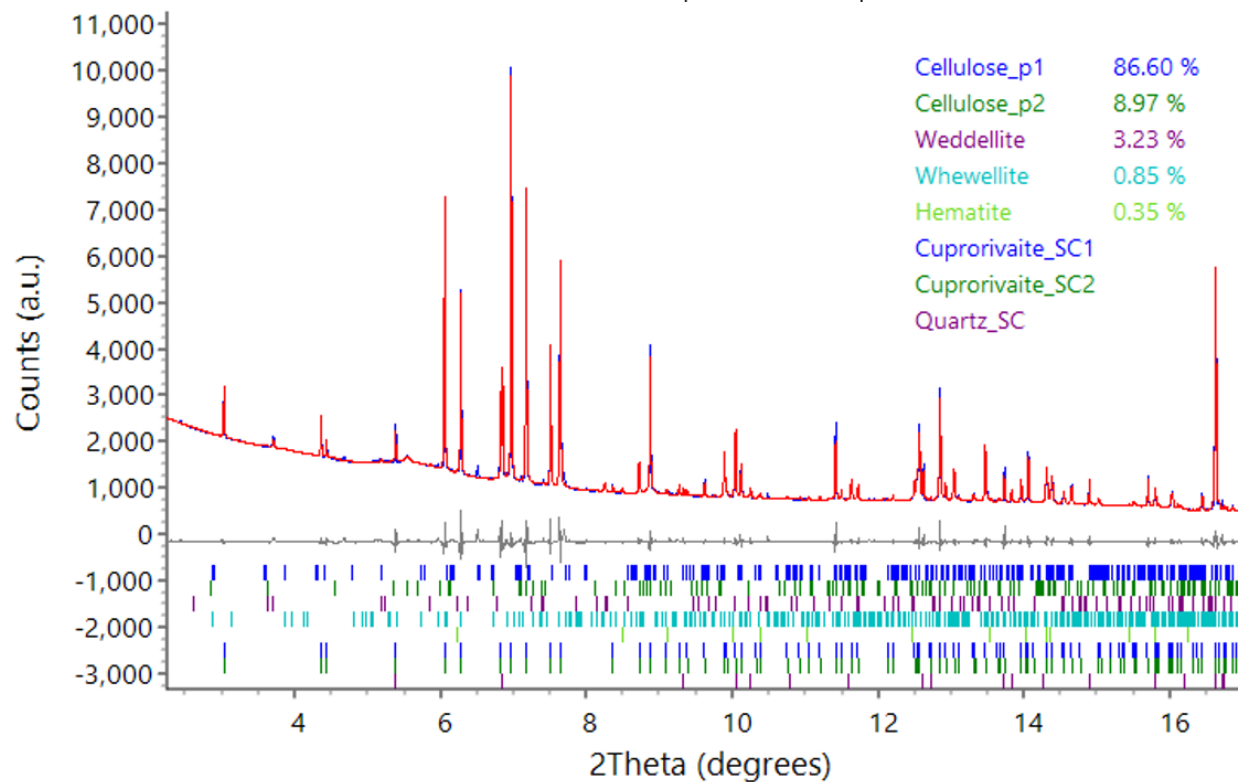

PAP-12 Column X-20750 ( $R_{wp}$  2.01%,  $R_{exp}$  0.50%)

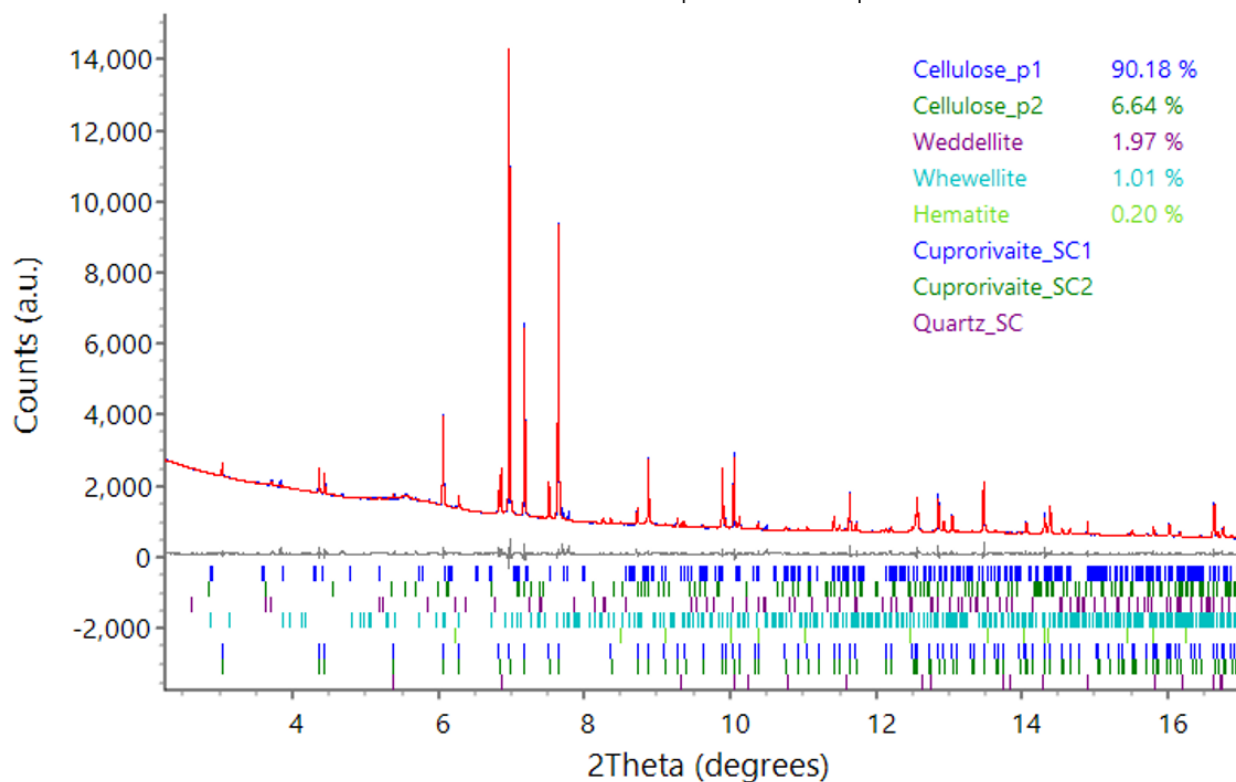

PAP-12 Column X-20500 ( $R_{wp}$  0.45%,  $R_{exp}$  0.42%)

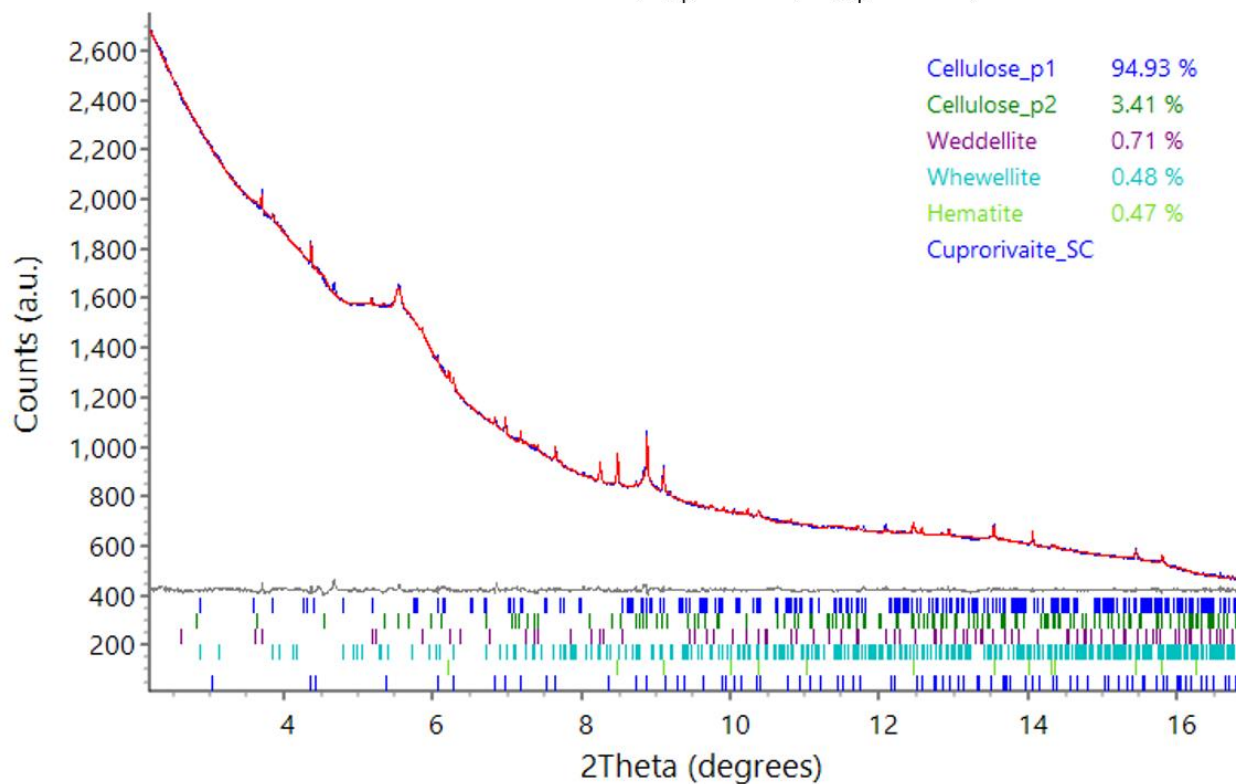

PAP-12 Column X-20250 ( $R_{wp}$  0.76%,  $R_{exp}$  0.56%)

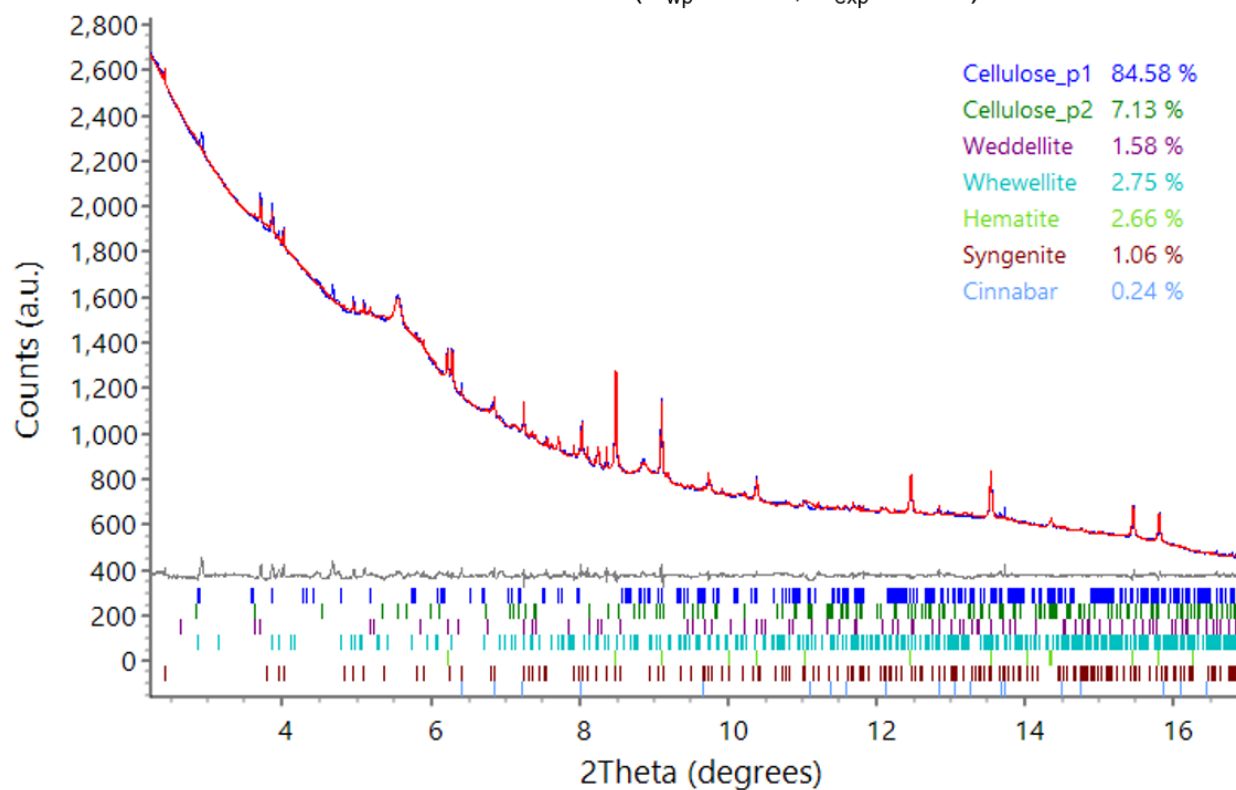

PAP-12 Column X-20000 ( $R_{wp}$  0.71%,  $R_{exp}$  0.54%)

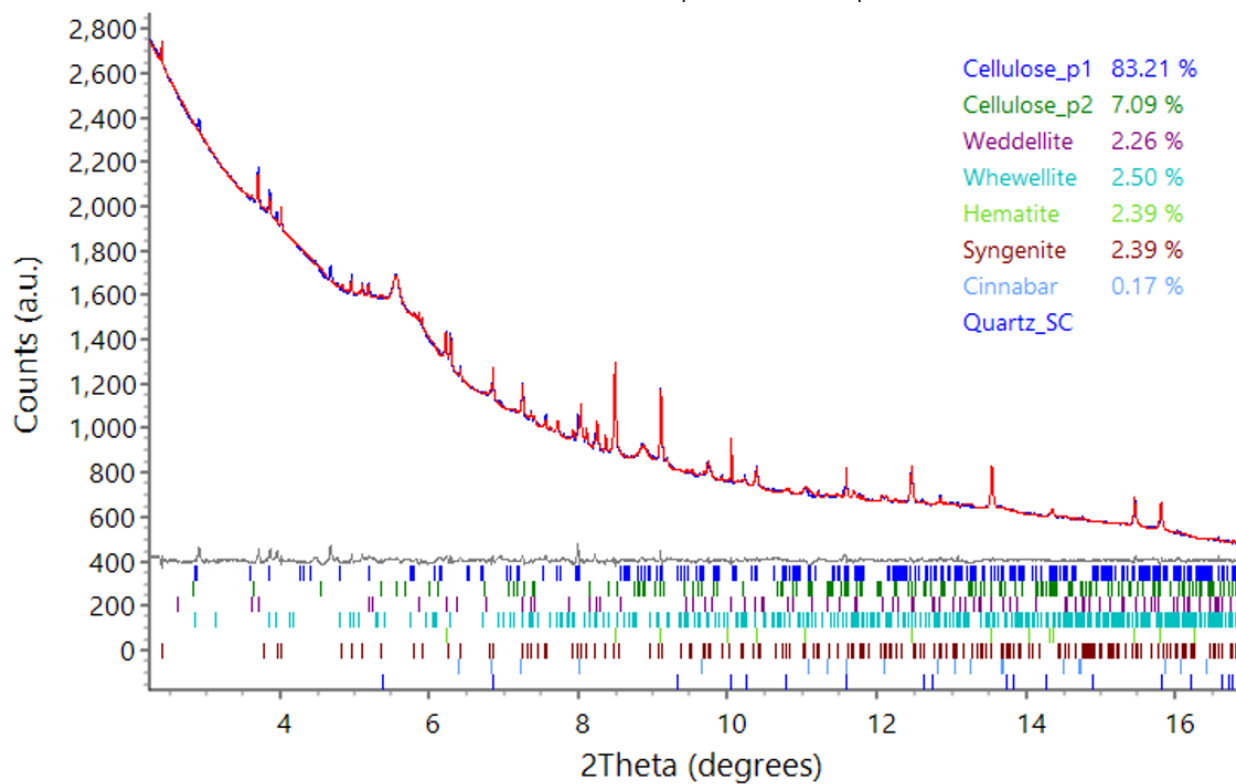

PAP-12 Column X-19750 ( $R_{wp}$  1.01%,  $R_{exp}$  0.56%)

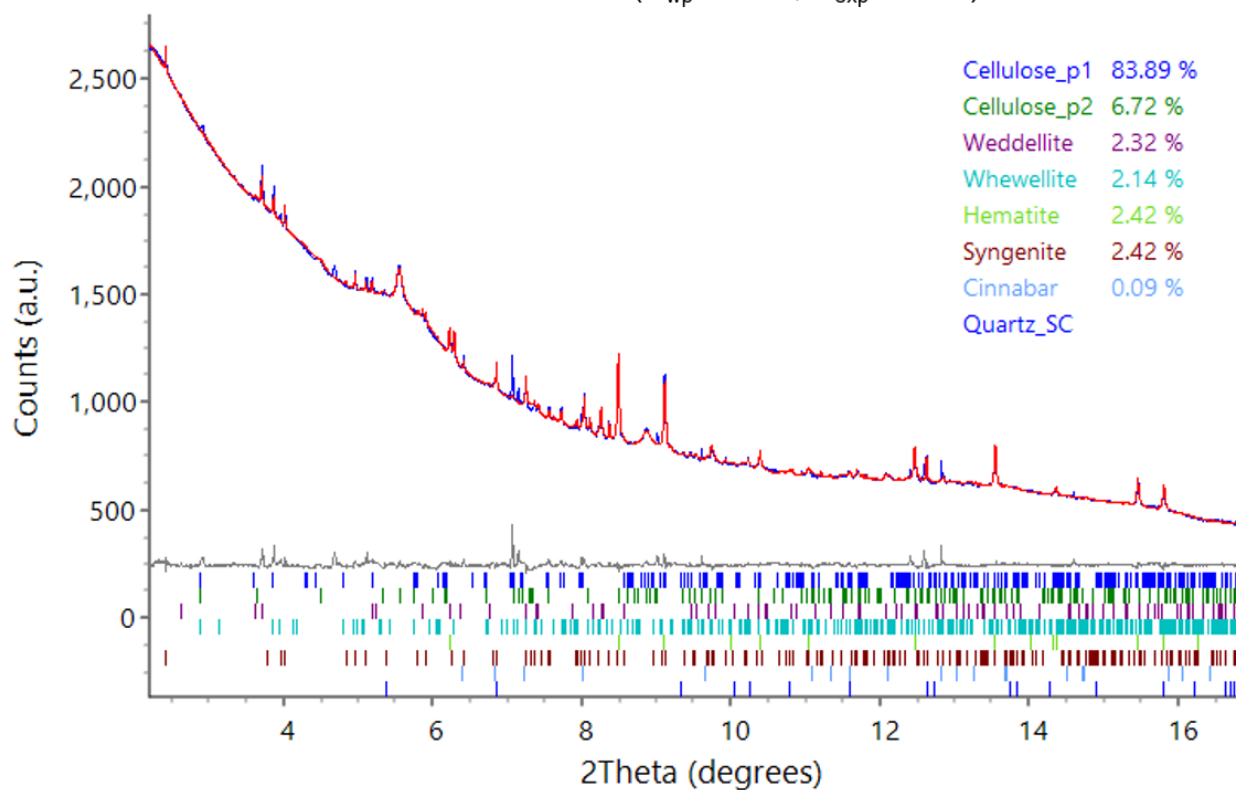

PAP-12 Column X-19500 ( $R_{wp}$  0.70%,  $R_{exp}$  0.56%)

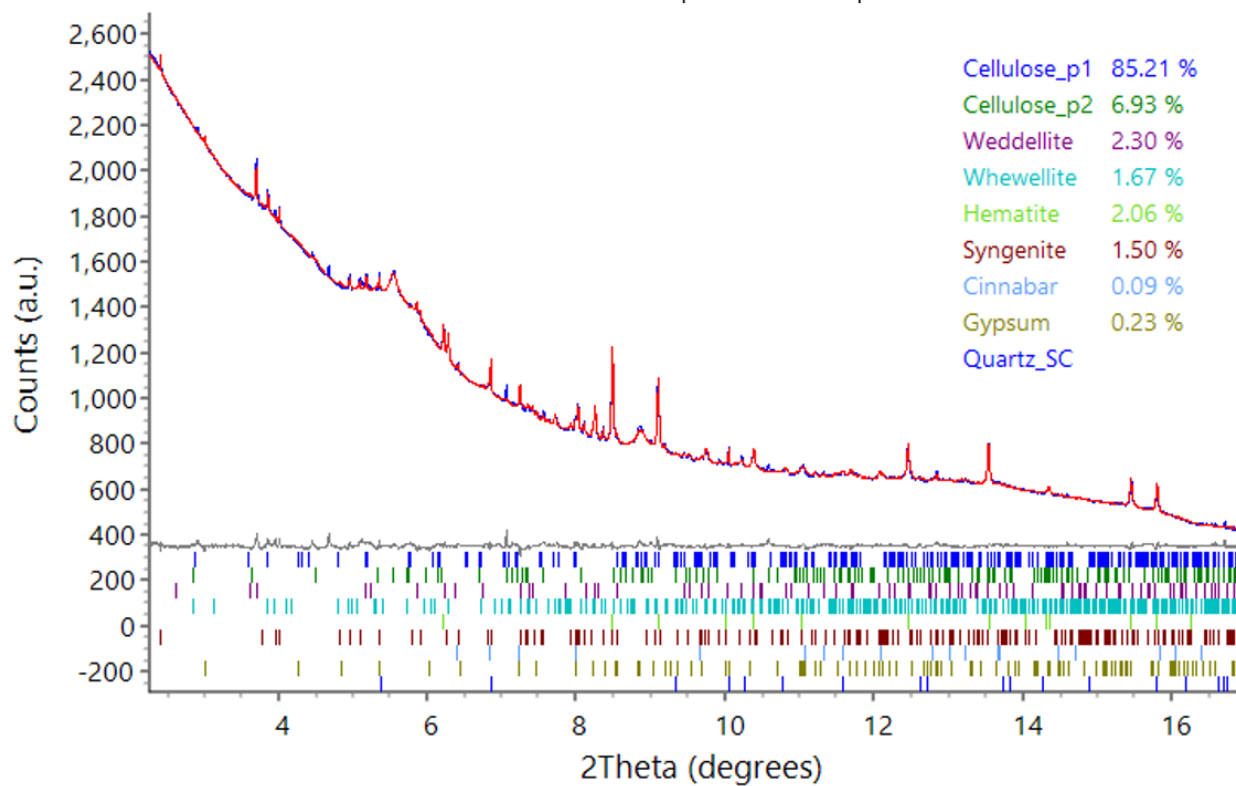

PAP-12 Column X-19250 ( $R_{wp}$  0.78%,  $R_{exp}$  0.55%)

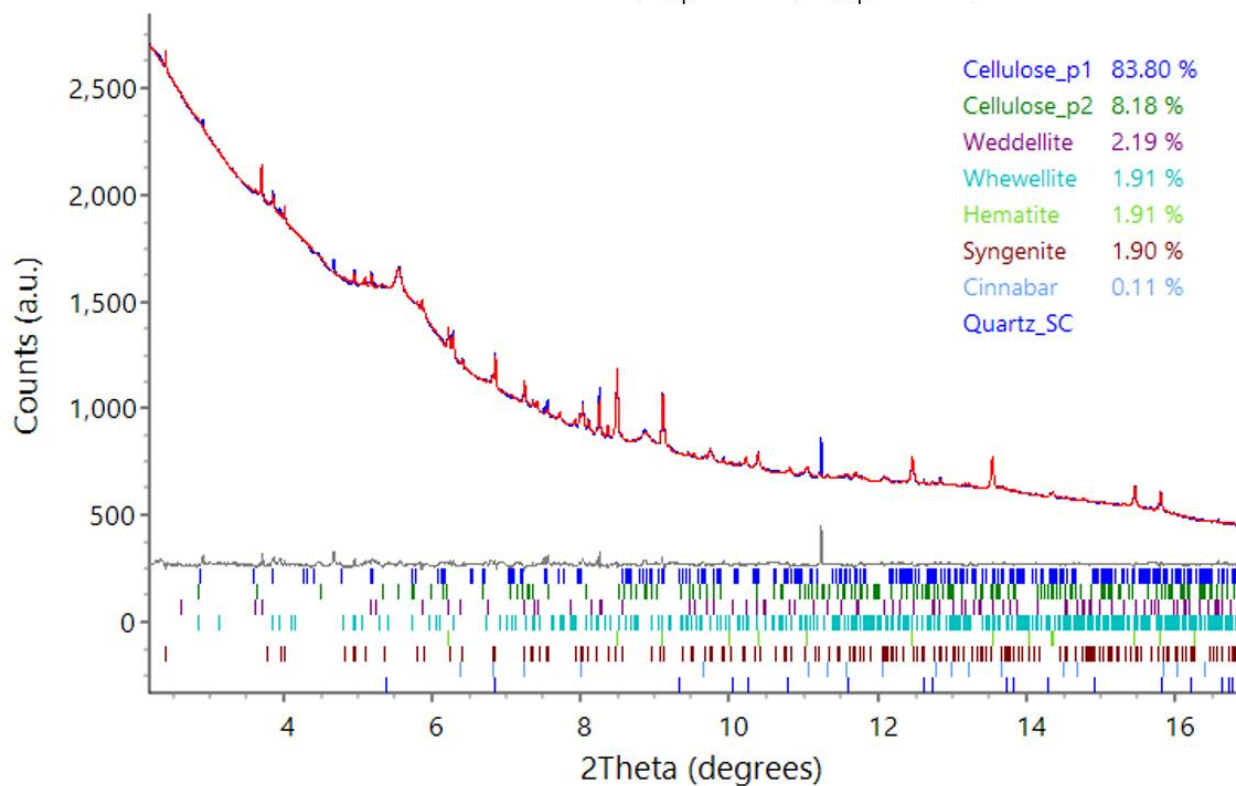

PAP-12 Column X-19000 ( $R_{wp}$  0.63%,  $R_{exp}$  0.56%)

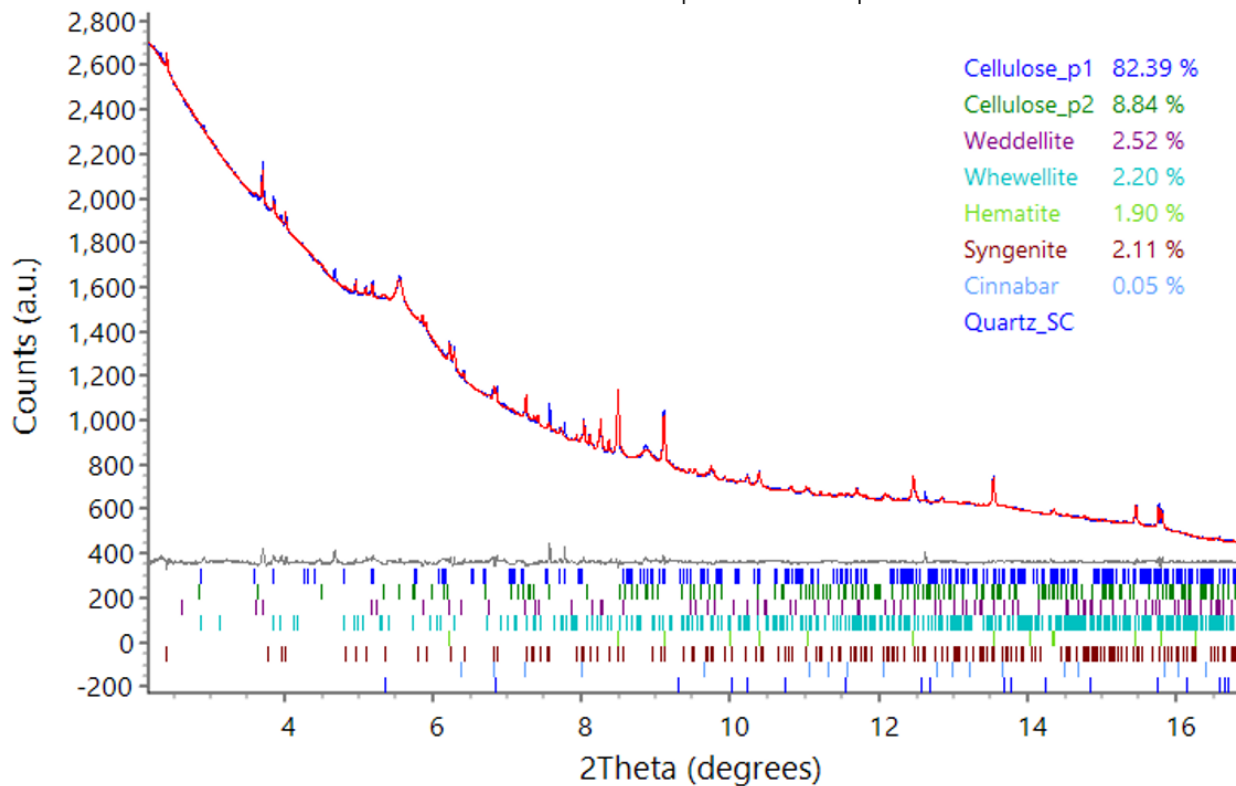



PAP-12 Column X-18750 ( $R_{wp}$  0.56%,  $R_{exp}$  0.49%)

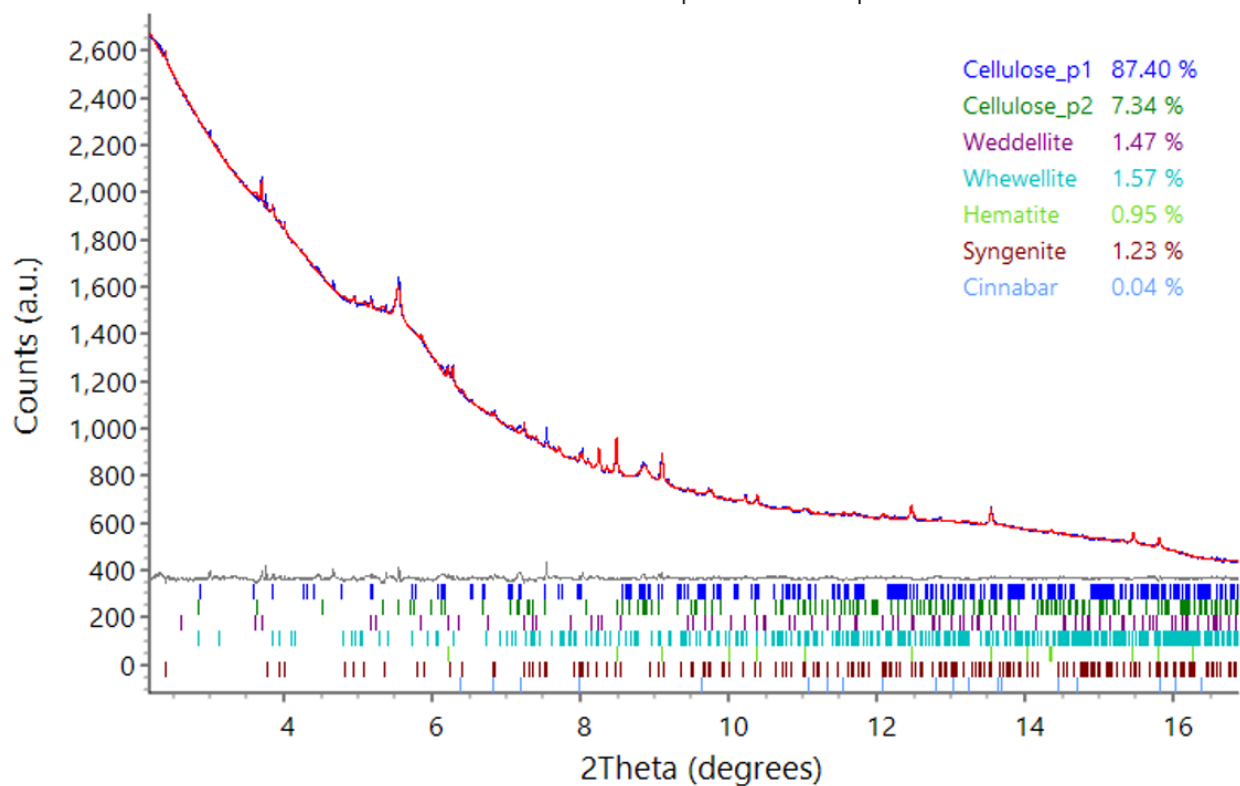

PAP-12 Column X-18250 ( $R_{wp}$  0.51%,  $R_{exp}$  0.47%)

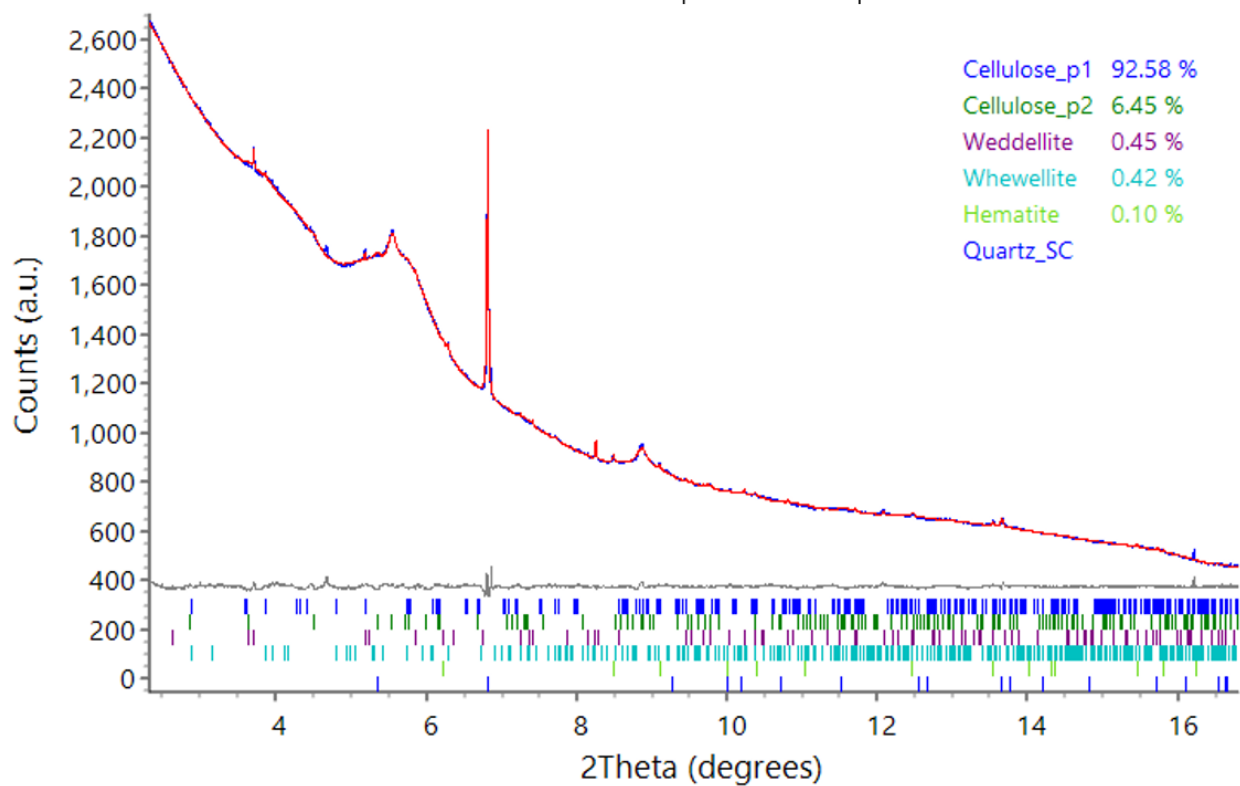

PAP-12 Column X-17750 ( $R_{wp}$  0.43%,  $R_{exp}$  0.42%)

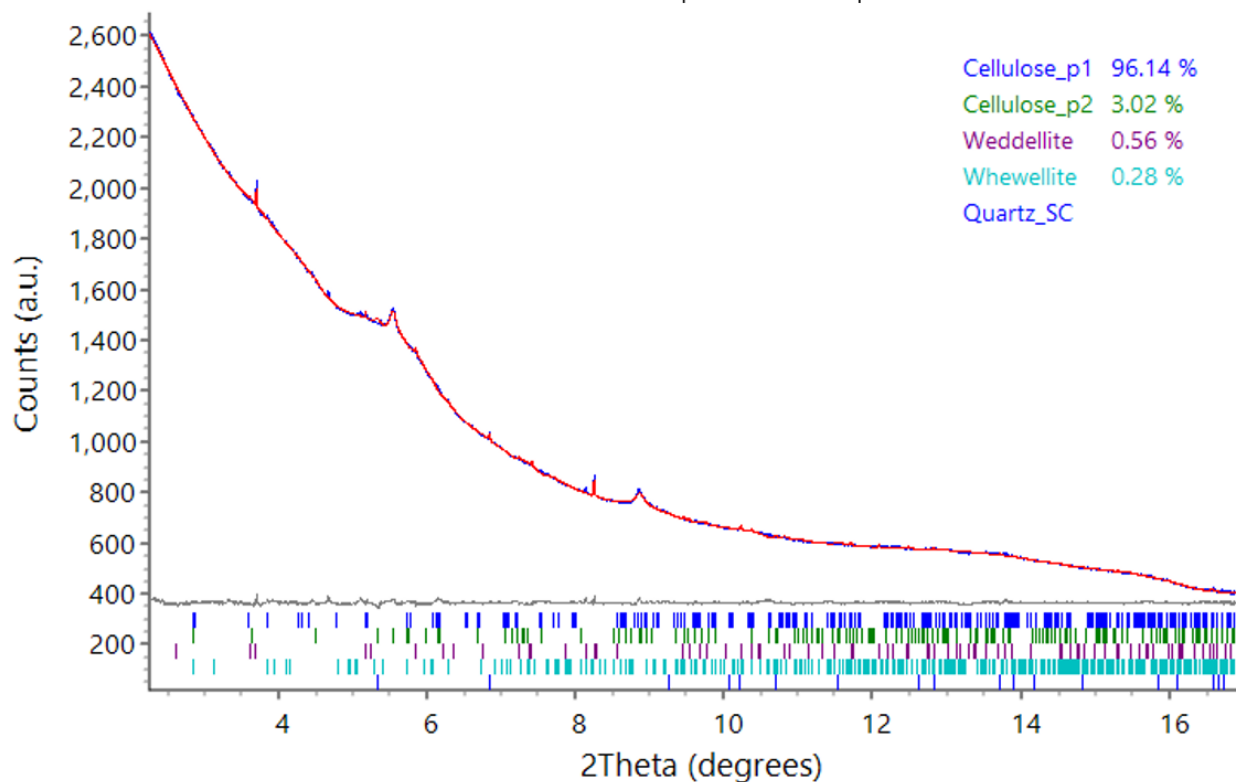

PAP-12 Column X-17500 ( $R_{wp}$  1.30%,  $R_{exp}$  0.55%)

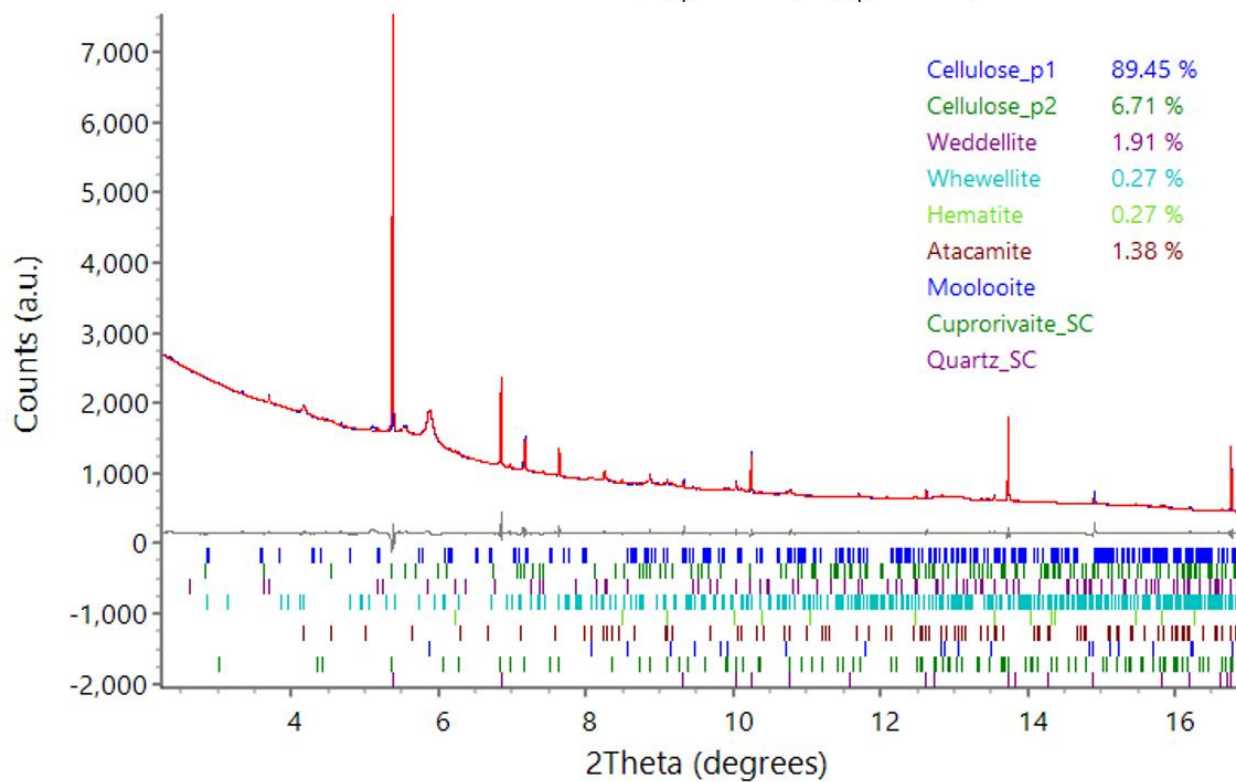

PAP-12 Column X-17250 ( $R_{wp}$  1.82%,  $R_{exp}$  0.50%)

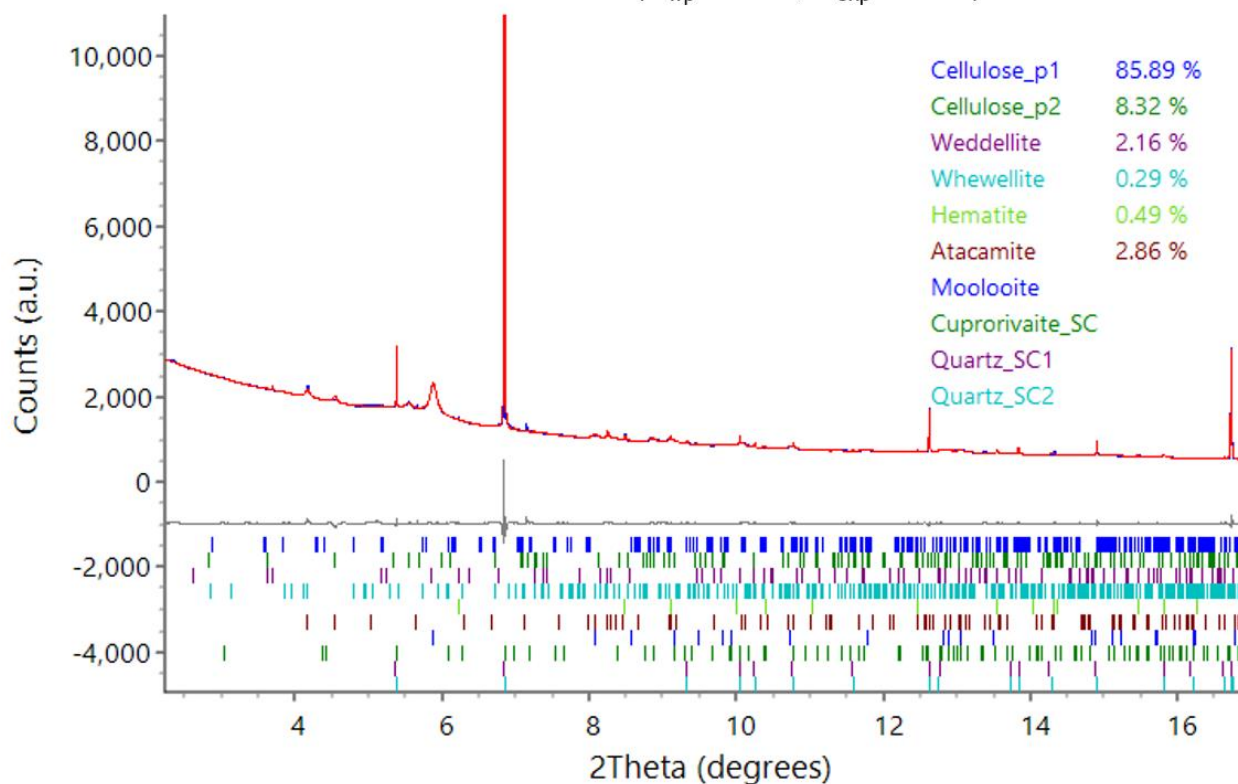

PAP-12 Column X-17000 ( $R_{wp}$  0.82%,  $R_{exp}$  0.55%)

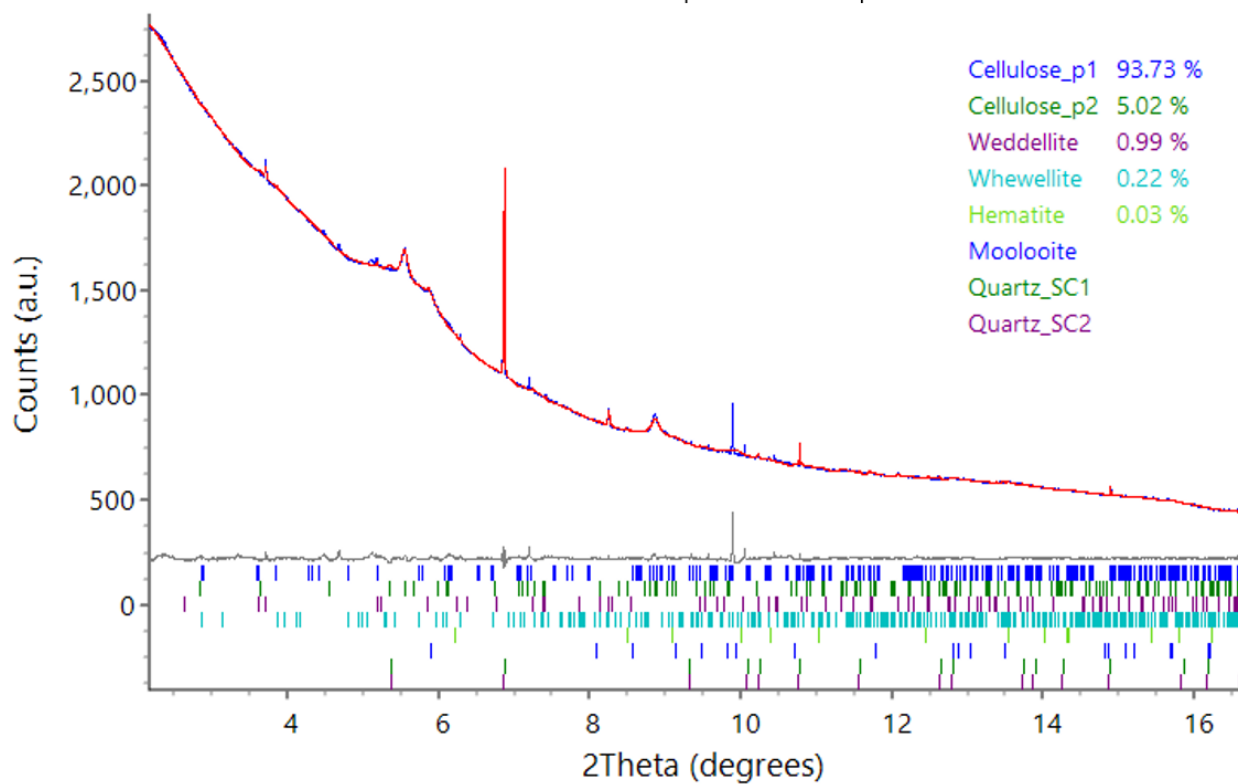

PAP-12 Column X-16750 ( $R_{wp}$  0.41%,  $R_{exp}$  0.40%)

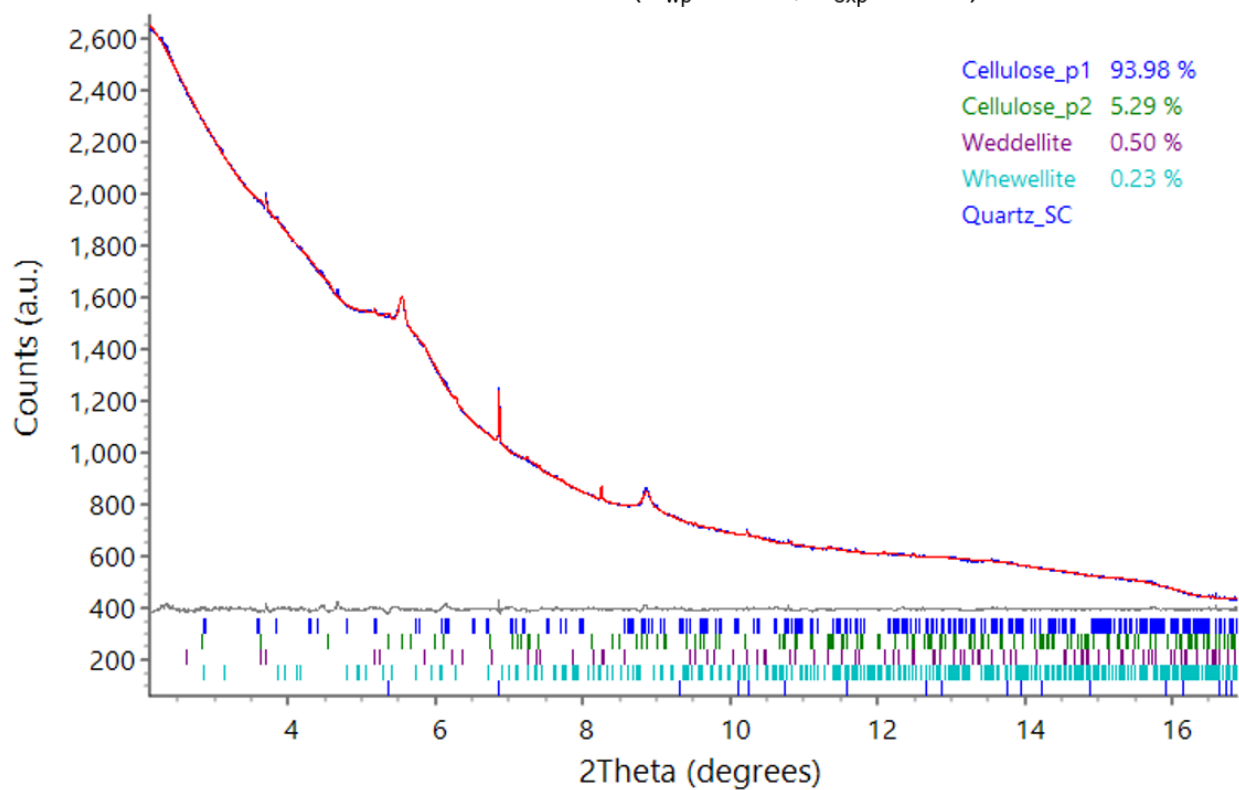

PAP-12 Column X-16500 ( $R_{wp}$  0.39%,  $R_{exp}$  0.38%)

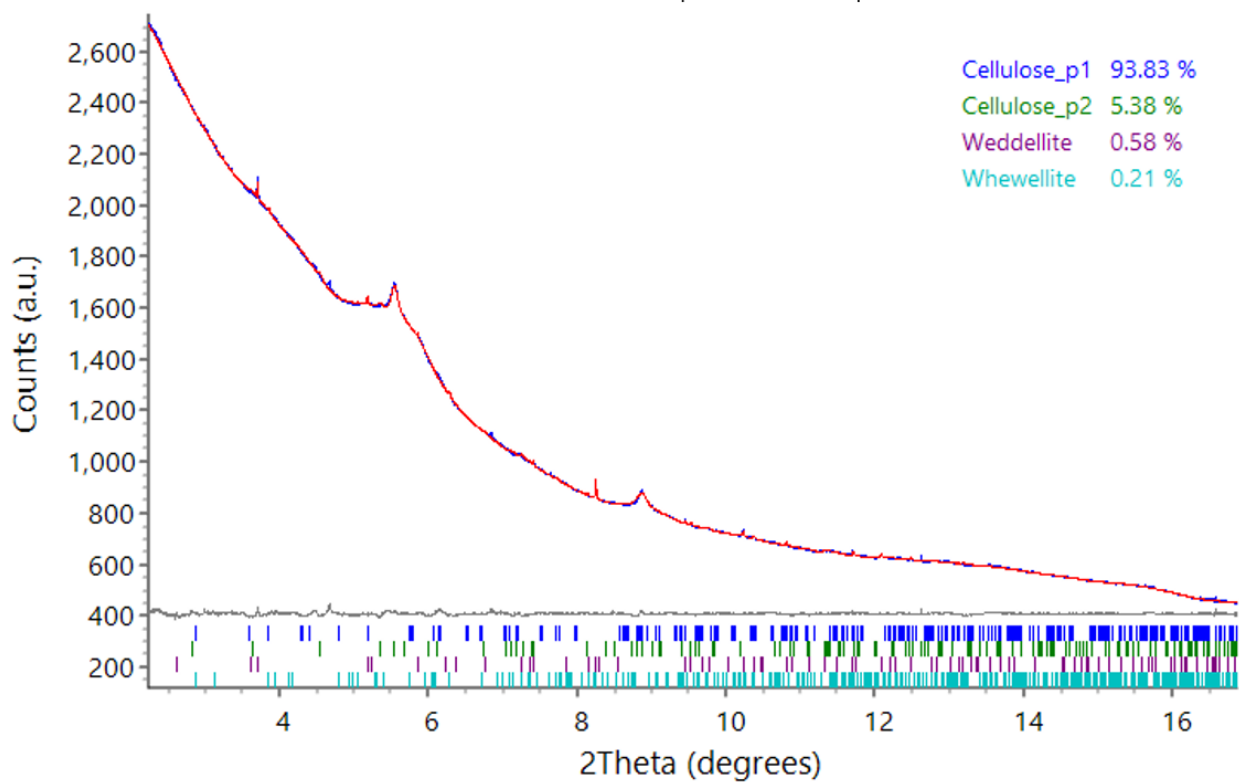

PAP-12 Column X-16250 ( $R_{wp}$  0.54%,  $R_{exp}$  0.40%)

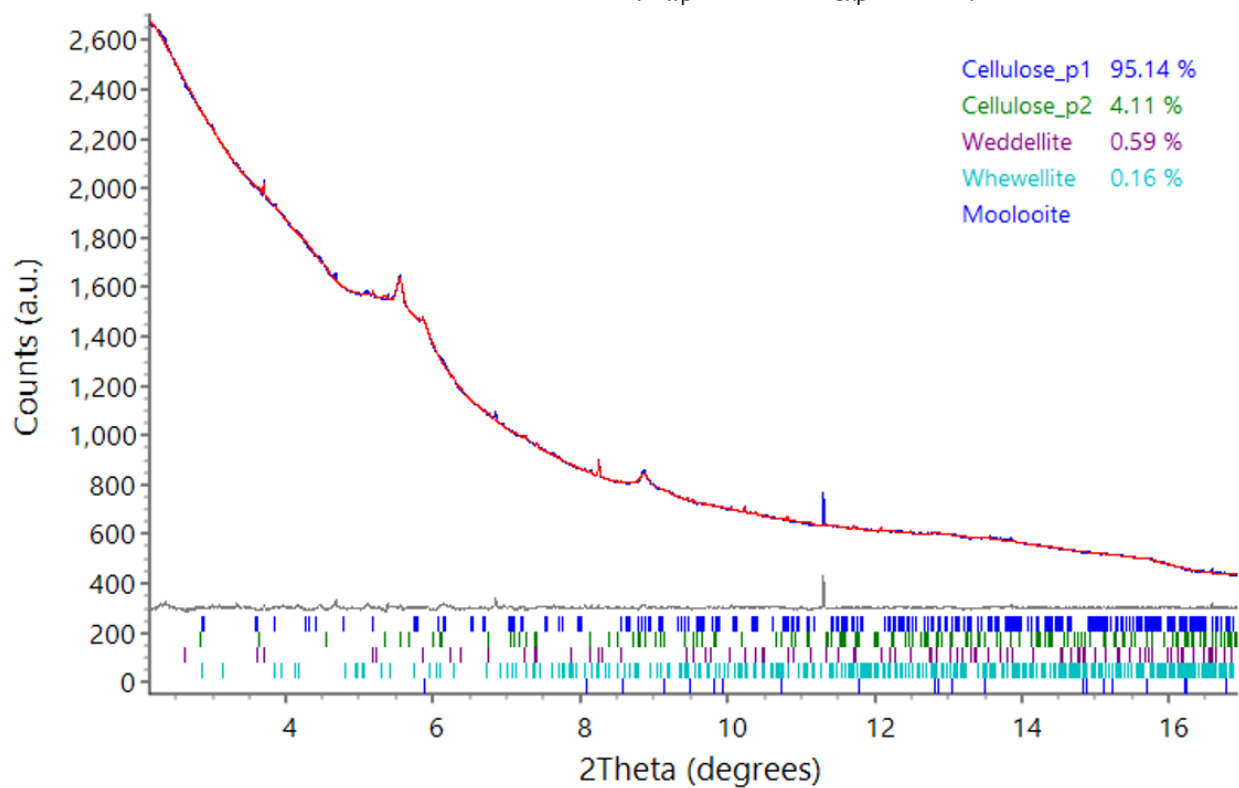

PAP-12 Column X-16000 ( $R_{wp}$  0.77%,  $R_{exp}$  0.53%)

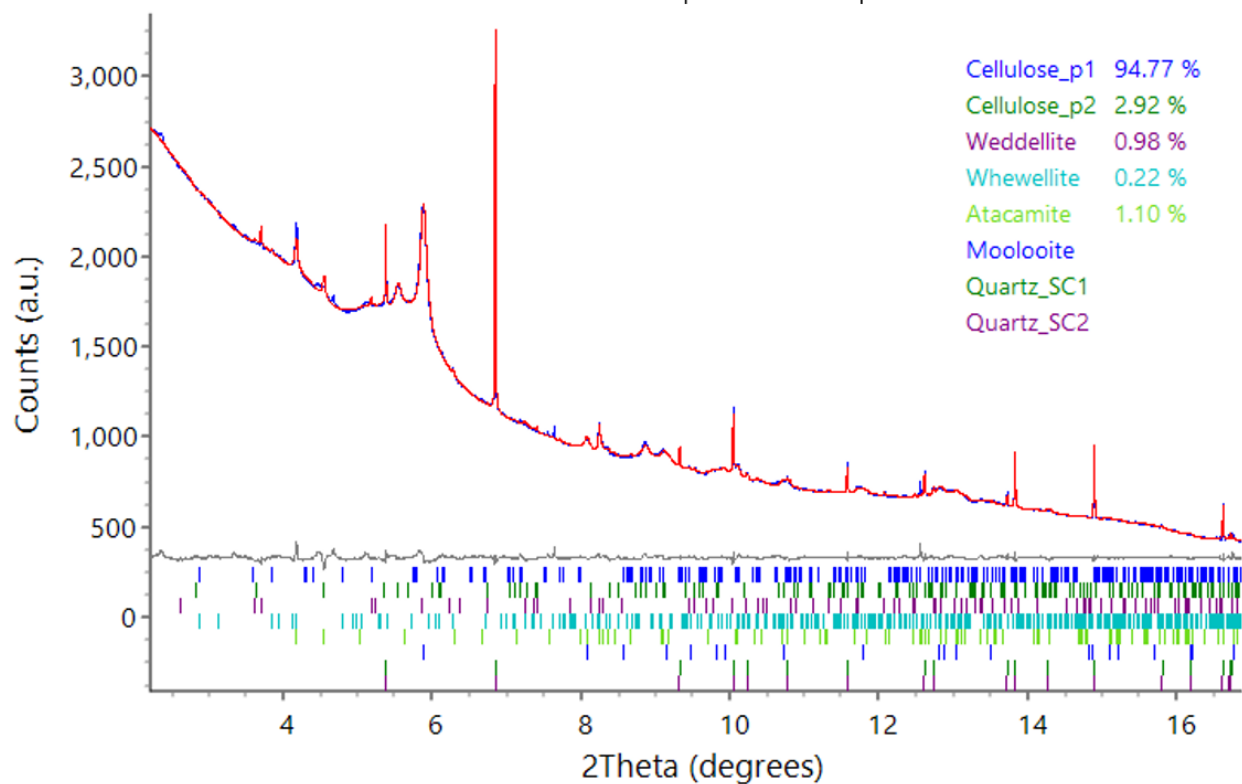

### Refinement results – Cobra

PAP-12 Cobra X-11250 ( $R_{wp}$  0.68%,  $R_{exp}$  0.62%)

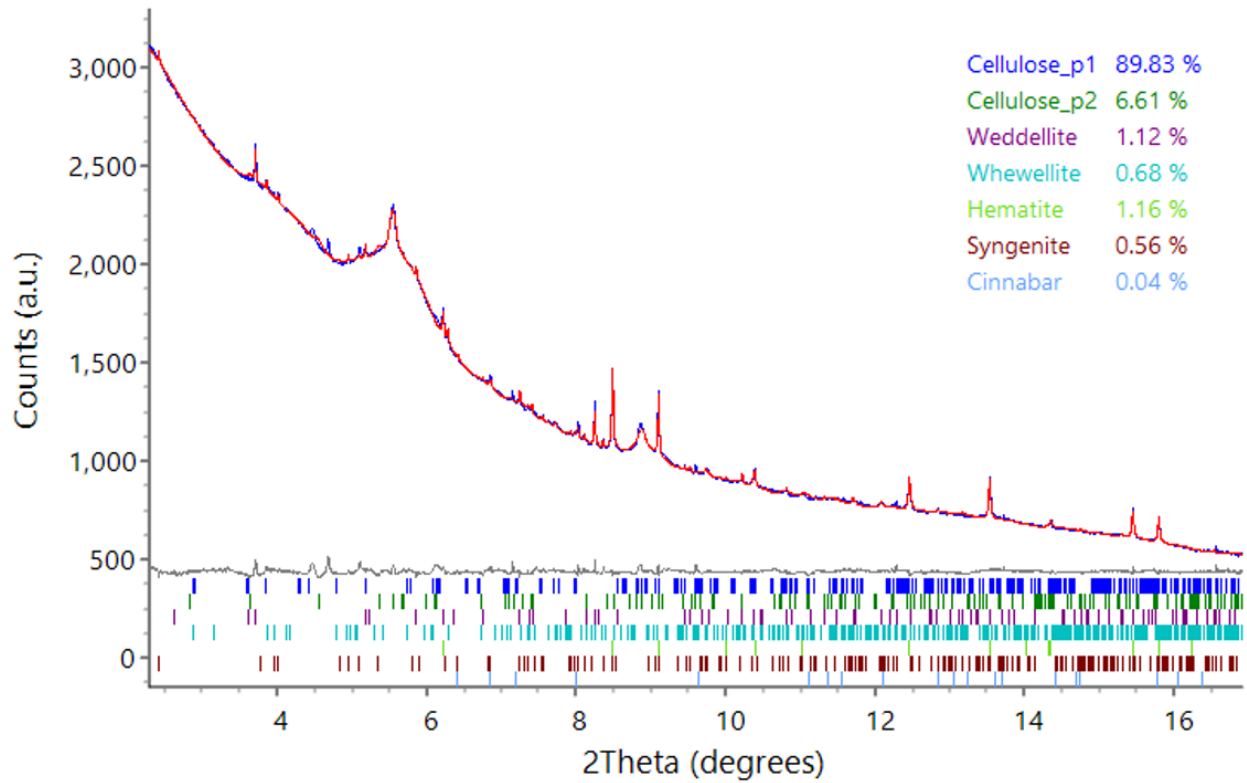

PAP-12 Cobra X-10750 ( $R_{wp}$  0.89%,  $R_{exp}$  0.59%)

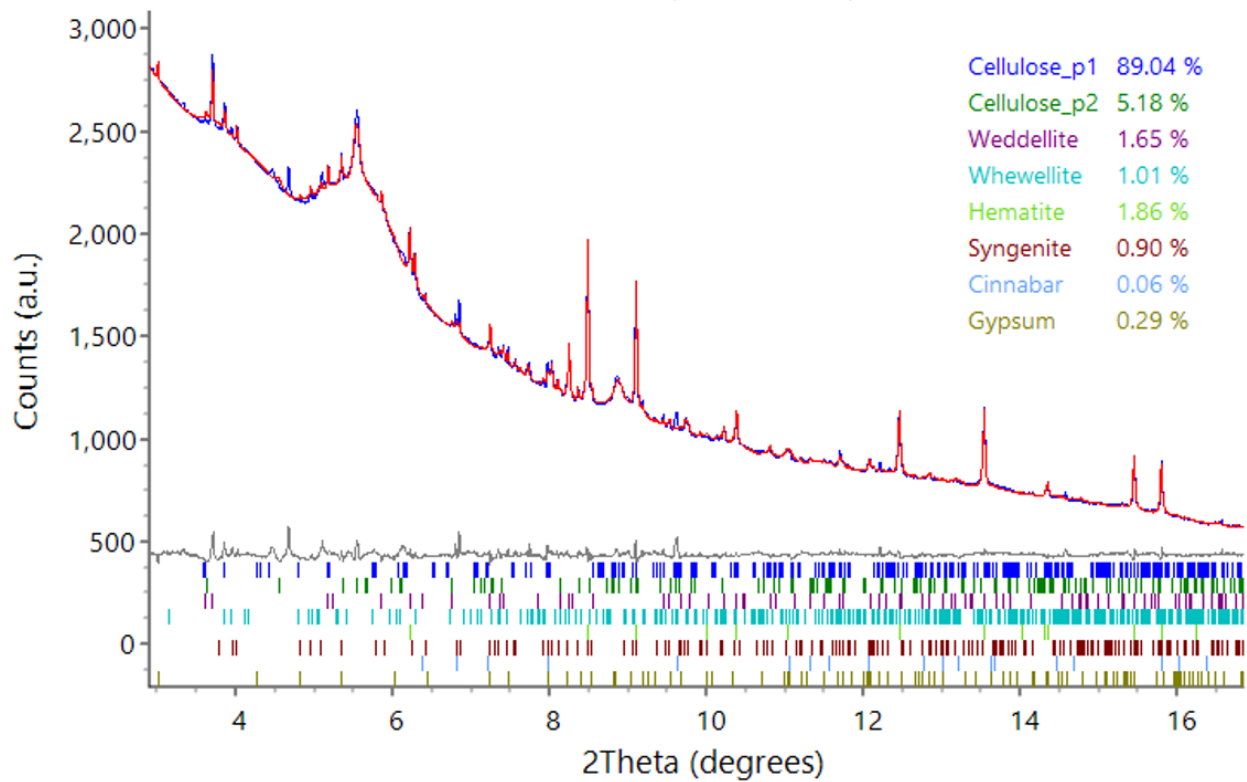

PAP-12 Cobra X-10500 ( $R_{wp}$  0.79%,  $R_{exp}$  0.53%)

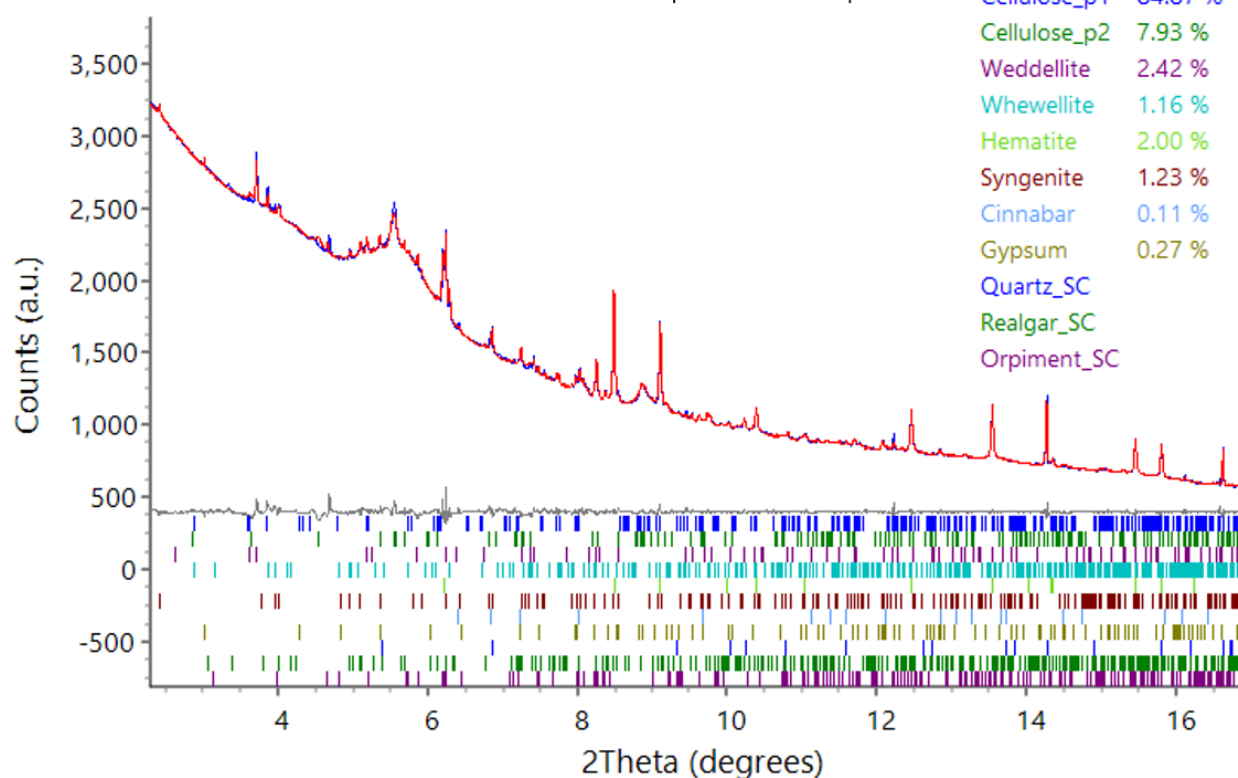

PAP-12 Cobra X-10250 ( $R_{wp}$  1.22%,  $R_{exp}$  0.56%)

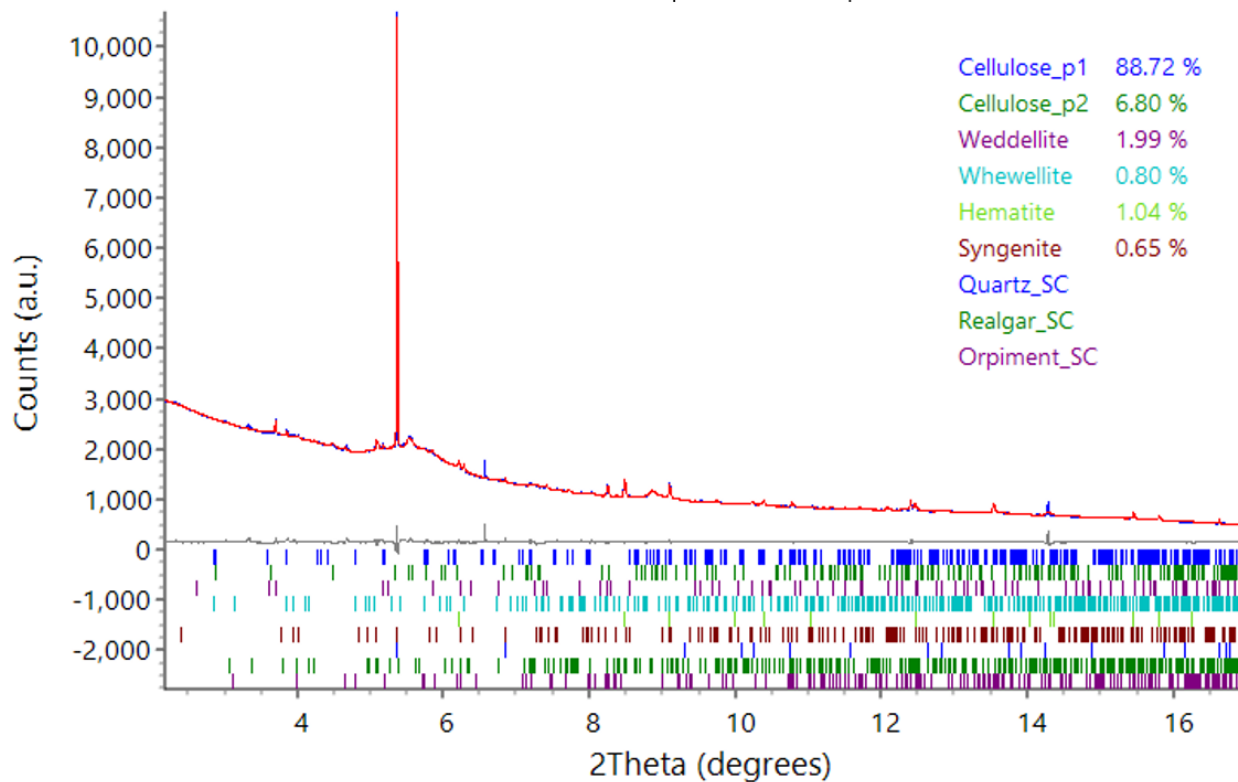

PAP-12 Cobra X-10000 ( $R_{wp}$  1.01%,  $R_{exp}$  0.55%)

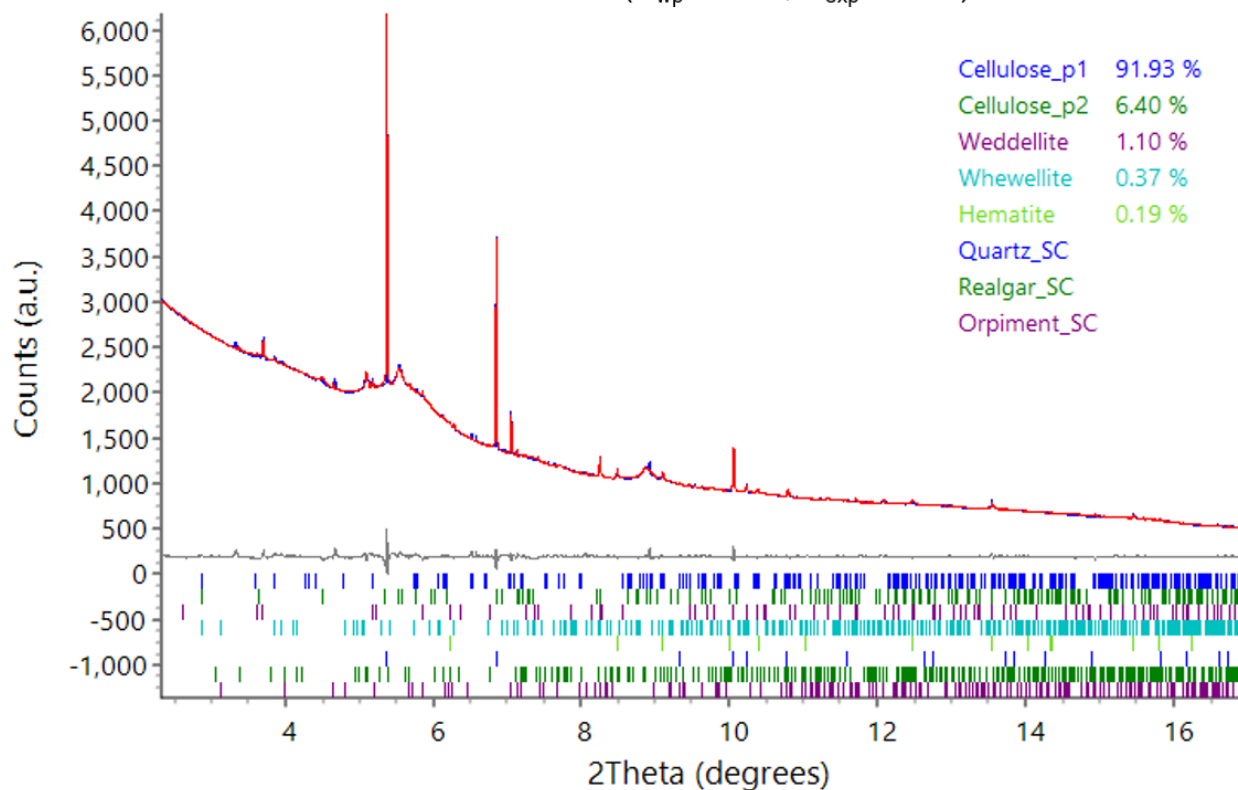

PAP-12 Cobra X-9750 ( $R_{wp}$  1.85%,  $R_{exp}$  0.51%)

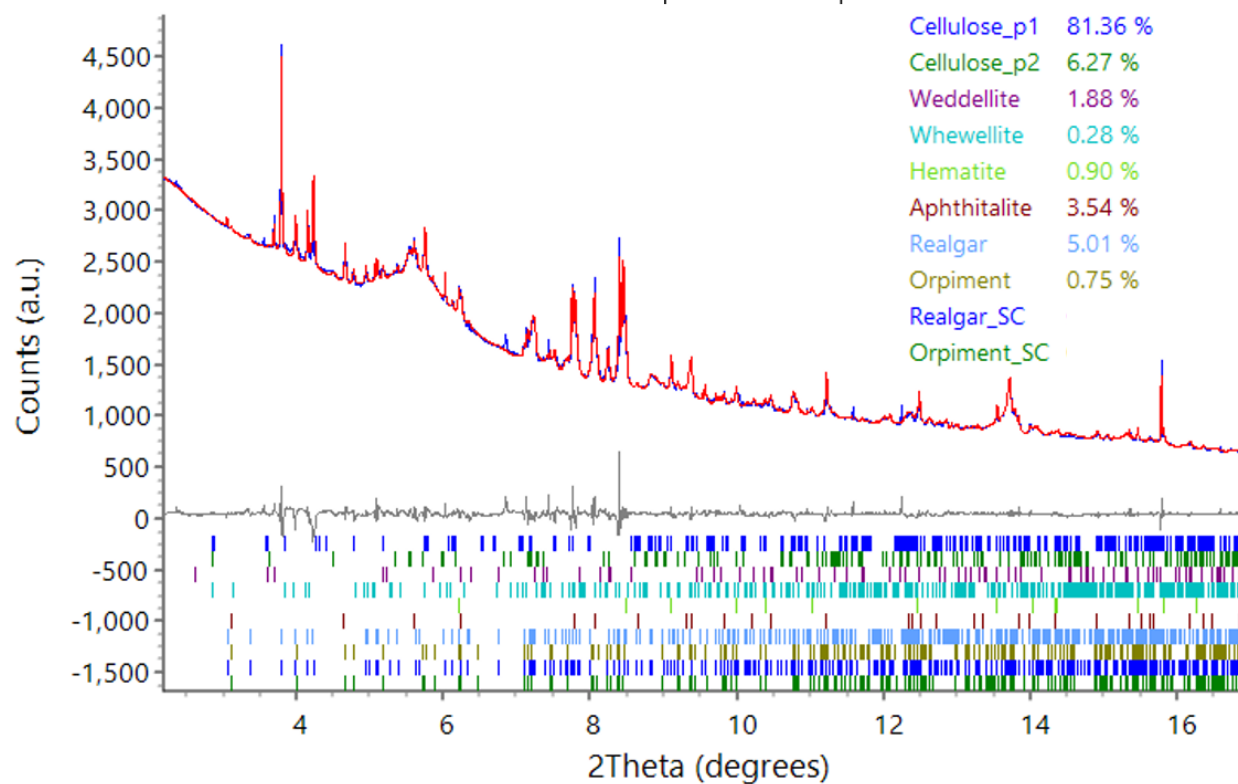



PAP-12 Cobra X-9500 ( $R_{wp}$  1.50%,  $R_{exp}$  0.47%)

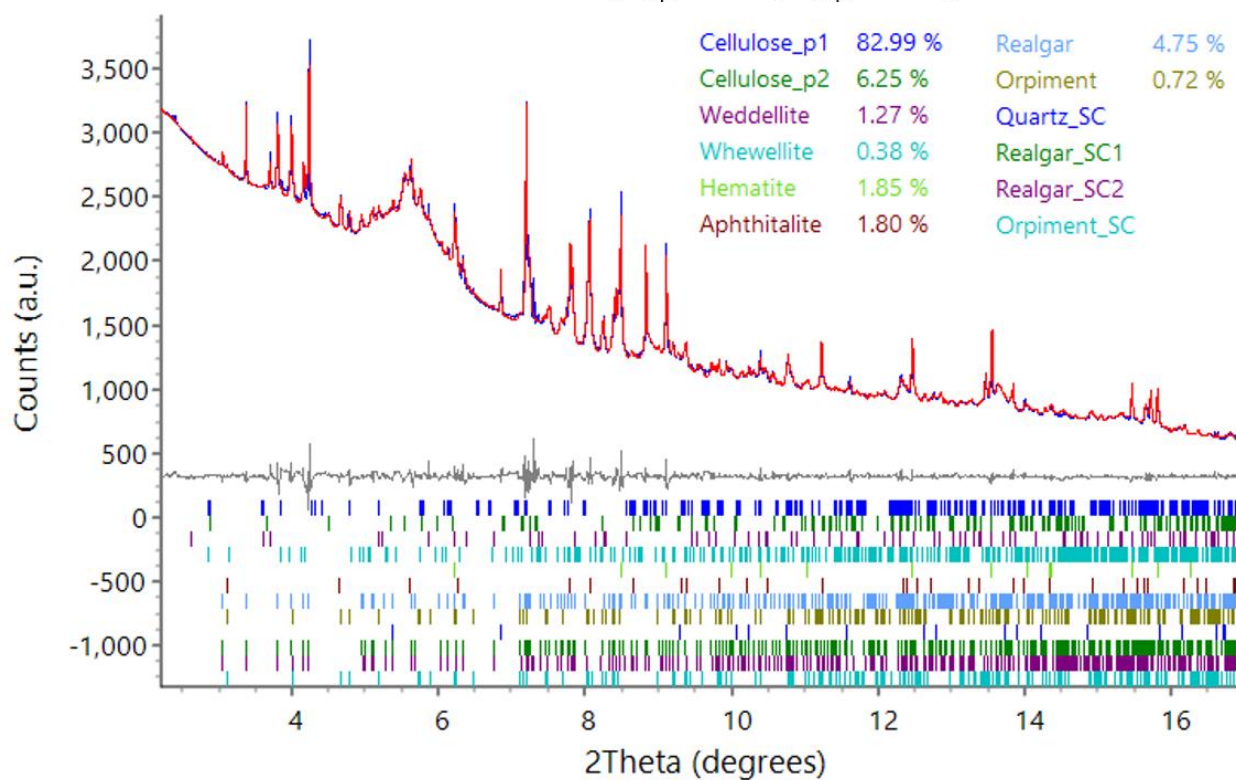

PAP-12 Cobra X-9250 ( $R_{wp}$  1.20%,  $R_{exp}$  0.52%)

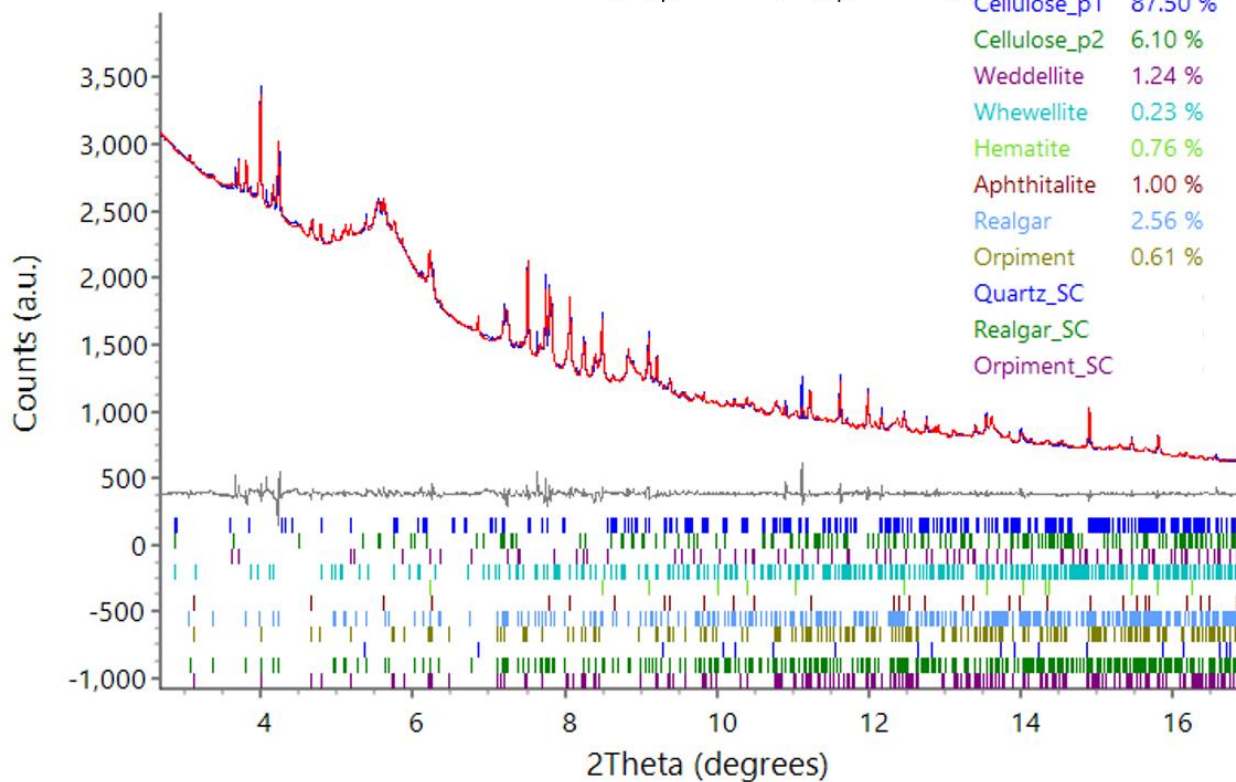

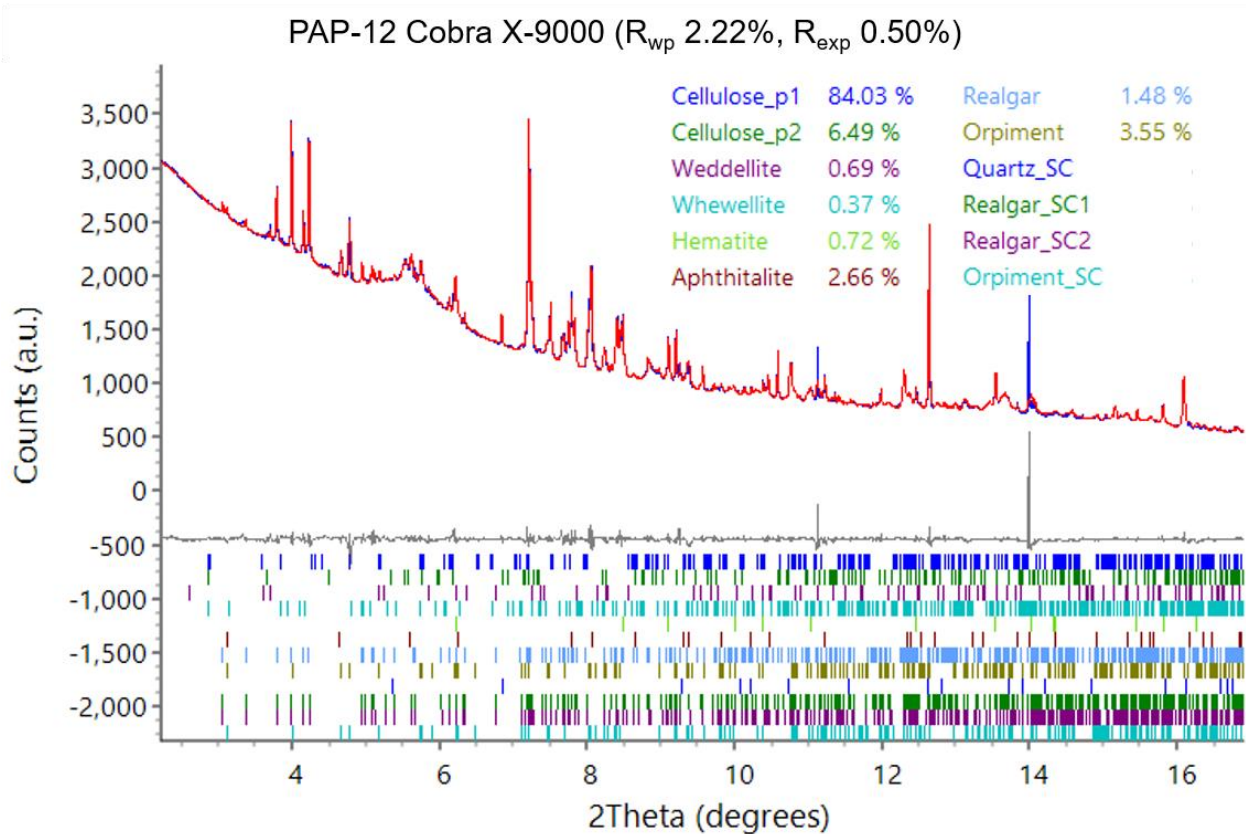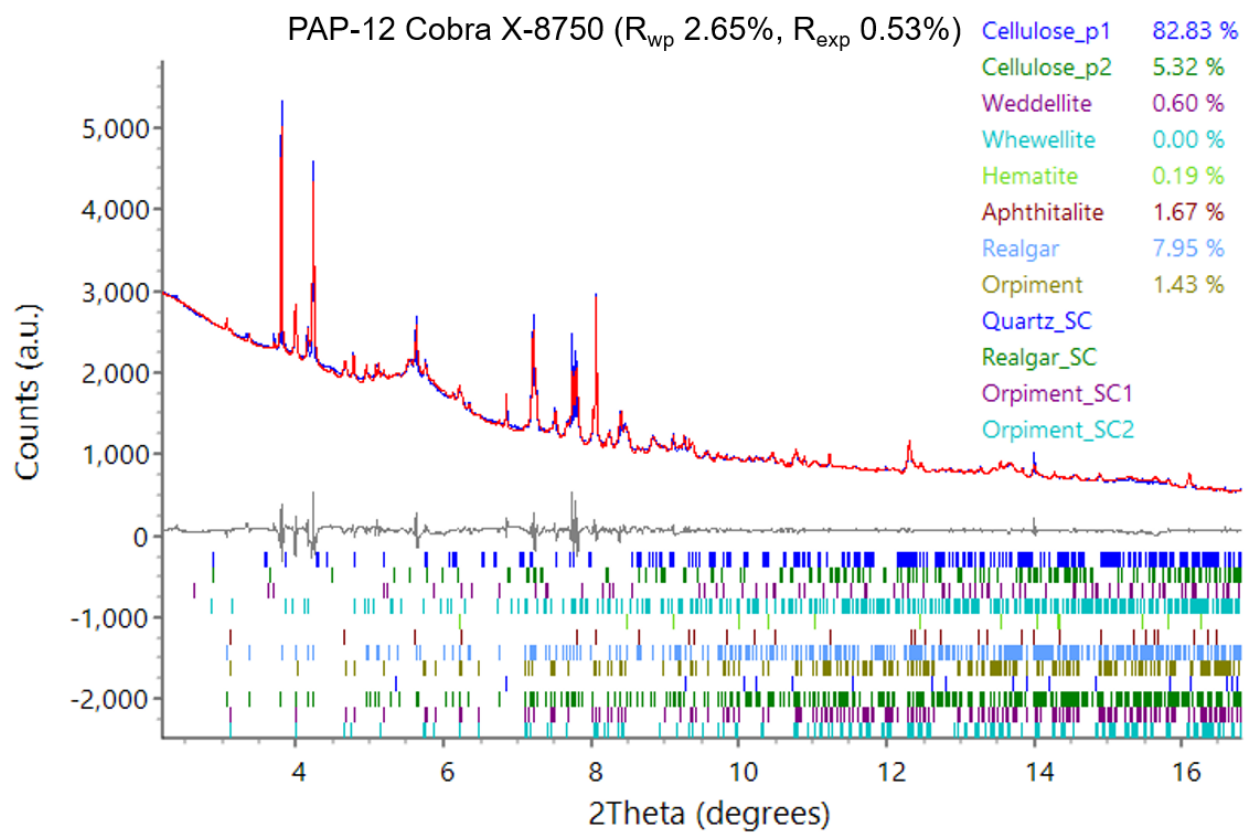

PAP-12 Cobra X-8500 ( $R_{wp}$  1.42%,  $R_{exp}$  0.55%)

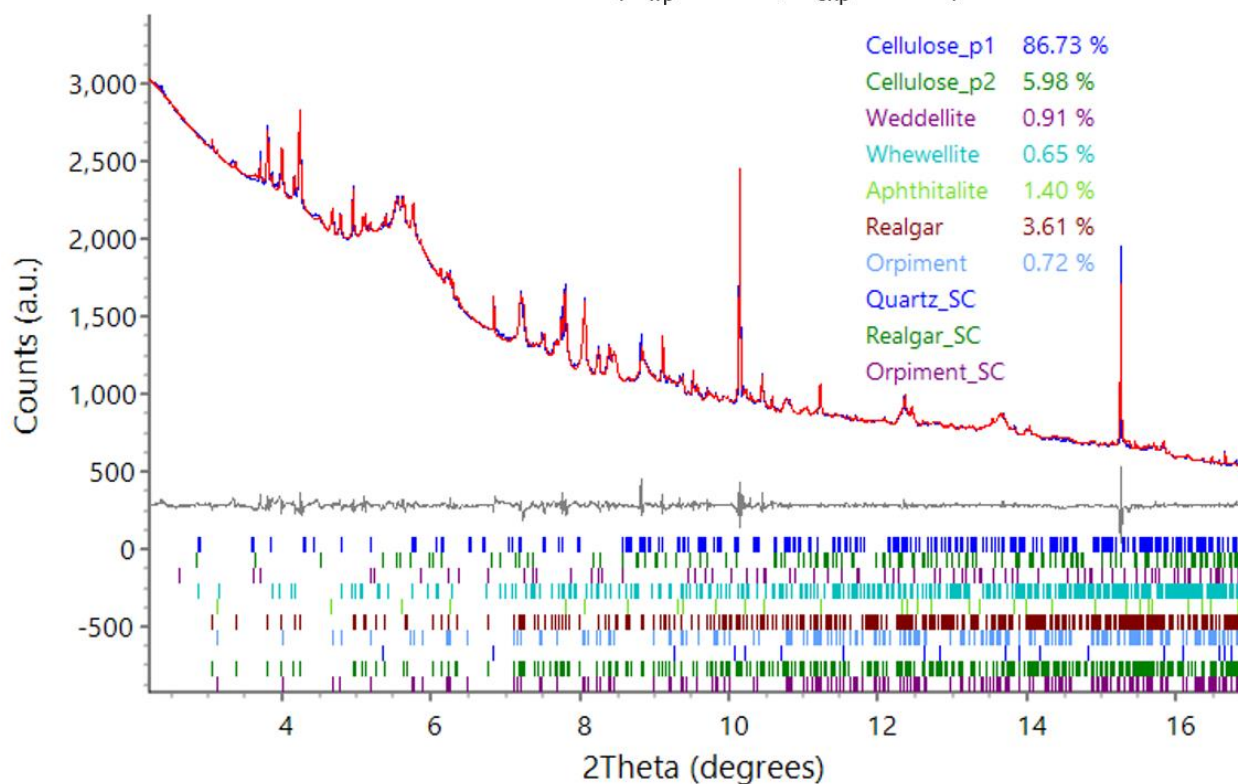

PAP-12 Cobra X-8250 ( $R_{wp}$  1.50%,  $R_{exp}$  0.50%)

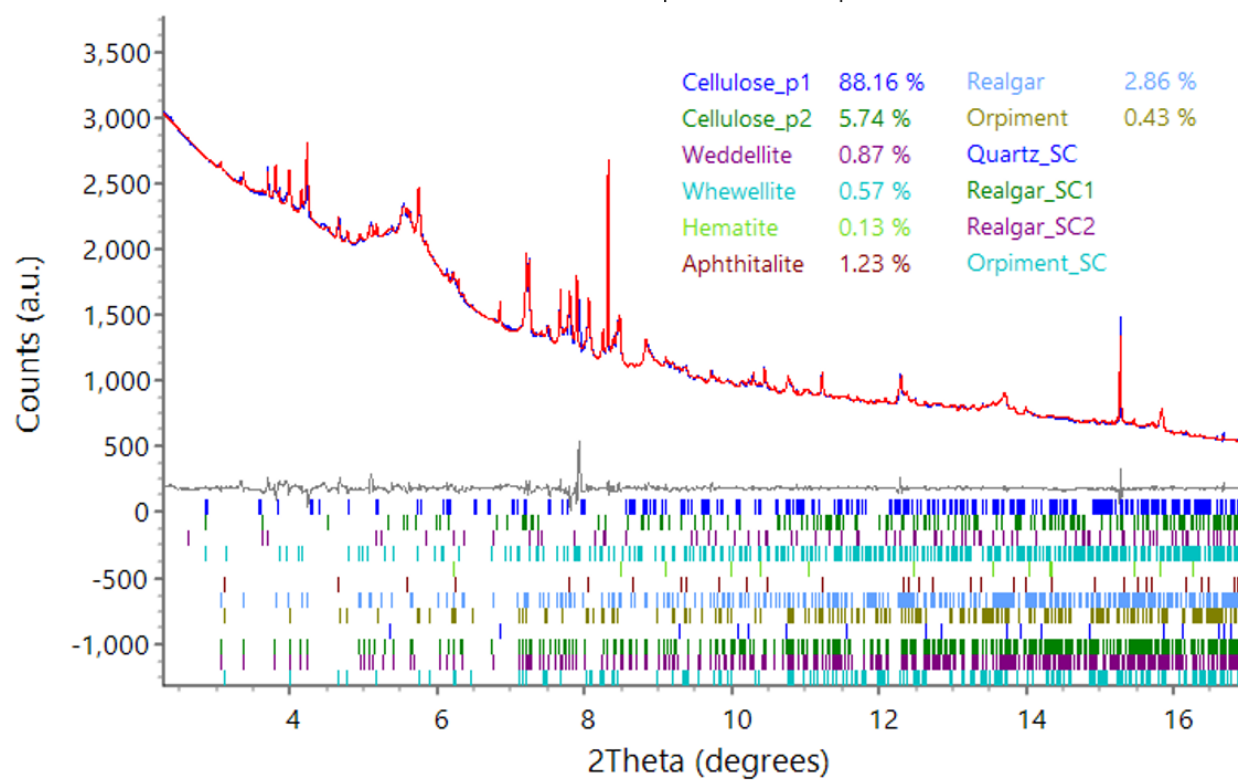

PAP-12 Cobra X-8000 ( $R_{wp}$  1.12%,  $R_{exp}$  0.48%)

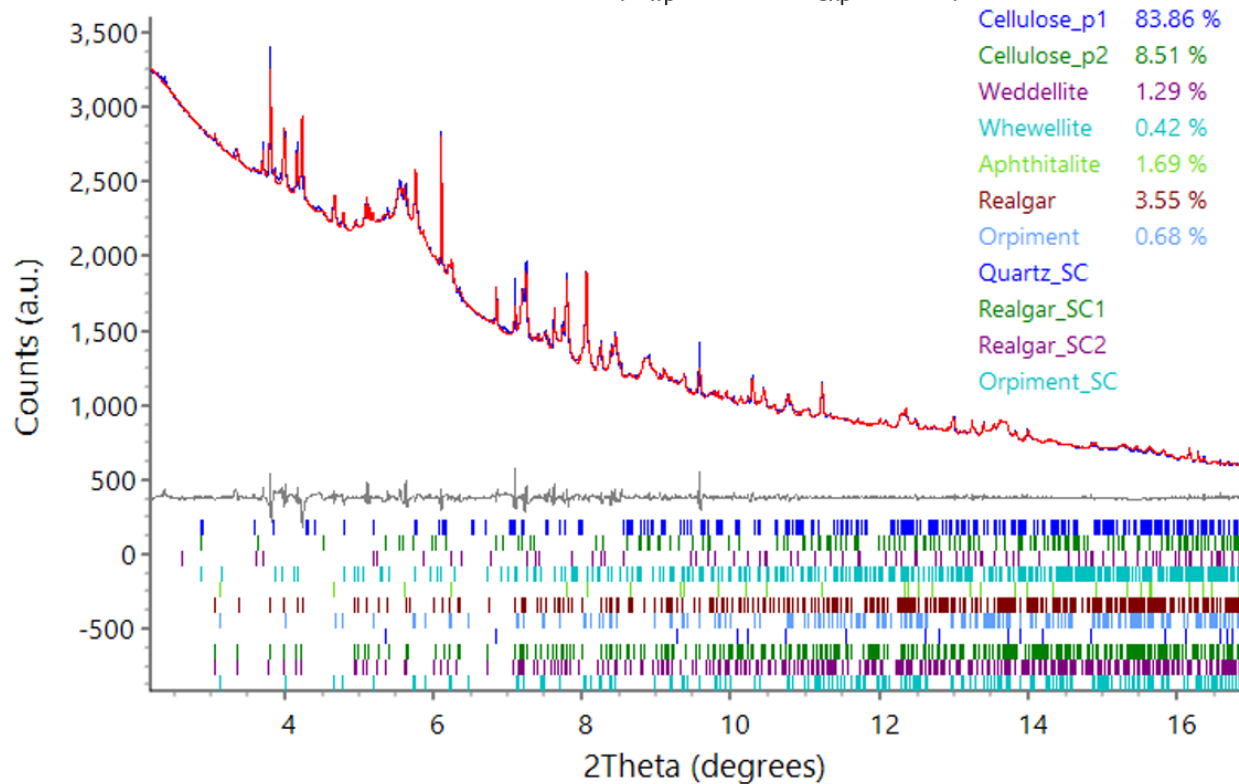

PAP-12 Cobra X-7750 ( $R_{wp}$  1.18%,  $R_{exp}$  0.55%)

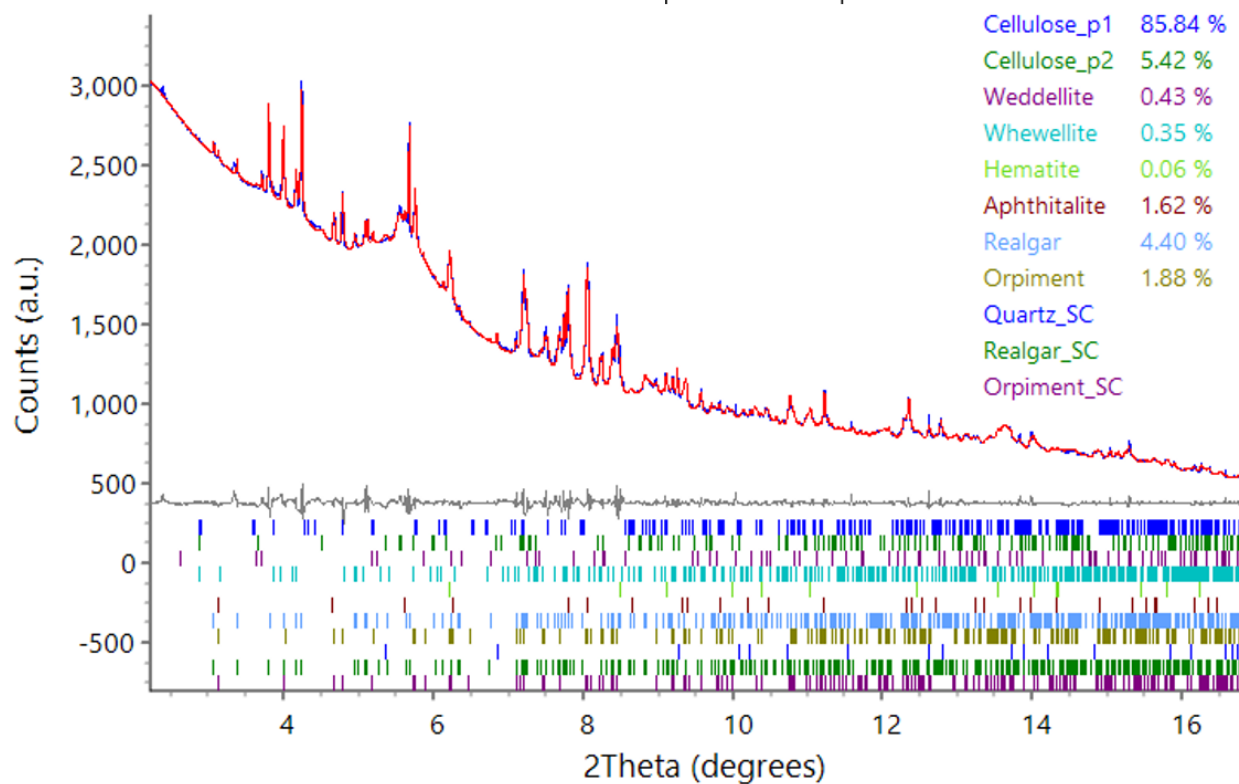

PAP-12 Cobra X-7500 ( $R_{wp}$  1.66%,  $R_{exp}$  0.55%)

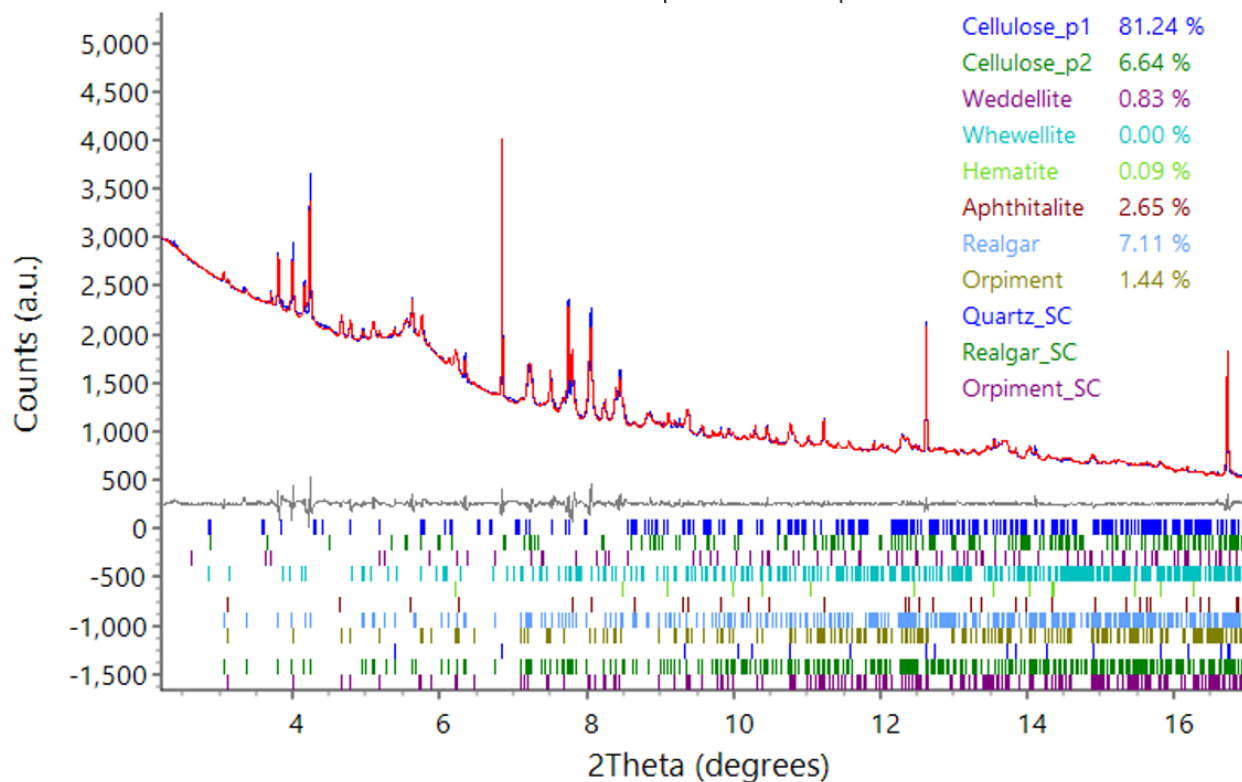

PAP-12 Cobra X-7250 ( $R_{wp}$  2.03%,  $R_{exp}$  0.57%)

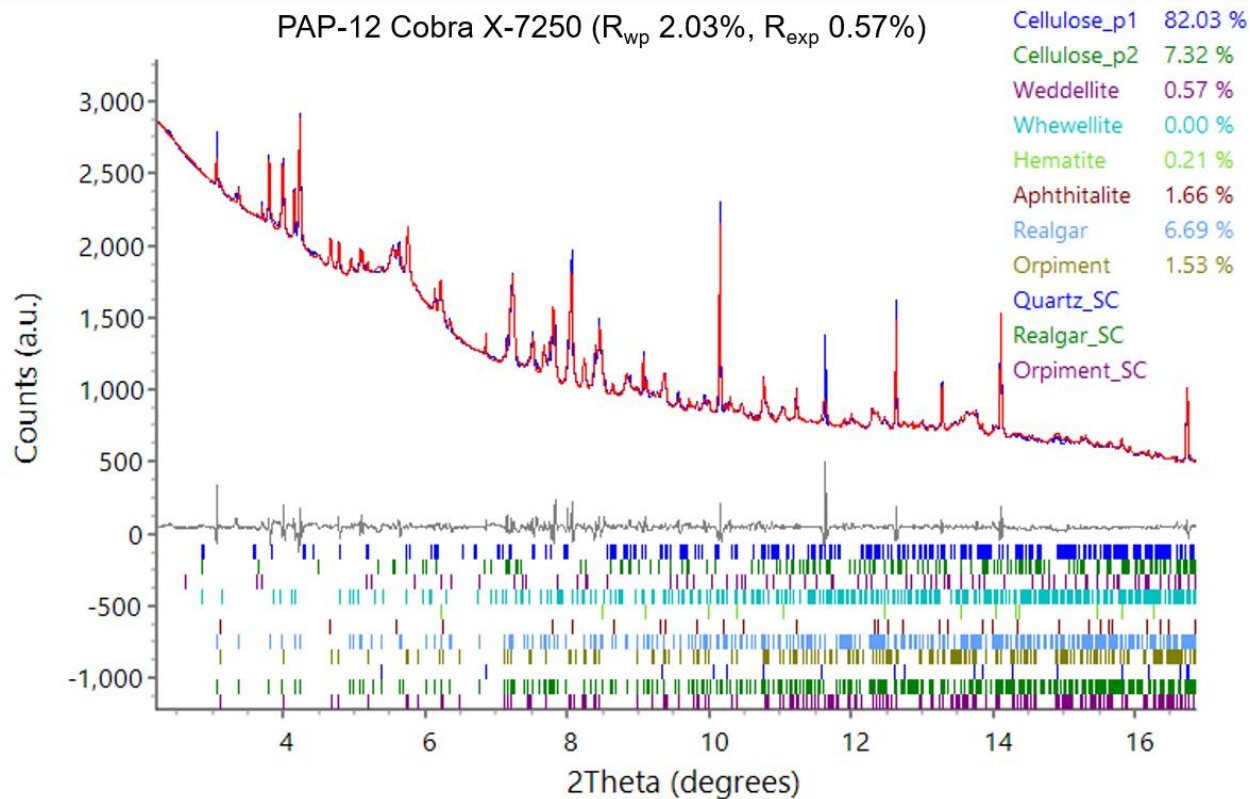

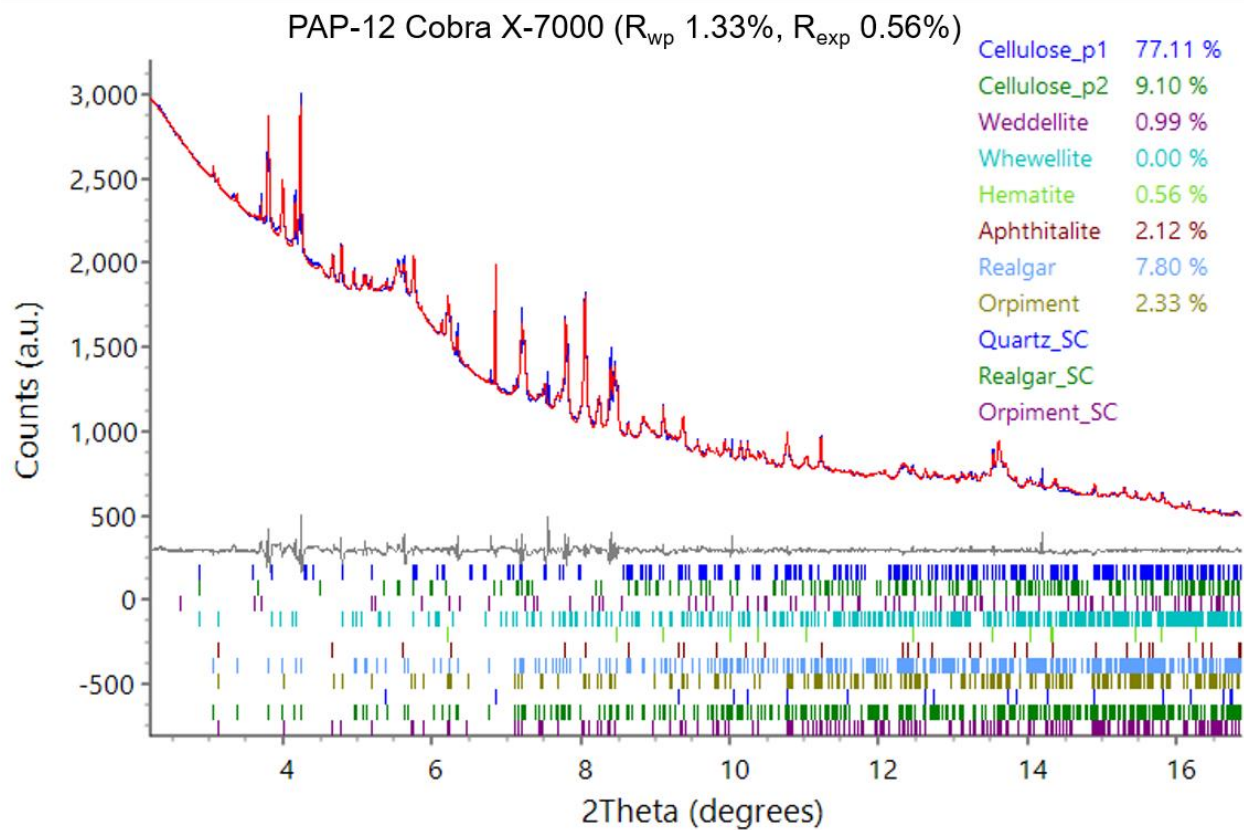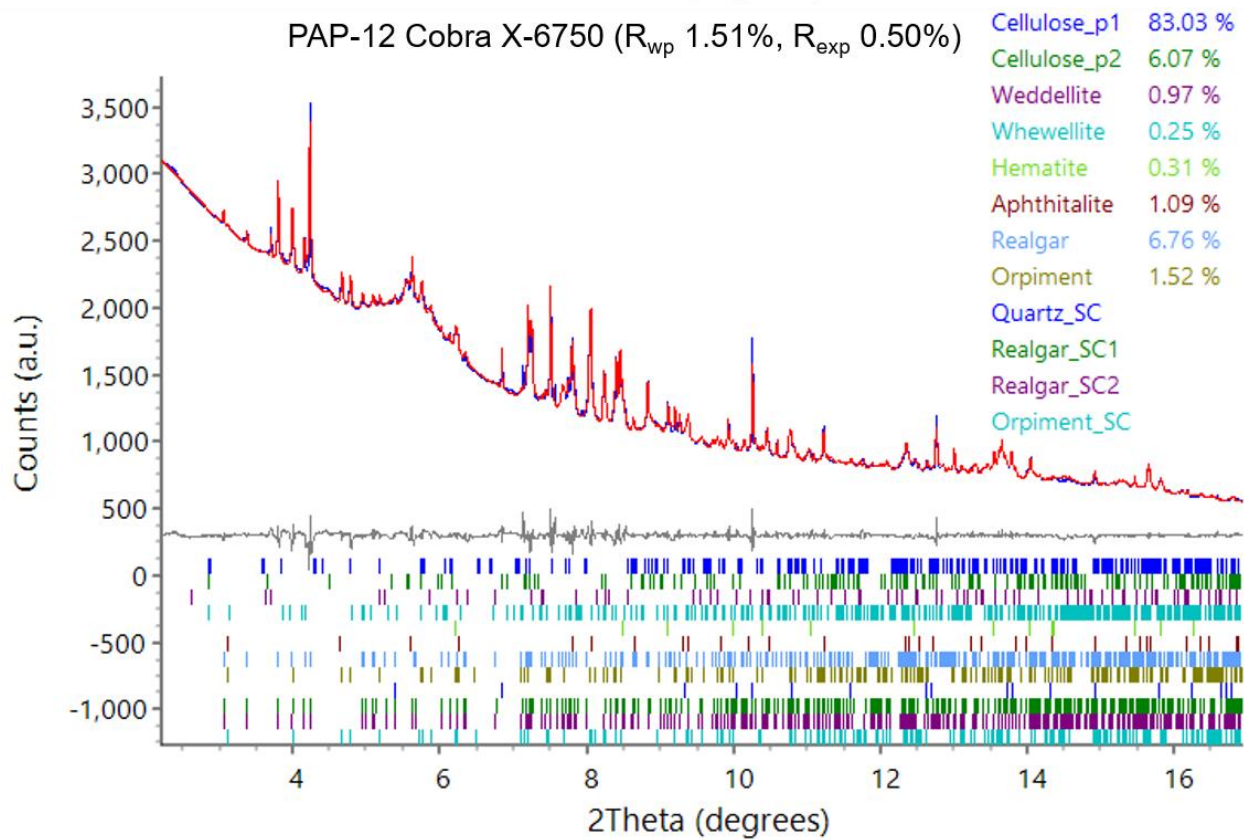

PAP-12 Cobra X-6500 ( $R_{wp}$  2.12%,  $R_{exp}$  0.58%)

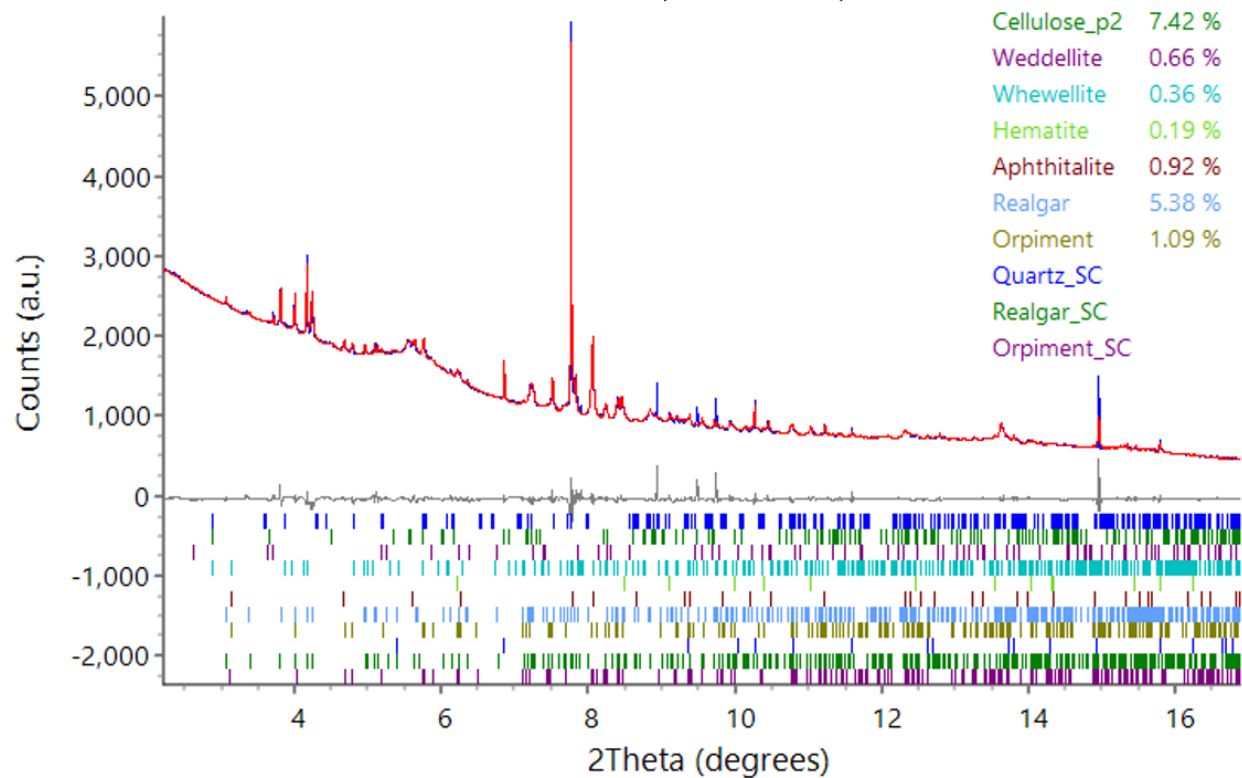

Supplement: 41598_2023_27761_MOESM1_ESM.pdf [file 41598_2023_27761_MOESM1_ESM.pdf]
